# Supplementary material for: A theoretical study of the reactivity of ethene and benzophenone with a hyper-coordinated alkene containing a so-called E=E (E = C, Si, Ge, Sn, and Pb) unit
Source: Royal Society of Chemistry journal article supplement (doi:10.1039/d0dt01914c), 2020-01-01
Supplement: d0dt01914c1.pdf [file d0dt01914c1.pdf]

# Supporting Information

## **A Theoretical Study of the Reactivity of Ethene and Benzophenone with a Hyper-Coordinated Alkene Containing a So-Called E=E (E = C, Si, Ge, Sn, and Pb) Unit**

Ming-Chung Yang<sup>1</sup> and Ming-Der Su<sup>1,2,a)</sup>

<sup>1</sup>Department of Applied Chemistry, National Chiayi University, Chiayi 60004, Taiwan

<sup>2</sup>Department of Medicinal and Applied Chemistry, Kaohsiung Medical University, Kaohsiung 80708, Taiwan

a) E-mail: [midesu@mail.ncyu.edu.tw](mailto:midesu@mail.ncyu.edu.tw)

## Contents:

**Figure S1.** The curve of intrinsic reaction coordinate (IRC) of transition state for  $C_2H_2 + \mathbf{Rea-E}$  ( $E = C, Si, Ge$ ) at B3PW91/def2-SVP level of theory.

**Figure S2.** The optimized **TS- $C_2H_2-E$**  ( $E = C, Si, \text{ and } Ge$ ) structures at the B3PW91/def2-SVP level of theory. The hydrogen is omitted for clarity.

**Figure S3.** The optimized **Prod- $C_2H_2-E$**  ( $E = C, Si, \text{ and } Ge$ ) structures at the B3PW91/def2-SVP level of theory. The hydrogen is omitted for clarity.

**Figure S4.** The curve of intrinsic reaction coordinate (IRC) of transition state for  $Ph_2CO + \mathbf{Rea-E}$  ( $E = C, Si, Ge$ ) at B3PW91/def2-SVP level of theory.

**Figure S5.** The optimized **TS- $Ph_2CO-E$**  ( $E = C, Si, \text{ and } Ge$ ) structures at the B3PW91/def2-SVP level of theory. The hydrogen is omitted for clarity.

**Figure S6.** The optimized **Prod- $Ph_2CO-E$**  ( $E = C, Si, \text{ and } Ge$ ) structures at the B3PW91/def2-SVP level of theory. The hydrogen is omitted for clarity.

**Table S1.** Relative energies for the reaction of **Rea-E** +  $C_2H_4$  and  $Ph_2CO$ .

**Table S2.** EDA energy decomposition results describing the transition state between  $C_2H_4$  and **Rea-Si**.

**Table S3.** EDA energy decomposition results describing the transition state between  $Ph_2CO$  and **Rea-Si**.

**Table S4-S31.** Geometrical coordinates of the reactants, transition states, and products for the reaction of **Rea-E** ( $E = C$  to  $Ge$ ) with  $C_2H_4$  and  $Ph_2CO$  at B3LYP-D3/def2-SVP level of theory.

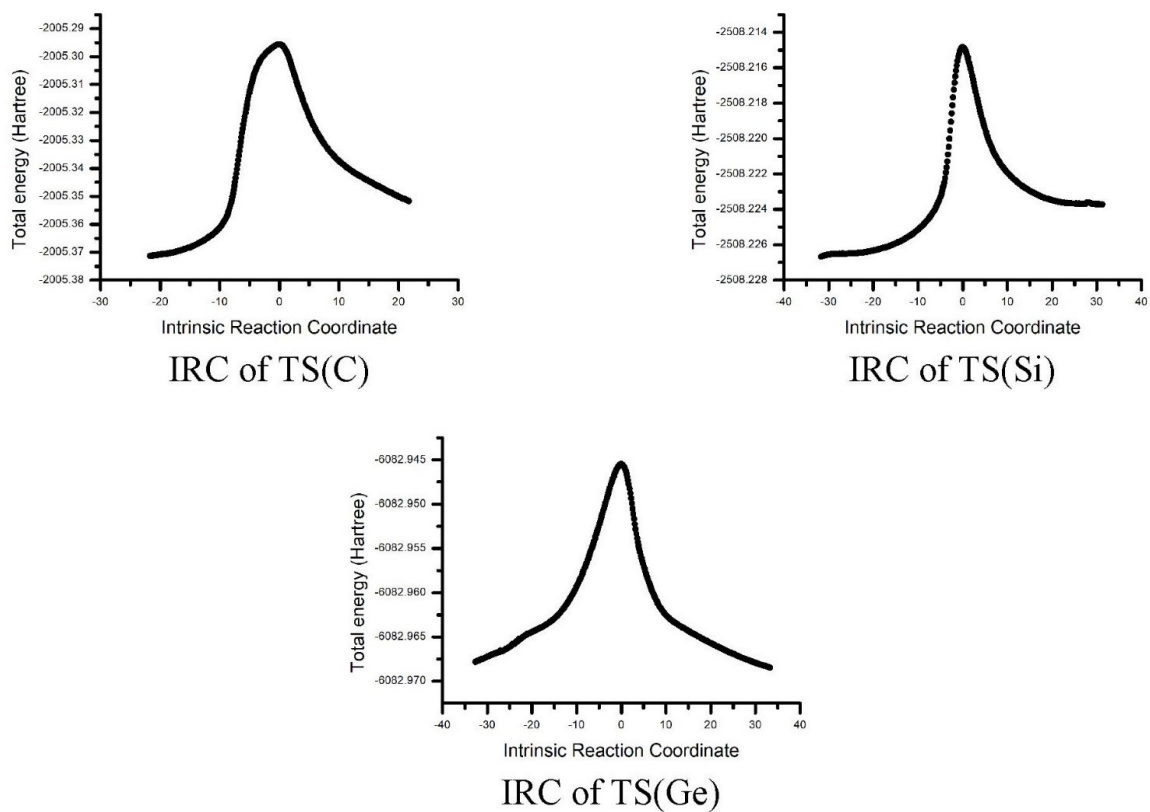

**Figure S1.** The curve of intrinsic reaction coordinate (IRC) of transition state for  $C_2H_2 + \mathbf{Rea-E}$  ( $E = C, Si, \text{ and } Ge$ ) at B3PW91/def2-SVP level of theory.

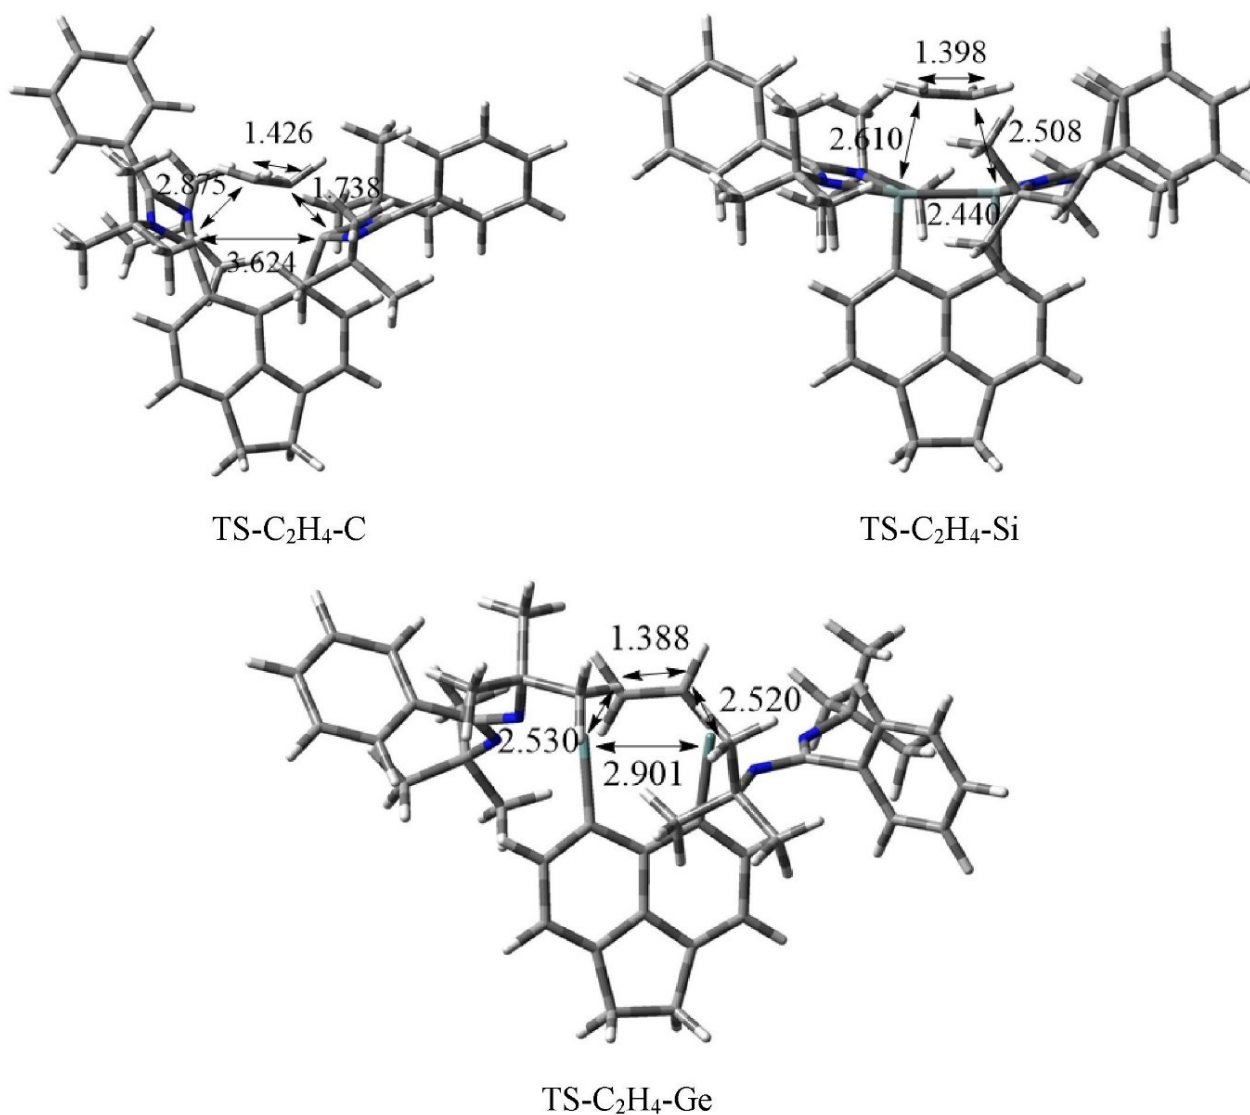

**Figure S2.** The optimized TS-C<sub>2</sub>H<sub>2</sub>-E (E = C, Si, and Ge) structures at the B3PW91/def2-SVP level of theory. The hydrogen is omitted for clarity.

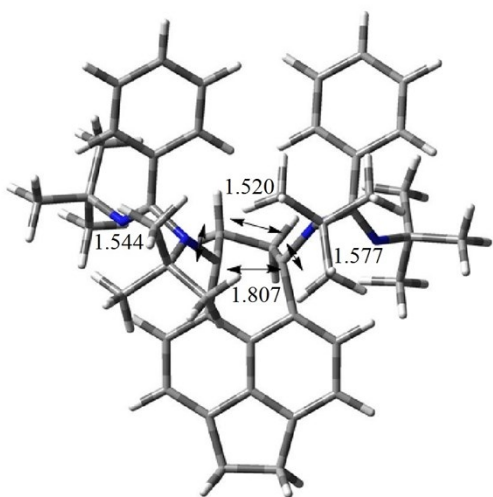

Prod-C<sub>2</sub>H<sub>4</sub>-C

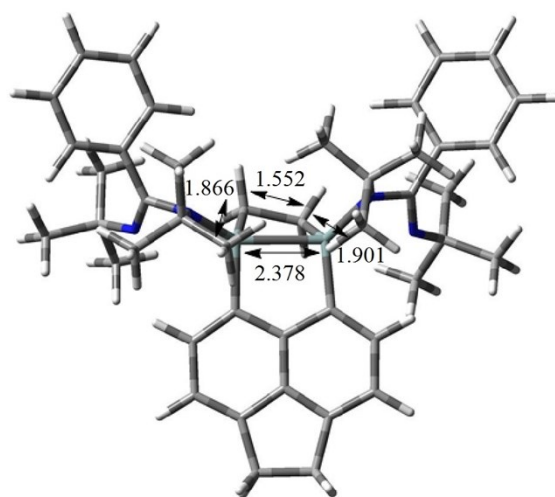

Prod-C<sub>2</sub>H<sub>4</sub>-Si

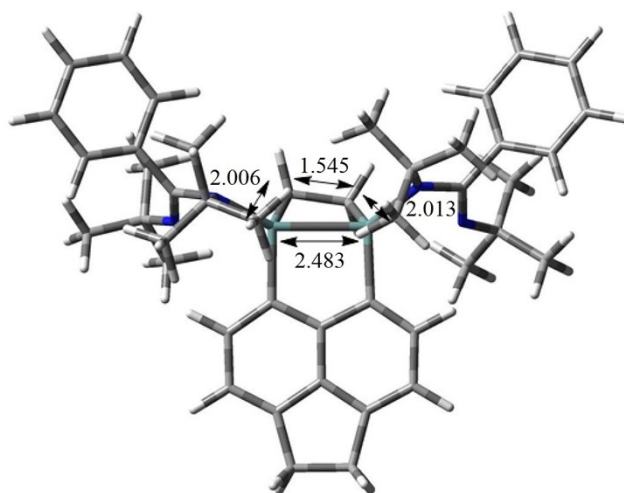

Prod-C<sub>2</sub>H<sub>4</sub>-Ge

**Figure S3.** The optimized **Prod-C<sub>2</sub>H<sub>2</sub>-E** (E = C, Si, and Ge) structures at the B3PW91/def2-SVP level of theory. The hydrogen is omitted for clarity.

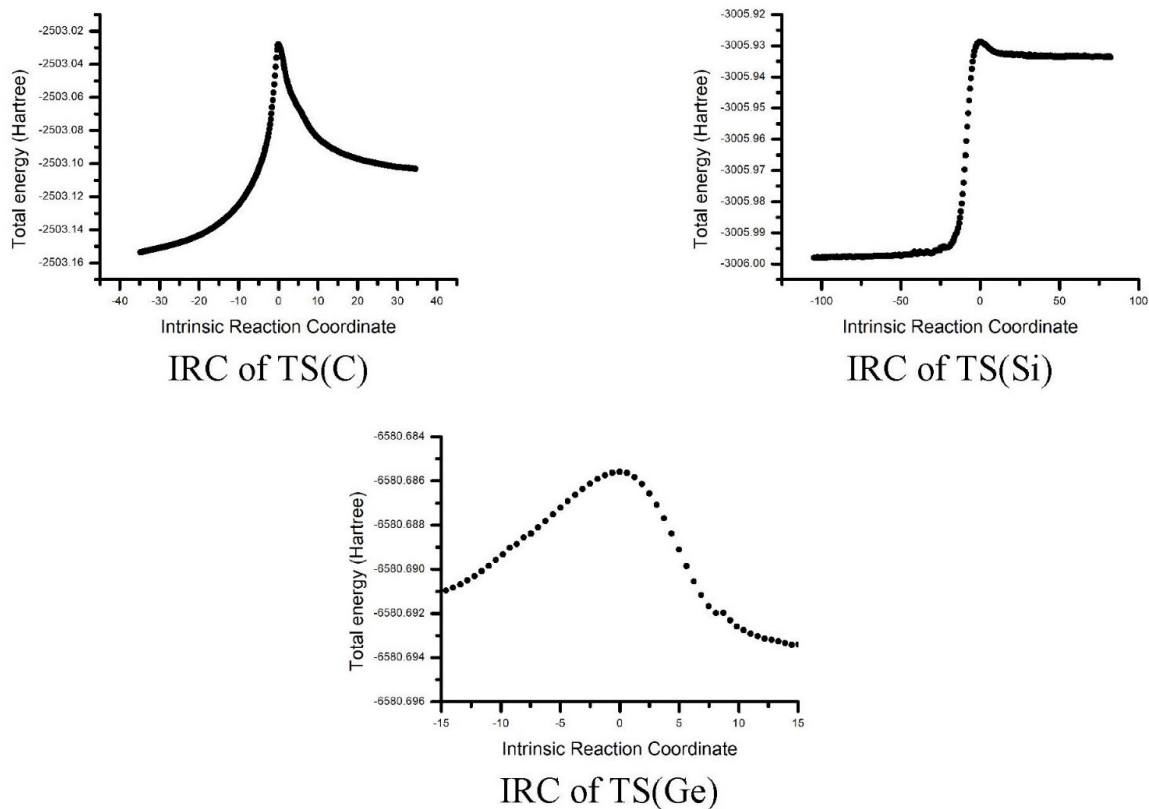

**Figure S4.** The curve of intrinsic reaction coordinate (IRC) of transition state for Ph<sub>2</sub>CO + **Rea-E** (E = C, Si, Ge) at B3PW91/def2-SVP level of theory.

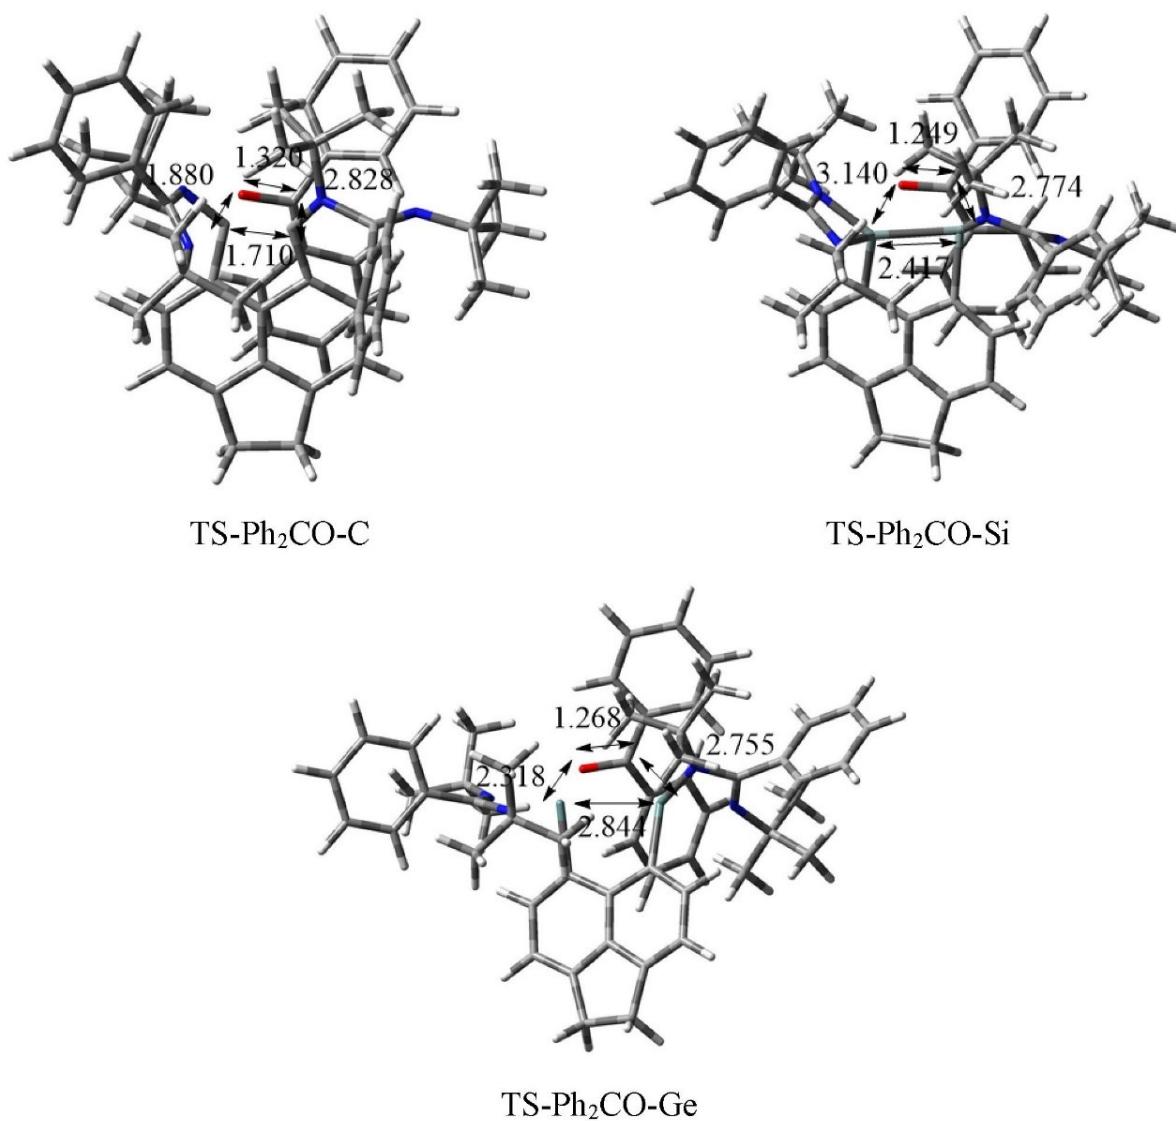

**Figure S5.** The optimized **TS-Ph<sub>2</sub>CO-E** (E = C, Si, and Ge) structures at the B3PW91/def2-SVP level of theory. The hydrogen is omitted for clarity.

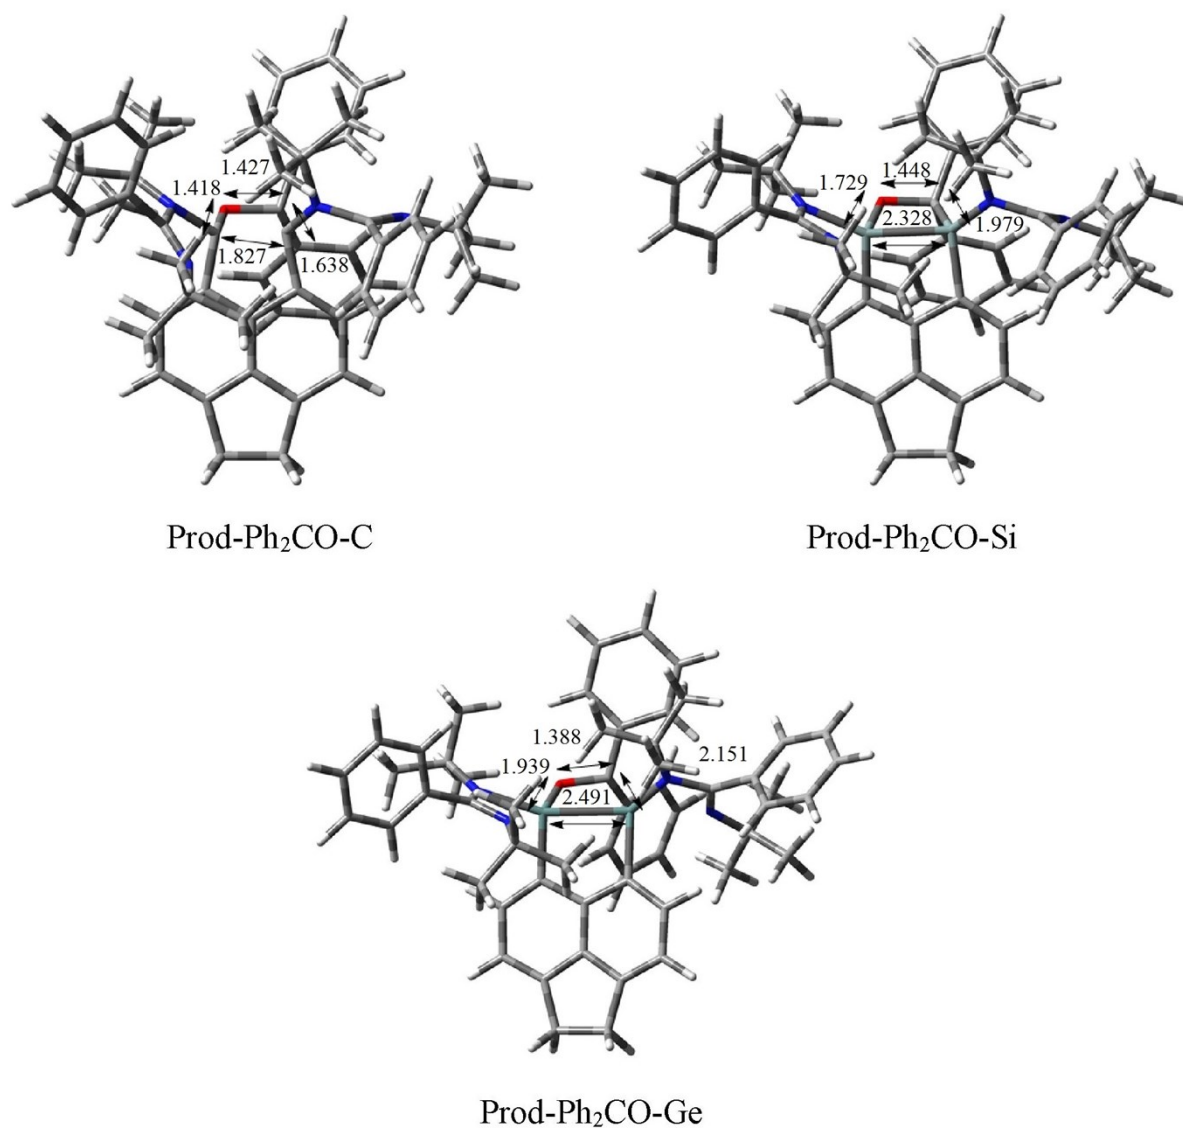

**Figure S6.** The optimized **Prod-Ph<sub>2</sub>CO-E** (E = C, Si, and Ge) structures at the B3PW91/def2-SVP level of theory. The hydrogen is omitted for clarity.



**Table S1.** Relative energies for the reaction of **Rea-E** + C<sub>2</sub>H<sub>4</sub> and Ph<sub>2</sub>CO

Table. Relative Energies (in kcal/mol) for Singlet and Triplet Group 14 Analogues (E = C, Si, Ge) for the Addition Reactions with C<sub>2</sub>H<sub>4</sub>: Reactant (Rea-E) → Transition State → Prod-E<sup>a, b</sup>

| system | $\Delta E_{\text{st}}^{\text{c}}$ | $\Delta G_{\text{TS}}^{\text{d}}$ | $\Delta G_{\text{Prod}}^{\text{e}}$ |
|--------|-----------------------------------|-----------------------------------|-------------------------------------|
| E = C  | 29.7 [33.8]                       | 54.8 [55.3]                       | -29.9 [-38.5]                       |
| E = Si | 19.5 [30.7]                       | 15.5 [16.6]                       | -13.3 [-16.3]                       |
| E = Ge | 46.9 [42.6]                       | 29.6 [30.0]                       | 15.5 [3.8]                          |

<sup>a</sup> All at the B3LYP-D3/def2-SVP level of theory. The values in bracket are obtained at M06-2X/def2-SVP level of theory.

<sup>b</sup> Energy differences have used the Gibbs free energy ( $\Delta G$ ).

<sup>c</sup> Energy relative to the corresponding singlet state. A positive value means the singlet is the ground state.

<sup>d</sup> The energy of the transition state is relative to the corresponding reactant.

<sup>e</sup> The energy of product is relative to the corresponding reactant.

Table. Relative Energies (in kcal/mol) for Singlet and Triplet Group 14 Analogues (E = C, Si, Ge) for the Addition Reactions with Ph<sub>2</sub>CO: Reactant (Rea-E) → Transition State → Prod-E<sup>a, b</sup>

| system | $\Delta E_{\text{st}}^{\text{c}}$ | $\Delta G_{\text{TS}}^{\text{d}}$ | $\Delta G_{\text{Prod}}^{\text{e}}$ |
|--------|-----------------------------------|-----------------------------------|-------------------------------------|
| E = C  | 29.7 [33.8]                       | 44.2 [52.2]                       | 0.1 [-6.0]                          |
| E = Si | 19.5 [30.7]                       | 13.2 [21.6]                       | -27.2 [-28.8]                       |
| E = Ge | 46.9 [42.6]                       | 10.7 [15.9]                       | 7.7 [2.2]                           |

<sup>a</sup> All at the B3LYP-D3/def2-SVP level of theory. The values in bracket are obtained at M06-2X/def2-SVP level of theory.

<sup>b</sup> Energy differences have used the Gibbs free energy ( $\Delta G$ ).

<sup>c</sup> Energy relative to the corresponding singlet state. A positive value means the singlet is the ground state.

<sup>d</sup> The energy of the transition state is relative to the corresponding reactant.

<sup>e</sup> The energy of product is relative to the corresponding reactant.

**Table S2.** EDA energy decomposition results describing the transition state between C<sub>2</sub>H<sub>4</sub> and Rea-Si.

| ETS results                         | Rea   | TS     | Prod   | $\Delta E^\#[\Delta E(\text{TS})-\Delta E(\text{Rea})]$ | $\Delta E_{\text{rxn}}[\Delta E(\text{Prod})-\Delta E(\text{Rea})]$ |
|-------------------------------------|-------|--------|--------|---------------------------------------------------------|---------------------------------------------------------------------|
| Fragments in the singlet spin state |       |        |        |                                                         |                                                                     |
| $\Delta E_{\text{total}}^{(b)}$     | 0.0   | 15.0   | -34.0  | 15.0                                                    | -34.0                                                               |
| $\Delta E_{\text{orb}}$             | 0.0   | -101.2 | -474.0 | -101.2                                                  | -474.0                                                              |
| $\Delta E_{\text{Pauli}}$           | 0.0   | 232.5  | 606.2  | 232.5                                                   | 606.2                                                               |
| $\Delta E_{\text{elstat}}$          | 0.0   | -114.8 | -261.8 | -114.8                                                  | -261.8                                                              |
| $\Delta E_{\text{disper}}$          | 0.0   | -17.9  | -12.9  | -17.9                                                   | -12.9                                                               |
| $\Delta E_{\text{dist}}$            | 0.0   | 16.4   | 108.5  | 16.4                                                    | 108.5                                                               |
| Fragments in the triplet spin state |       |        |        |                                                         |                                                                     |
| $\Delta E_{\text{total}}^{(c)}$     | 0.0   | 15.0   | -34.0  | 15.0                                                    | -34.0                                                               |
| $\Delta E_{\text{orb}}$             | -77.9 | -152.7 | -294.0 | -74.8                                                   | -216.1                                                              |
| $\Delta E_{\text{Pauli}}$           | 0.0   | 88.0   | 387.7  | 88.0                                                    | 387.7                                                               |
| $\Delta E_{\text{elstat}}$          | 0.0   | -59.6  | -257.8 | -59.6                                                   | -257.8                                                              |
| $\Delta E_{\text{disper}}$          | 0.0   | -16.5  | -12.9  | -16.5                                                   | -12.9                                                               |
| $\Delta E_{\text{dist}}$            | 77.9  | 155.8  | 143.0  | 77.9                                                    | 65.1                                                                |

<sup>(a)</sup>  $\Delta E_{\text{total}} = \Delta E_{\text{orb}} + \Delta E_{\text{Pauli}} + \Delta E_{\text{elstat}} + \Delta E_{\text{disper}} + \Delta E_{\text{dist}}$

<sup>(b)</sup> Fragments in singlet state were considered in ETS analysis.

<sup>(c)</sup> Fragments in triplet state were considered in ETS analysis. Distortion energy,  $\Delta E_{\text{dist}}$ , calculated with respect to the singlet ground state of C<sub>2</sub>H<sub>4</sub> and Rea-Si.

- It was said that the smallest  $\Delta E_{\text{orb}}$  value indicates which fragments are the best choice for describing the bonding situation, because the least alteration of the electronic charge distribution is required to yield the electronic structure of the molecule. See reference (76).
- Accordingly, a singlet reference state is more appropriate for a description of the TS and the triplet reference state can be a description of the product.

**Table S3.** EDA energy decomposition results describing the transition state between Ph<sub>2</sub>CO and Rea-Si.

Table. BP86-D3 ETS<sup>(a)</sup> energy decomposition results (in kcal mol<sup>-1</sup>) describing the bond between Ph<sub>2</sub>CO and Rea-Si for Rea → Transition State → Prod. Singlet and triplet spin states were considered in ETS-NOCV analysis.

| ETS results                         | Rea   | TS     | Prod   | $\Delta E^\#[\Delta E(\text{TS}) - \Delta E(\text{Rea})]$ | $\Delta E_{\text{rxn}}[\Delta E(\text{Prod}) - \Delta E(\text{Rea})]$ |
|-------------------------------------|-------|--------|--------|-----------------------------------------------------------|-----------------------------------------------------------------------|
| Fragments in the singlet spin state |       |        |        |                                                           |                                                                       |
| $\Delta E_{\text{total}}^{(b)}$     | 0.0   | 14.8   | -26.8  | 14.8                                                      | -26.8                                                                 |
| $\Delta E_{\text{orb}}$             | 0.0   | -41.5  | -406.4 | -41.5                                                     | -406.4                                                                |
| $\Delta E_{\text{Pauli}}$           | 0.0   | 123.4  | 614.4  | 123.4                                                     | 614.4                                                                 |
| $\Delta E_{\text{elstat}}$          | 0.0   | -55.7  | -294.3 | -55.7                                                     | -294.3                                                                |
| $\Delta E_{\text{disper}}$          | 0.0   | -30.0  | -32.9  | -30.0                                                     | -32.9                                                                 |
| $\Delta E_{\text{dist}}$            | 0.0   | 18.6   | 92.4   | 18.6                                                      | 92.4                                                                  |
| Fragments in the triplet spin state |       |        |        |                                                           |                                                                       |
| $\Delta E_{\text{total}}^{(c)}$     | 0.0   | 14.8   | -26.8  | 14.8                                                      | -26.8                                                                 |
| $\Delta E_{\text{orb}}$             | -75.0 | -133.9 | -429.5 | -58.9                                                     | -354.5                                                                |
| $\Delta E_{\text{Pauli}}$           | 0.0   | 70.1   | 600.4  | 70.1                                                      | 600.4                                                                 |
| $\Delta E_{\text{elstat}}$          | 0.0   | -45.7  | -292.9 | -45.7                                                     | -292.9                                                                |
| $\Delta E_{\text{disper}}$          | 0.0   | -30.0  | -32.9  | -30.0                                                     | -32.9                                                                 |
| $\Delta E_{\text{dist}}$            | 75.0  | 154.3  | 128.1  | 79.3                                                      | 53.1                                                                  |

<sup>(a)</sup>  $\Delta E_{\text{total}} = \Delta E_{\text{orb}} + \Delta E_{\text{Pauli}} + \Delta E_{\text{elstat}} + \Delta E_{\text{disper}} + \Delta E_{\text{dist}}$

<sup>(b)</sup> Fragments in singlet state were considered in ETS analysis.

<sup>(c)</sup> Fragments in triplet state were considered in ETS analysis. Distortion energy,  $\Delta E_{\text{dist}}$ , calculated with respect to the singlet ground state of Ph<sub>2</sub>CO and Rea-Si.

- It was said that the smallest  $\Delta E_{\text{orb}}$  value indicates which fragments are the best choice for describing the bonding situation, because the least alteration of the electronic charge distribution is required to yield the electronic structure of the molecule. See reference (76).
- Accordingly, a singlet reference state is more appropriate for a description of the TS and the singlet reference state can be a description of the product.

**Table S4**  
**B3LYP-D3/def2-SVP**  
**C<sub>2</sub>H<sub>4</sub>**  
**G = -78.503293 Hartree**

---

| Atomic<br>Number | Coordinates (Angstroms) |           |           |
|------------------|-------------------------|-----------|-----------|
|                  | X                       | Y         | Z         |
| 6                | 0.000000                | -0.666610 | -0.000000 |
| 1                | -0.931140               | -1.242636 | -0.000000 |
| 1                | 0.931140                | -1.242636 | -0.000000 |
| 6                | 0.000000                | 0.666610  | -0.000000 |
| 1                | 0.931140                | 1.242636  | -0.000000 |
| 1                | -0.931140               | 1.242636  | -0.000000 |

---

**Table S5**  
**B3LYP-D3/def2-SVP**  
**Ph<sub>2</sub>CO**  
**G = -576.083392 Hartree**

| Atomic<br>Number | Coordinates (Angstroms) |           |           |
|------------------|-------------------------|-----------|-----------|
|                  | X                       | Y         | Z         |
| 8                | 0.000009                | 2.311371  | 0.000027  |
| 6                | -0.000029               | 1.091668  | 0.000028  |
| 6                | 1.303084                | 0.341876  | 0.024646  |
| 6                | 1.450816                | -0.916462 | 0.633242  |
| 1                | 0.588044                | -1.406450 | 1.088286  |
| 6                | -1.303139               | 0.341955  | -0.024595 |
| 6                | -1.450762               | -0.916443 | -0.633216 |
| 1                | -0.587905               | -1.406287 | -1.088271 |
| 6                | 2.704757                | -1.531448 | 0.687139  |
| 1                | 2.812073                | -2.504146 | 1.173763  |
| 6                | -3.818825               | -0.902164 | -0.124002 |
| 1                | -4.797219               | -1.388461 | -0.158956 |
| 6                | -3.681853               | 0.355520  | 0.476861  |
| 1                | -4.553326               | 0.852189  | 0.910931  |
| 6                | -2.704625               | -1.531436 | -0.687174 |
| 1                | -2.811940               | -2.504163 | -1.173742 |
| 6                | -2.435456               | 0.978662  | 0.513771  |
| 1                | -2.312176               | 1.969500  | 0.955640  |
| 6                | 3.818854                | -0.902114 | 0.123985  |
| 1                | 4.797301                | -1.388305 | 0.158914  |
| 6                | 3.681768                | 0.355621  | -0.476888 |
| 1                | 4.553210                | 0.852266  | -0.911050 |
| 6                | 2.435392                | 0.978669  | -0.513803 |
| 1                | 2.311979                | 1.969473  | -0.955700 |

**Table S6**  
**B3LYP-D3/def2-SVP**

Rea-C (Singlet)

E = -1926.83192151 Hartree

G = -1926.026270 Hartree

| Atomic<br>Number | Coordinates (Angstroms) |           |           |
|------------------|-------------------------|-----------|-----------|
|                  | X                       | Y         | Z         |
| 6                | -1.631559               | 0.562513  | 0.197757  |
| 7                | -1.672509               | -0.557950 | 1.060600  |
| 7                | -2.952723               | 0.238524  | -0.214644 |
| 6                | -3.580629               | -0.563091 | -2.472343 |
| 1                | -2.533433               | -0.664077 | -2.785640 |
| 1                | -4.189071               | -0.337829 | -3.362524 |
| 1                | -3.913737               | -1.527127 | -2.062981 |
| 6                | 0.000059                | 2.581941  | -0.000029 |
| 6                | -5.200126               | 0.759427  | -1.057433 |
| 1                | -5.659603               | -0.182064 | -0.732690 |
| 1                | -5.763486               | 1.123020  | -1.930940 |
| 1                | -5.298913               | 1.497290  | -0.246712 |
| 6                | -3.197352               | 1.878067  | -2.042226 |
| 1                | -3.366189               | 2.734290  | -1.376893 |
| 1                | -3.727844               | 2.064251  | -2.988457 |
| 1                | -2.122917               | 1.825073  | -2.258014 |
| 6                | 0.163798                | -1.970571 | 1.895959  |
| 1                | -0.277312               | -2.888847 | 1.483876  |
| 1                | 0.753627                | -2.250845 | 2.782234  |
| 1                | 0.836413                | -1.535270 | 1.148146  |
| 6                | -1.052110               | 4.815172  | 0.503500  |
| 6                | -0.284630               | 0.288144  | 2.901423  |
| 1                | 0.416186                | 0.749358  | 2.195368  |
| 1                | 0.272464                | -0.000952 | 3.805802  |
| 1                | -1.043500               | 1.033999  | 3.177599  |
| 6                | -1.230002               | 1.967349  | 0.450385  |
| 6                | -1.907859               | -1.581644 | 3.279987  |
| 1                | -2.707932               | -0.873223 | 3.540524  |
| 1                | -1.360938               | -1.849817 | 4.197234  |
| 1                | -2.373513               | -2.494270 | 2.883970  |
| 6                | -2.877515               | -3.363344 | 0.274411  |
| 1                | -1.802660               | -3.295499 | 0.109209  |
| 6                | 0.000084                | 4.008372  | -0.000015 |
| 6                | -2.946818               | -0.880766 | 0.613686  |
| 6                | -3.610185               | -2.178799 | 0.514240  |
| 6                | -3.720397               | 0.566577  | -1.434146 |
| 6                | -0.929049               | -0.955114 | 2.274145  |
| 6                | -2.233328               | 2.790403  | 0.977513  |
| 1                | -3.142933               | 2.299362  | 1.332622  |
| 6                | -4.899478               | -4.699712 | 0.371819  |
| 1                | -5.397048               | -5.671039 | 0.315769  |
| 6                | -2.167681               | 4.202389  | 1.027534  |
| 1                | -2.997467               | 4.775967  | 1.449769  |
| 6                | -3.512418               | -4.604527 | 0.214167  |
| 1                | -2.920186               | -5.503873 | 0.024009  |
| 6                | -0.690696               | 6.279103  | 0.362302  |
| 1                | -0.629378               | 6.762636  | 1.352036  |
| 1                | -1.457114               | 6.832941  | -0.204603 |
| 6                | -5.005325               | -2.298173 | 0.695813  |

|   |           |           |           |
|---|-----------|-----------|-----------|
| 1 | -5.584374 | -1.406950 | 0.942533  |
| 6 | -5.641415 | -3.537082 | 0.610233  |
| 1 | -6.723548 | -3.598911 | 0.753913  |
| 6 | 1.631648  | 0.562486  | -0.197821 |
| 7 | 1.672405  | -0.558098 | -1.060479 |
| 7 | 2.952793  | 0.238438  | 0.214544  |
| 6 | 3.580803  | -0.563198 | 2.472220  |
| 1 | 2.533600  | -0.664274 | 2.785471  |
| 1 | 4.189190  | -0.337884 | 3.362424  |
| 1 | 3.914008  | -1.527207 | 2.062878  |
| 6 | 5.200206  | 0.759407  | 1.057266  |
| 1 | 5.659674  | -0.182038 | 0.732380  |
| 1 | 5.763612  | 1.122906  | 1.930783  |
| 1 | 5.298932  | 1.497370  | 0.246628  |
| 6 | 3.197435  | 1.877944  | 2.042179  |
| 1 | 3.366242  | 2.734198  | 1.376882  |
| 1 | 3.727940  | 2.064106  | 2.988407  |
| 1 | 2.123004  | 1.824907  | 2.257980  |
| 6 | -0.164045 | -1.970512 | -1.895871 |
| 1 | 0.276912  | -2.888741 | -1.483518 |
| 1 | -0.753744 | -2.250912 | -2.782190 |
| 1 | -0.836759 | -1.535001 | -1.148267 |
| 6 | 1.052306  | 4.815152  | -0.503508 |
| 6 | 0.284790  | 0.288067  | -2.901501 |
| 1 | -0.416088 | 0.749392  | -2.195586 |
| 1 | -0.272186 | -0.001021 | -3.805955 |
| 1 | 1.043785  | 1.033824  | -3.177600 |
| 6 | 1.230107  | 1.967307  | -0.450443 |
| 6 | 1.907770  | -1.581986 | -3.279767 |
| 1 | 2.707916  | -0.873673 | -3.540372 |
| 1 | 1.360870  | -1.850249 | -4.197000 |
| 1 | 2.373330  | -2.494592 | -2.883589 |
| 6 | 2.877293  | -3.363551 | -0.274566 |
| 1 | 1.802416  | -3.295682 | -0.109530 |
| 6 | 2.946743  | -0.880957 | -0.613650 |
| 6 | 3.610039  | -2.179013 | -0.514192 |
| 6 | 3.720503  | 0.566490  | 1.434037  |
| 6 | 0.928966  | -0.955228 | -2.274060 |
| 6 | 2.233455  | 2.790348  | -0.977567 |
| 1 | 3.143038  | 2.299293  | -1.332709 |
| 6 | 4.899227  | -4.699983 | -0.371748 |
| 1 | 5.396754  | -5.671332 | -0.315679 |
| 6 | 2.167855  | 4.202338  | -1.027551 |
| 1 | 2.997660  | 4.775891  | -1.449782 |
| 6 | 3.512146  | -4.604760 | -0.214309 |
| 1 | 2.919854  | -5.504099 | -0.024303 |
| 6 | 0.690934  | 6.279091  | -0.362283 |
| 1 | 0.629628  | 6.762643  | -1.352008 |
| 1 | 1.457367  | 6.832899  | 0.204632  |
| 6 | 5.005205  | -2.298427 | -0.695575 |
| 1 | 5.584322  | -1.407211 | -0.942161 |
| 6 | 5.641239  | -3.537362 | -0.609978 |
| 1 | 6.723392  | -3.599217 | -0.753502 |

**Table S7**  
**B3LYP-D3/def2-SVP**

Rea-C (Triplet)

E = -1926.78459137 Hartree

G = -1925.983833 Hartree

| Atomic<br>Number | Coordinates (Angstroms) |           |           |
|------------------|-------------------------|-----------|-----------|
|                  | X                       | Y         | Z         |
| 6                | -1.424669               | -1.262277 | 0.350060  |
| 7                | -0.096975               | -1.402594 | 0.843642  |
| 7                | -1.494106               | -2.648639 | -0.005141 |
| 6                | -1.120436               | -3.957087 | -2.106723 |
| 1                | -0.418720               | -3.194331 | -2.470905 |
| 1                | -1.641369               | -4.387830 | -2.975036 |
| 1                | -0.539870               | -4.758148 | -1.635982 |
| 6                | -2.401755               | 1.141194  | 0.058069  |
| 6                | -3.093615               | -4.423202 | -0.596947 |
| 1                | -2.535860               | -5.152647 | 0.007274  |
| 1                | -3.587600               | -4.967612 | -1.417153 |
| 1                | -3.875102               | -3.980525 | 0.038378  |
| 6                | -3.002344               | -2.347001 | -1.998005 |
| 1                | -3.827055               | -1.899873 | -1.432827 |
| 1                | -3.431361               | -2.898665 | -2.847862 |
| 1                | -2.382703               | -1.536322 | -2.399165 |
| 6                | 1.733365                | -0.432269 | 2.200244  |
| 1                | 2.468822                | -1.169811 | 1.855649  |
| 1                | 2.044130                | -0.104166 | 3.204472  |
| 1                | 1.758999                | 0.426587  | 1.522583  |
| 6                | -4.926535               | 1.163066  | 0.331602  |
| 6                | -0.654067               | 0.008617  | 2.826416  |
| 1                | -0.754254               | 0.864544  | 2.153911  |
| 1                | -0.264492               | 0.366667  | 3.791400  |
| 1                | -1.651777               | -0.418641 | 2.995779  |
| 6                | -2.456963               | -0.298911 | 0.379815  |
| 6                | 0.297437                | -2.259759 | 3.178645  |
| 1                | -0.681688               | -2.762491 | 3.142592  |
| 1                | 0.472552                | -1.929658 | 4.214351  |
| 1                | 1.072147                | -2.993787 | 2.924509  |
| 6                | 2.201603                | -3.491729 | 0.434943  |
| 1                | 2.511286                | -2.454735 | 0.314050  |
| 6                | -3.683049               | 1.779982  | 0.013857  |
| 6                | -0.152439               | -2.764394 | 0.428755  |
| 6                | 0.803708                | -3.796643 | 0.468688  |
| 6                | -2.165691               | -3.331717 | -1.160978 |
| 6                | 0.321806                | -1.026360 | 2.254120  |
| 6                | -3.737542               | -0.874351 | 0.703520  |
| 1                | -3.742732               | -1.921888 | 1.007642  |
| 6                | 2.771937                | -5.848263 | 0.597407  |
| 1                | 3.526661                | -6.636027 | 0.646708  |
| 6                | -4.940977               | -0.175067 | 0.699018  |
| 1                | -5.866907               | -0.680900 | 0.986560  |
| 6                | 3.153503                | -4.498405 | 0.495059  |
| 1                | 4.213689                | -4.234671 | 0.449065  |
| 6                | -6.055538               | 2.158802  | 0.201491  |
| 1                | -6.570636               | 2.306561  | 1.167205  |
| 1                | -6.827832               | 1.807737  | -0.504672 |
| 6                | 0.435802                | -5.175311 | 0.572280  |



|   |           |           |           |
|---|-----------|-----------|-----------|
| 1 | -0.618659 | -5.441826 | 0.645091  |
| 6 | 1.403428  | -6.167970 | 0.635833  |
| 1 | 1.091934  | -7.211881 | 0.730397  |
| 6 | 0.145602  | 1.686911  | -0.148838 |
| 7 | 1.082859  | 1.124026  | -1.044902 |
| 7 | 1.127396  | 2.617146  | 0.253422  |
| 6 | 2.442568  | 3.236875  | 2.268868  |
| 1 | 2.272439  | 2.261120  | 2.741899  |
| 1 | 2.538958  | 3.992565  | 3.063963  |
| 1 | 3.394889  | 3.193597  | 1.726089  |
| 6 | 1.505323  | 4.995333  | 0.721087  |
| 1 | 2.413339  | 5.004643  | 0.104122  |
| 1 | 1.623095  | 5.751581  | 1.512791  |
| 1 | 0.656474  | 5.290975  | 0.087599  |
| 6 | -0.014709 | 3.661423  | 2.195928  |
| 1 | -0.887892 | 3.985235  | 1.617516  |
| 1 | 0.141130  | 4.380386  | 3.014345  |
| 1 | -0.238598 | 2.685491  | 2.640956  |
| 6 | 1.439471  | -1.008601 | -2.269852 |
| 1 | 2.516122  | -1.059610 | -2.062257 |
| 1 | 1.260706  | -1.529488 | -3.223430 |
| 1 | 0.913145  | -1.543365 | -1.472673 |
| 6 | -3.896246 | 3.128429  | -0.362301 |
| 6 | -0.513664 | 0.466823  | -2.808848 |
| 1 | -1.157203 | -0.024851 | -2.070713 |
| 1 | -0.611090 | -0.073598 | -3.762629 |
| 1 | -0.881985 | 1.492096  | -2.947645 |
| 6 | -1.289665 | 1.993219  | -0.287253 |
| 6 | 1.799208  | 1.206387  | -3.399658 |
| 1 | 1.472822  | 2.253437  | -3.480372 |
| 1 | 1.687882  | 0.724230  | -4.383991 |
| 1 | 2.865563  | 1.199089  | -3.135372 |
| 6 | 4.086892  | 0.611486  | -0.508259 |
| 1 | 3.438300  | -0.256363 | -0.397575 |
| 6 | 2.047814  | 2.044056  | -0.624858 |
| 6 | 3.495235  | 1.893745  | -0.587856 |
| 6 | 1.264341  | 3.607060  | 1.346789  |
| 6 | 0.952784  | 0.448126  | -2.361872 |
| 6 | -1.547990 | 3.315173  | -0.718445 |
| 1 | -0.688732 | 3.907343  | -1.036820 |
| 6 | 6.315562  | 1.564526  | -0.593856 |
| 1 | 7.401064  | 1.439375  | -0.596958 |
| 6 | -2.820711 | 3.901645  | -0.753421 |
| 1 | -2.945193 | 4.934929  | -1.089247 |
| 6 | 5.472410  | 0.450093  | -0.524009 |
| 1 | 5.897844  | -0.555257 | -0.457709 |
| 6 | -5.369446 | 3.468859  | -0.290336 |
| 1 | -5.749364 | 3.785338  | -1.276737 |
| 1 | -5.552234 | 4.313825  | 0.394745  |
| 6 | 4.364078  | 3.006013  | -0.673900 |
| 1 | 3.940270  | 4.006074  | -0.776642 |
| 6 | 5.748864  | 2.843507  | -0.661279 |
| 1 | 6.394286  | 3.723772  | -0.726436 |

**Table S8**  
**B3LYP-D3/def2-SVP**

Rea-Si (Singlet)

E = -2429.68331488 Hartree

G = -2428.896504 Hartree

| Atomic<br>Number | Coordinates (Angstroms) |           |           |
|------------------|-------------------------|-----------|-----------|
|                  | X                       | Y         | Z         |
| 14               | -1.288416               | 0.080605  | -0.402569 |
| 7                | -2.367645               | -0.704330 | 0.959330  |
| 7                | -3.133923               | -0.158964 | -0.982089 |
| 6                | -3.582280               | -1.633238 | -2.928973 |
| 1                | -2.522778               | -1.933907 | -2.927687 |
| 1                | -3.948979               | -1.651785 | -3.968086 |
| 1                | -4.155976               | -2.375059 | -2.354277 |
| 6                | 0.000003                | 2.627233  | -0.000006 |
| 6                | -5.214330               | 0.194927  | -2.308679 |
| 1                | -5.843891               | -0.545105 | -1.797980 |
| 1                | -5.586378               | 0.295378  | -3.340677 |
| 1                | -5.334328               | 1.166230  | -1.803942 |
| 6                | -2.951090               | 0.784695  | -3.191276 |
| 1                | -3.027585               | 1.799361  | -2.773447 |
| 1                | -3.347251               | 0.793553  | -4.218350 |
| 1                | -1.883819               | 0.517620  | -3.237082 |
| 6                | -1.223433               | -2.263603 | 2.459537  |
| 1                | -1.685189               | -3.141337 | 1.979726  |
| 1                | -1.004033               | -2.518480 | 3.509073  |
| 1                | -0.275607               | -2.036932 | 1.946935  |
| 6                | -1.174273               | 4.828558  | 0.003565  |
| 6                | -1.521468               | 0.170410  | 3.066839  |
| 1                | -0.569660               | 0.427705  | 2.582399  |
| 1                | -1.325702               | -0.049010 | 4.128675  |
| 1                | -2.184175               | 1.046580  | 3.001771  |
| 6                | -1.276677               | 1.965231  | -0.045404 |
| 6                | -3.479219               | -1.366580 | 3.126032  |
| 1                | -4.210699               | -0.552472 | 3.013858  |
| 1                | -3.254246               | -1.474379 | 4.198179  |
| 1                | -3.947426               | -2.299869 | 2.789618  |
| 6                | -4.461617               | -3.098906 | 0.266931  |
| 1                | -3.484735               | -3.518831 | 0.015884  |
| 6                | 0.000003                | 4.040566  | -0.000012 |
| 6                | -3.419343               | -0.832586 | 0.138213  |
| 6                | -4.606124               | -1.706546 | 0.366496  |
| 6                | -3.732001               | -0.222327 | -2.326288 |
| 6                | -2.169726               | -1.050374 | 2.381644  |
| 6                | -2.422487               | 2.762454  | -0.033109 |
| 1                | -3.399583               | 2.271404  | -0.077902 |
| 6                | -6.799815               | -3.394145 | 0.824652  |
| 1                | -7.654341               | -4.051072 | 1.005341  |
| 6                | -2.396015               | 4.186683  | 0.002784  |
| 1                | -3.336045               | 4.746774  | 0.008949  |
| 6                | -5.555144               | -3.938708 | 0.490810  |
| 1                | -5.434746               | -5.021838 | 0.408342  |
| 6                | -0.783562               | 6.294846  | 0.006407  |
| 1                | -1.182304               | 6.811981  | 0.895430  |
| 1                | -1.198244               | 6.822729  | -0.868803 |
| 6                | -5.856613               | -1.166387 | 0.695840  |

|    |           |           |           |
|----|-----------|-----------|-----------|
| 1  | -5.967544 | -0.083119 | 0.778811  |
| 6  | -6.947814 | -2.007100 | 0.928011  |
| 1  | -7.917414 | -1.577773 | 1.192226  |
| 14 | 1.288416  | 0.080607  | 0.402583  |
| 7  | 2.367638  | -0.704350 | -0.959305 |
| 7  | 3.133926  | -0.158968 | 0.982109  |
| 6  | 3.582187  | -1.633297 | 2.928981  |
| 1  | 2.522674  | -1.933925 | 2.927668  |
| 1  | 3.948864  | -1.651875 | 3.968101  |
| 1  | 4.155867  | -2.375130 | 2.354285  |
| 6  | 5.214322  | 0.194815  | 2.308750  |
| 1  | 5.843869  | -0.545236 | 1.798060  |
| 1  | 5.586348  | 0.295242  | 3.340758  |
| 1  | 5.334371  | 1.166119  | 1.804026  |
| 6  | 2.951089  | 0.784657  | 3.191309  |
| 1  | 3.027635  | 1.799327  | 2.773498  |
| 1  | 3.347229  | 0.793482  | 4.218391  |
| 1  | 1.883806  | 0.517626  | 3.237089  |
| 6  | 1.223457  | -2.263675 | -2.459475 |
| 1  | 1.685243  | -3.141388 | -1.979653 |
| 1  | 1.004054  | -2.518575 | -3.509004 |
| 1  | 0.275630  | -2.037021 | -1.946868 |
| 6  | 1.174281  | 4.828556  | -0.003597 |
| 6  | 1.521420  | 0.170339  | -3.066817 |
| 1  | 0.569611  | 0.427620  | -2.582372 |
| 1  | 1.325647  | -0.049105 | -4.128647 |
| 1  | 2.184105  | 1.046527  | -3.001772 |
| 6  | 1.276681  | 1.965230  | 0.045398  |
| 6  | 3.479218  | -1.366606 | -3.125993 |
| 1  | 4.210666  | -0.552463 | -3.013858 |
| 1  | 3.254244  | -1.474461 | -4.198134 |
| 1  | 3.947464  | -2.299861 | -2.789538 |
| 6  | 4.461637  | -3.098879 | -0.267044 |
| 1  | 3.484751  | -3.518825 | -0.016050 |
| 6  | 3.419353  | -0.832569 | -0.138205 |
| 6  | 4.606142  | -1.706512 | -0.366512 |
| 6  | 3.731977  | -0.222383 | 2.326320  |
| 6  | 2.169717  | -1.050418 | -2.381610 |
| 6  | 2.422492  | 2.762451  | 0.033096  |
| 1  | 3.399587  | 2.271400  | 0.077894  |
| 6  | 6.799849  | -3.394072 | -0.824732 |
| 1  | 7.654382  | -4.050984 | -1.005447 |
| 6  | 2.396022  | 4.186680  | -0.002809 |
| 1  | 3.336052  | 4.746769  | -0.008978 |
| 6  | 5.555173  | -3.938662 | -0.490956 |
| 1  | 5.434776  | -5.021798 | -0.408562 |
| 6  | 0.783572  | 6.294844  | -0.006451 |
| 1  | 1.182314  | 6.811972  | -0.895479 |
| 1  | 1.198254  | 6.822735  | 0.868755  |
| 6  | 5.856634  | -1.166326 | -0.695798 |
| 1  | 5.967564  | -0.083053 | -0.778698 |
| 6  | 6.947844  | -2.007020 | -0.928000 |
| 1  | 7.917448  | -1.577672 | -1.192167 |

**Table S9**  
**B3LYP-D3/def2-SVP**

Rea-Si(Triplet)

E = -2429.65217020 Hartree

G = -2428.862471 Hartree

| Atomic<br>Number | Coordinates (Angstroms) |           |           |
|------------------|-------------------------|-----------|-----------|
|                  | X                       | Y         | Z         |
| 14               | 1.212818                | 0.543134  | -0.167103 |
| 7                | 1.969049                | -0.553811 | -1.379131 |
| 7                | 2.377208                | -0.423771 | 0.802698  |
| 6                | 3.572996                | -1.088638 | 2.903261  |
| 1                | 2.607510                | -1.429254 | 3.307736  |
| 1                | 4.174679                | -0.690381 | 3.735814  |
| 1                | 4.103848                | -1.956029 | 2.492903  |
| 6                | 0.218690                | 3.130165  | 0.091688  |
| 6                | 4.706283                | 0.367192  | 1.188969  |
| 1                | 5.150668                | -0.502013 | 0.683746  |
| 1                | 5.417383                | 0.722622  | 1.951902  |
| 1                | 4.572994                | 1.167808  | 0.444824  |
| 6                | 2.794941                | 1.252354  | 2.549927  |
| 1                | 2.695867                | 2.105108  | 1.865154  |
| 1                | 3.472754                | 1.552982  | 3.363459  |
| 1                | 1.808006                | 1.053707  | 2.992426  |
| 6                | 0.272259                | -2.261334 | -2.024655 |
| 1                | 0.787703                | -3.028701 | -1.427580 |
| 1                | -0.228811               | -2.758366 | -2.871220 |
| 1                | -0.503518               | -1.799212 | -1.394758 |
| 6                | 1.438346                | 5.251132  | -0.313097 |
| 6                | 0.549880                | -0.080000 | -3.277483 |
| 1                | -0.169953               | 0.433019  | -2.623292 |
| 1                | -0.004474               | -0.486717 | -4.137391 |
| 1                | 1.269147                | 0.668758  | -3.642202 |
| 6                | 1.374204                | 2.404427  | -0.357306 |
| 6                | 2.255367                | -1.867468 | -3.510142 |
| 1                | 3.058953                | -1.169394 | -3.789518 |
| 1                | 1.710998                | -2.149854 | -4.425453 |
| 1                | 2.708431                | -2.775907 | -3.095825 |
| 6                | 3.359946                | -3.393645 | 0.626722  |
| 1                | 2.595819                | -3.268144 | 1.394544  |
| 6                | 0.299341                | 4.531077  | 0.113061  |
| 6                | 2.693779                | -1.199948 | -0.341062 |
| 6                | 3.492329                | -2.390544 | -0.379926 |
| 6                | 3.356654                | 0.005642  | 1.839763  |
| 6                | 1.281156                | -1.203193 | -2.522426 |
| 6                | 2.484614                | 3.125600  | -0.792268 |
| 1                | 3.364686                | 2.580907  | -1.148633 |
| 6                | 5.101317                | -4.747751 | -0.394833 |
| 1                | 5.717061                | -5.650090 | -0.401488 |
| 6                | 2.533970                | 4.549185  | -0.781647 |
| 1                | 3.433236                | 5.062097  | -1.133707 |
| 6                | 4.144462                | -4.541226 | 0.612274  |
| 1                | 3.999429                | -5.298330 | 1.388774  |
| 6                | 1.159350                | 6.734861  | -0.158574 |
| 1                | 1.239830                | 7.255795  | -1.127365 |
| 1                | 1.896263                | 7.211335  | 0.509292  |
| 6                | 4.476622                | -2.617075 | -1.387374 |

|    |           |           |           |
|----|-----------|-----------|-----------|
| 1  | 4.651541  | -1.845088 | -2.137132 |
| 6  | 5.255852  | -3.768603 | -1.389761 |
| 1  | 6.013624  | -3.899514 | -2.168076 |
| 14 | -1.030683 | 0.685682  | 0.272110  |
| 7  | -1.822575 | -0.703106 | 1.253999  |
| 7  | -2.651693 | 0.122855  | -0.556804 |
| 6  | -3.410428 | -0.581782 | -2.815533 |
| 1  | -2.364840 | -0.793677 | -3.083122 |
| 1  | -3.935947 | -0.239200 | -3.720712 |
| 1  | -3.883773 | -1.516382 | -2.486451 |
| 6  | -4.934026 | 0.750371  | -1.296131 |
| 1  | -5.423398 | -0.172033 | -0.955963 |
| 1  | -5.512087 | 1.144105  | -2.146726 |
| 1  | -4.973964 | 1.491038  | -0.482040 |
| 6  | -2.905106 | 1.815400  | -2.293528 |
| 1  | -2.950598 | 2.627217  | -1.555679 |
| 1  | -3.488517 | 2.112536  | -3.178105 |
| 1  | -1.856626 | 1.697847  | -2.600906 |
| 6  | -0.491440 | -2.746294 | 1.640665  |
| 1  | -1.100352 | -3.331619 | 0.935917  |
| 1  | -0.098592 | -3.435057 | 2.405171  |
| 1  | 0.363653  | -2.319052 | 1.098631  |
| 6  | -0.756364 | 5.379397  | 0.536319  |
| 6  | -0.437562 | -0.809965 | 3.239978  |
| 1  | 0.413445  | -0.387867 | 2.692345  |
| 1  | -0.038776 | -1.455426 | 4.037661  |
| 1  | -1.004734 | 0.012442  | 3.701953  |
| 6  | -1.037302 | 2.518371  | 0.484977  |
| 6  | -2.474352 | -2.248043 | 3.121667  |
| 1  | -3.161546 | -1.467946 | 3.483505  |
| 1  | -2.048491 | -2.762455 | 3.996942  |
| 1  | -3.053003 | -2.986734 | 2.553331  |
| 6  | -3.583248 | -3.095862 | -0.454451 |
| 1  | -2.662661 | -3.178922 | -1.035718 |
| 6  | -2.807925 | -0.856918 | 0.341347  |
| 6  | -3.816701 | -1.942404 | 0.313833  |
| 6  | -3.475533 | 0.504125  | -1.724472 |
| 6  | -1.329582 | -1.632836 | 2.297949  |
| 6  | -2.070234 | 3.373744  | 0.897797  |
| 1  | -3.032212 | 2.941035  | 1.191267  |
| 6  | -5.695640 | -4.028072 | 0.283299  |
| 1  | -6.426682 | -4.840009 | 0.272670  |
| 6  | -1.941619 | 4.791724  | 0.936938  |
| 1  | -2.790741 | 5.396145  | 1.269796  |
| 6  | -4.519815 | -4.131944 | -0.467562 |
| 1  | -4.327214 | -5.026526 | -1.064765 |
| 6  | -0.294817 | 6.820158  | 0.424493  |
| 1  | -0.304484 | 7.322423  | 1.406944  |
| 1  | -0.959262 | 7.410557  | -0.228911 |
| 6  | -4.999493 | -1.842603 | 1.066240  |
| 1  | -5.181115 | -0.948694 | 1.666540  |
| 6  | -5.932107 | -2.879914 | 1.048989  |
| 1  | -6.849348 | -2.792662 | 1.636512  |

**Table S10****B3LYP-D3/def2-SVP**

Rea-Ge (Singlet)

E = -6004.43256621 Hartree

G = -6003.654441 Hartree

| Atomic<br>Number | Coordinates (Angstroms) |           |           |
|------------------|-------------------------|-----------|-----------|
|                  | X                       | Y         | Z         |
| 32               | -1.434041               | -0.293719 | -0.556239 |
| 7                | -2.801677               | -0.743402 | 0.915275  |
| 7                | -3.418378               | -0.326796 | -1.135438 |
| 6                | -4.205326               | -1.865744 | -2.920623 |
| 1                | -3.235069               | -2.385254 | -2.880826 |
| 1                | -4.582195               | -1.911499 | -3.955325 |
| 1                | -4.915327               | -2.406338 | -2.278051 |
| 6                | -0.000010               | 2.336045  | -0.000045 |
| 6                | -5.407395               | 0.317300  | -2.502783 |
| 1                | -6.170948               | -0.215998 | -1.922085 |
| 1                | -5.765404               | 0.385360  | -3.542474 |
| 1                | -5.315279               | 1.339777  | -2.104432 |
| 6                | -3.085465               | 0.327310  | -3.423721 |
| 1                | -2.940283               | 1.371415  | -3.107649 |
| 1                | -3.486731               | 0.322011  | -4.448792 |
| 1                | -2.099274               | -0.163574 | -3.442486 |
| 6                | -2.136346               | -2.454359 | 2.537370  |
| 1                | -2.831466               | -3.199586 | 2.119689  |
| 1                | -1.988146               | -2.681448 | 3.605619  |
| 1                | -1.167869               | -2.553871 | 2.023356  |
| 6                | -1.163434               | 4.556257  | -0.122832 |
| 6                | -1.704890               | -0.005755 | 2.940679  |
| 1                | -0.722221               | -0.087253 | 2.453788  |
| 1                | -1.565726               | -0.181464 | 4.019034  |
| 1                | -2.072844               | 1.019945  | 2.789735  |
| 6                | -1.278734               | 1.698747  | -0.198692 |
| 6                | -4.028392               | -0.889925 | 3.114850  |
| 1                | -4.497207               | 0.084528  | 2.911512  |
| 1                | -3.829421               | -0.953933 | 4.195882  |
| 1                | -4.747988               | -1.678715 | 2.862535  |
| 6                | -5.354952               | -2.744601 | 0.380126  |
| 1                | -4.512186               | -3.404692 | 0.162360  |
| 6                | -0.000013               | 3.759902  | -0.000096 |
| 6                | -3.814103               | -0.793792 | 0.053719  |
| 6                | -5.167478               | -1.354945 | 0.351804  |
| 6                | -4.044273               | -0.402213 | -2.463646 |
| 6                | -2.696471               | -1.030128 | 2.353785  |
| 6                | -2.410467               | 2.507635  | -0.305220 |
| 1                | -3.380161               | 2.025557  | -0.456770 |
| 6                | -7.682620               | -2.431159 | 0.972795  |
| 1                | -8.662066               | -2.850017 | 1.217020  |
| 6                | -2.382405               | 3.928518  | -0.257642 |
| 1                | -3.313458               | 4.496158  | -0.348901 |
| 6                | -6.608844               | -3.280231 | 0.685788  |
| 1                | -6.747077               | -4.364213 | 0.703259  |
| 6                | -0.778501               | 6.022142  | -0.073384 |
| 1                | -1.266859               | 6.532142  | 0.774131  |
| 1                | -1.105191               | 6.554007  | -0.982664 |
| 6                | -6.248445               | -0.508497 | 0.634321  |

|    |           |           |           |
|----|-----------|-----------|-----------|
| 1  | -6.099983 | 0.573344  | 0.617192  |
| 6  | -7.499672 | -1.044393 | 0.946784  |
| 1  | -8.335250 | -0.377232 | 1.172655  |
| 32 | 1.434052  | -0.293684 | 0.556347  |
| 7  | 2.801632  | -0.743470 | -0.915202 |
| 7  | 3.418429  | -0.326701 | 1.135451  |
| 6  | 4.205768  | -1.865433 | 2.920656  |
| 1  | 3.235590  | -2.385102 | 2.880986  |
| 1  | 4.582746  | -1.911064 | 3.955323  |
| 1  | 4.915793  | -2.405953 | 2.278048  |
| 6  | 5.407439  | 0.317785  | 2.502589  |
| 1  | 6.171002  | -0.215377 | 1.921779  |
| 1  | 5.765576  | 0.385889  | 3.542233  |
| 1  | 5.315100  | 1.340254  | 2.104268  |
| 6  | 3.085584  | 0.327462  | 3.423738  |
| 1  | 2.940192  | 1.371523  | 3.107618  |
| 1  | 3.486948  | 0.322296  | 4.448770  |
| 1  | 2.099480  | -0.163593 | 3.442624  |
| 6  | 2.136106  | -2.454516 | -2.537128 |
| 1  | 2.831173  | -3.199771 | -2.119407 |
| 1  | 1.987852  | -2.681682 | -3.605353 |
| 1  | 1.167637  | -2.553897 | -2.023075 |
| 6  | 1.163406  | 4.556271  | 0.122578  |
| 6  | 1.704875  | -0.005903 | -2.940653 |
| 1  | 0.722213  | -0.087240 | -2.453722 |
| 1  | 1.565659  | -0.181707 | -4.018985 |
| 1  | 2.072946  | 1.019773  | -2.789826 |
| 6  | 1.278715  | 1.698762  | 0.198645  |
| 6  | 4.028287  | -0.890310 | -3.114785 |
| 1  | 4.497198  | 0.084118  | -2.911546 |
| 1  | 3.829288  | -0.954398 | -4.195807 |
| 1  | 4.747814  | -1.679144 | -2.862414 |
| 6  | 5.354909  | -2.744651 | -0.379947 |
| 1  | 4.512148  | -3.404708 | -0.162062 |
| 6  | 3.814096  | -0.793792 | -0.053685 |
| 6  | 5.167451  | -1.354990 | -0.351775 |
| 6  | 4.044430  | -0.401955 | 2.463616  |
| 6  | 2.696366  | -1.030321 | -2.353682 |
| 6  | 2.410445  | 2.507664  | 0.305109  |
| 1  | 3.380141  | 2.025600  | 0.456682  |
| 6  | 7.682554  | -2.431302 | -0.972757 |
| 1  | 8.661984  | -2.850198 | -1.216980 |
| 6  | 2.382378  | 3.928543  | 0.257428  |
| 1  | 3.313431  | 4.496192  | 0.348641  |
| 6  | 6.608781  | -3.280329 | -0.685606 |
| 1  | 6.747001  | -4.364315 | -0.702962 |
| 6  | 0.778468  | 6.022150  | 0.073023  |
| 1  | 1.266824  | 6.532089  | -0.774529 |
| 1  | 1.105157  | 6.554083  | 0.982264  |
| 6  | 6.248416  | -0.508585 | -0.634427 |
| 1  | 6.099966  | 0.573259  | -0.617412 |
| 6  | 7.499623  | -1.044531 | -0.946888 |
| 1  | 8.335199  | -0.377404 | -1.172869 |

**Table S11****B3LYP-D3/def2-SVP**

Rea-Ge (Triplet)

E = -6004.35784949 Hartree

G = -6003.581508 Hartree

| Atomic<br>Number | Coordinates (Angstroms) |           |           |
|------------------|-------------------------|-----------|-----------|
|                  | X                       | Y         | Z         |
| 32               | -1.216853               | 0.127357  | -0.462399 |
| 7                | -2.455762               | -0.656484 | 0.943478  |
| 7                | -3.078571               | -0.473241 | -1.141597 |
| 6                | -3.415548               | -2.227749 | -2.856658 |
| 1                | -2.352393               | -2.504542 | -2.774401 |
| 1                | -3.742319               | -2.414605 | -3.892373 |
| 1                | -3.998471               | -2.883574 | -2.193356 |
| 6                | -0.000014               | 2.688304  | 0.000017  |
| 6                | -5.098684               | -0.357747 | -2.603977 |
| 1                | -5.747575               | -1.028918 | -2.027073 |
| 1                | -5.413580               | -0.411130 | -3.658147 |
| 1                | -5.256637               | 0.672710  | -2.249765 |
| 6                | -2.801437               | 0.136599  | -3.453209 |
| 1                | -2.893014               | 1.198789  | -3.180213 |
| 1                | -3.163575               | 0.003077  | -4.484185 |
| 1                | -1.732841               | -0.127616 | -3.426852 |
| 6                | -1.525600               | -2.023382 | 2.745778  |
| 1                | -2.028177               | -2.936005 | 2.388067  |
| 1                | -1.376895               | -2.113935 | 3.833862  |
| 1                | -0.537270               | -1.959148 | 2.264059  |
| 6                | -1.160395               | 4.890059  | -0.199257 |
| 6                | -1.654478               | 0.490714  | 2.924450  |
| 1                | -0.647957               | 0.592722  | 2.490341  |
| 1                | -1.542931               | 0.446778  | 4.019152  |
| 1                | -2.224559               | 1.392951  | 2.658689  |
| 6                | -1.253059               | 2.047121  | -0.302309 |
| 6                | -3.733302               | -0.866922 | 3.113756  |
| 1                | -4.385590               | -0.031699 | 2.818829  |
| 1                | -3.575132               | -0.806600 | 4.201639  |
| 1                | -4.259402               | -1.807007 | 2.905359  |
| 6                | -4.599308               | -3.100810 | 0.485009  |
| 1                | -3.644980               | -3.612813 | 0.341389  |
| 6                | -0.000022               | 4.108907  | 0.000034  |
| 6                | -3.416191               | -0.938064 | 0.064267  |
| 6                | -4.658436               | -1.703143 | 0.368296  |
| 6                | -3.611806               | -0.745395 | -2.484460 |
| 6                | -2.367306               | -0.776359 | 2.410560  |
| 6                | -2.412275               | 2.841229  | -0.480096 |
| 1                | -3.363003               | 2.344319  | -0.696466 |
| 6                | -6.968365               | -3.169466 | 0.988581  |
| 1                | -7.868327               | -3.739651 | 1.231568  |
| 6                | -2.376982               | 4.248774  | -0.420874 |
| 1                | -3.297997               | 4.820930  | -0.571003 |
| 6                | -5.751444               | -3.830164 | 0.789034  |
| 1                | -5.697619               | -4.918287 | 0.875629  |
| 6                | -0.779002               | 6.356400  | -0.098442 |
| 1                | -1.288498               | 6.842856  | 0.752580  |
| 1                | -1.077901               | 6.923221  | -0.996980 |
| 6                | -5.882163               | -1.045161 | 0.563077  |



|    |           |           |           |
|----|-----------|-----------|-----------|
| 1  | -5.926521 | 0.042219  | 0.473097  |
| 6  | -7.029556 | -1.775221 | 0.876264  |
| 1  | -7.977257 | -1.254306 | 1.033543  |
| 32 | 1.216848  | 0.127363  | 0.462378  |
| 7  | 2.455784  | -0.656433 | -0.943503 |
| 7  | 3.078556  | -0.473251 | 1.141589  |
| 6  | 3.415500  | -2.227770 | 2.856643  |
| 1  | 2.352340  | -2.504547 | 2.774383  |
| 1  | 3.742266  | -2.414636 | 3.892358  |
| 1  | 3.998414  | -2.883599 | 2.193338  |
| 6  | 5.098662  | -0.357789 | 2.603980  |
| 1  | 5.747546  | -1.028961 | 2.027068  |
| 1  | 5.413556  | -0.411190 | 3.658150  |
| 1  | 5.256629  | 0.672670  | 2.249782  |
| 6  | 2.801416  | 0.136584  | 3.453203  |
| 1  | 2.893012  | 1.198774  | 3.180214  |
| 1  | 3.163544  | 0.003049  | 4.484180  |
| 1  | 1.732816  | -0.127614 | 3.426835  |
| 6  | 1.525590  | -2.023167 | -2.745916 |
| 1  | 2.028079  | -2.935851 | -2.388237 |
| 1  | 1.376921  | -2.113647 | -3.834010 |
| 1  | 0.537247  | -1.958879 | -2.264231 |
| 6  | 1.160343  | 4.890067  | 0.199343  |
| 6  | 1.654698  | 0.490927  | -2.924467 |
| 1  | 0.648151  | 0.592989  | -2.490433 |
| 1  | 1.543234  | 0.447062  | -4.019181 |
| 1  | 2.224829  | 1.393104  | -2.658611 |
| 6  | 1.253038  | 2.047129  | 0.302331  |
| 6  | 3.733409  | -0.866875 | -3.113724 |
| 1  | 4.385800  | -0.031794 | -2.818617 |
| 1  | 3.575313  | -0.806350 | -4.201607 |
| 1  | 4.259360  | -1.807069 | -2.905452 |
| 6  | 4.599298  | -3.100820 | -0.485012 |
| 1  | 3.644972  | -3.612826 | -0.341388 |
| 6  | 3.416178  | -0.938075 | -0.064274 |
| 6  | 4.658424  | -1.703153 | -0.368301 |
| 6  | 3.611779  | -0.745416 | 2.484454  |
| 6  | 2.367386  | -0.776231 | -2.410594 |
| 6  | 2.412245  | 2.841246  | 0.480138  |
| 1  | 3.362979  | 2.344341  | 0.696501  |
| 6  | 6.968354  | -3.169471 | -0.988589 |
| 1  | 7.868318  | -3.739654 | -1.231578 |
| 6  | 2.376937  | 4.248792  | 0.420947  |
| 1  | 3.297945  | 4.820954  | 0.571090  |
| 6  | 5.751436  | -3.830172 | -0.789038 |
| 1  | 5.697613  | -4.918295 | -0.875631 |
| 6  | 0.778933  | 6.356406  | 0.098561  |
| 1  | 1.288423  | 6.842888  | -0.752451 |
| 1  | 1.077825  | 6.923211  | 0.997111  |
| 6  | 5.882148  | -1.045168 | -0.563087 |
| 1  | 5.926503  | 0.042212  | -0.473111 |
| 6  | 7.029542  | -1.775226 | -0.876275 |
| 1  | 7.977242  | -1.254309 | -1.033559 |

---

**Table S12****B3LYP-D3/def2-SVP**TS-C (with C<sub>2</sub>H<sub>4</sub>)1<sup>st</sup> frequency = -264.4 cm<sup>-1</sup>

G = -2004.442300 Hartree

| Atomic<br>Number | Coordinates (Angstroms) |           |           |
|------------------|-------------------------|-----------|-----------|
|                  | X                       | Y         | Z         |
| 6                | 1.460952                | -0.139306 | 0.169178  |
| 6                | -2.069357               | 0.600563  | -0.183537 |
| 6                | -0.042382               | 2.163749  | 0.271167  |
| 6                | -0.418854               | -1.445175 | -1.347880 |
| 1                | -1.482881               | -1.630290 | -1.261039 |
| 1                | 0.033960                | -1.636324 | -2.325387 |
| 6                | 1.106823                | 1.308017  | 0.583805  |
| 6                | 2.213747                | 1.924680  | 1.199895  |
| 1                | 3.072455                | 1.298229  | 1.424228  |
| 6                | 0.205878                | 3.573937  | 0.441164  |
| 7                | 2.455058                | -0.230987 | -0.929649 |
| 7                | -3.147480               | 0.157704  | -0.959056 |
| 6                | 3.297024                | -0.920874 | -0.126945 |
| 6                | 5.763076                | -1.218031 | 0.161861  |
| 1                | 5.776134                | -0.337231 | 0.806326  |
| 6                | 5.736337                | -3.427029 | -1.552601 |
| 1                | 5.721399                | -4.294765 | -2.216792 |
| 6                | 4.547751                | -2.753062 | -1.271173 |
| 1                | 3.603697                | -3.097413 | -1.697142 |
| 6                | 4.543907                | -1.639014 | -0.407245 |
| 6                | 2.565573                | -1.482845 | 2.285553  |
| 6                | -2.664795               | 0.040969  | 2.285285  |
| 6                | -3.453168               | 0.211240  | -2.418187 |
| 6                | 2.642004                | 0.425161  | -2.241902 |
| 6                | -1.591107               | 1.004576  | 2.806710  |
| 1                | -0.582984               | 0.678495  | 2.539587  |
| 1                | -1.658511               | 1.053935  | 3.904057  |
| 1                | -1.729950               | 2.019572  | 2.414712  |
| 7                | 2.562169                | -0.736753 | 1.007426  |
| 6                | -2.240667               | 2.953223  | -0.564530 |
| 1                | -3.263945               | 2.704329  | -0.841928 |
| 7                | -2.422654               | -0.309825 | 0.842011  |
| 6                | -1.878143               | 4.305617  | -0.531389 |
| 1                | -2.582145               | 5.074677  | -0.860739 |
| 6                | 1.435580                | 1.328778  | -2.529061 |
| 1                | 0.498492                | 0.789378  | -2.335696 |
| 1                | 1.460981                | 1.636444  | -3.585156 |
| 1                | 1.449546                | 2.233873  | -1.910004 |
| 6                | -1.406729               | 1.879723  | -0.173336 |
| 6                | -0.657024               | 4.621174  | 0.021660  |
| 6                | -4.302103               | -1.941861 | 0.103354  |
| 6                | -0.021966               | 5.969104  | 0.280413  |
| 6                | 0.389299                | -1.464431 | -0.172954 |
| 1                | 1.200612                | -2.222831 | -0.182876 |
| 1                | -0.214933               | -1.574637 | 0.735936  |
| 6                | -5.655489               | -1.935056 | -0.322935 |
| 1                | -6.086306               | -1.010173 | -0.710546 |
| 6                | -3.793115               | -3.152513 | 0.642730  |
| 1                | -2.739668               | -3.197027 | 0.923007  |

|   |           |           |           |
|---|-----------|-----------|-----------|
| 6 | -3.467939 | -0.777385 | 0.018589  |
| 6 | -4.600840 | -4.280964 | 0.762903  |
| 1 | -4.178211 | -5.201410 | 1.175926  |
| 6 | -6.447297 | -3.076910 | -0.223305 |
| 1 | -7.487184 | -3.039932 | -0.560129 |
| 6 | -5.932799 | -4.258075 | 0.328056  |
| 1 | -6.560065 | -5.148497 | 0.414253  |
| 6 | 6.940418  | -3.005576 | -0.975056 |
| 1 | 7.869722  | -3.537043 | -1.193925 |
| 6 | 6.948435  | -1.900006 | -0.117156 |
| 1 | 7.886479  | -1.558971 | 0.328096  |
| 6 | -2.296849 | 0.881132  | -3.174119 |
| 1 | -2.146134 | 1.924981  | -2.873925 |
| 1 | -2.520946 | 0.864071  | -4.251583 |
| 1 | -1.368665 | 0.325846  | -2.987625 |
| 6 | 1.408261  | -0.969271 | 3.146860  |
| 1 | 1.496101  | 0.110633  | 3.328815  |
| 1 | 1.413768  | -1.490168 | 4.115753  |
| 1 | 0.442510  | -1.162092 | 2.666943  |
| 6 | 3.891614  | -1.186343 | 3.014676  |
| 1 | 4.747887  | -1.634842 | 2.494792  |
| 1 | 3.857500  | -1.611853 | 4.029316  |
| 1 | 4.057532  | -0.101892 | 3.102996  |
| 6 | 2.751764  | -0.645013 | -3.345348 |
| 1 | 3.639050  | -1.276471 | -3.204438 |
| 1 | 2.841444  | -0.156268 | -4.327806 |
| 1 | 1.858079  | -1.284581 | -3.354617 |
| 6 | 3.930423  | 1.268562  | -2.193370 |
| 1 | 3.868033  | 2.011023  | -1.383143 |
| 1 | 4.063045  | 1.802291  | -3.147508 |
| 1 | 4.819160  | 0.640958  | -2.027208 |
| 6 | -3.642854 | -1.206749 | -2.992460 |
| 1 | -2.745768 | -1.819793 | -2.839485 |
| 1 | -3.827241 | -1.126713 | -4.074861 |
| 1 | -4.497459 | -1.727941 | -2.545762 |
| 6 | -4.751878 | 1.017502  | -2.611512 |
| 1 | -5.590129 | 0.560367  | -2.066463 |
| 1 | -5.017258 | 1.050960  | -3.679689 |
| 1 | -4.637651 | 2.052893  | -2.258729 |
| 6 | 2.434676  | -3.006358 | 2.080743  |
| 1 | 1.453865  | -3.279084 | 1.670824  |
| 1 | 2.555944  | -3.517108 | 3.049013  |
| 1 | 3.211531  | -3.380973 | 1.397926  |
| 6 | -4.038312 | 0.726699  | 2.420841  |
| 1 | -4.183549 | 1.081521  | 3.454097  |
| 1 | -4.857754 | 0.039034  | 2.168692  |
| 1 | -4.095795 | 1.596396  | 1.748074  |
| 6 | -2.637464 | -1.249474 | 3.118654  |
| 1 | -1.681363 | -1.779214 | 2.992382  |
| 1 | -3.447827 | -1.931967 | 2.834312  |
| 1 | -2.759884 | -1.005012 | 4.185345  |
| 6 | 2.348557  | 3.295182  | 1.486783  |
| 1 | 3.250817  | 3.663179  | 1.982641  |
| 6 | 1.356677  | 4.136585  | 1.053100  |
| 6 | 1.237099  | 5.641159  | 1.130074  |
| 1 | 2.144901  | 6.149284  | 0.766963  |
| 1 | 1.102031  | 5.956886  | 2.179681  |
| 1 | -0.709411 | 6.664530  | 0.788969  |
| 1 | 0.258825  | 6.451684  | -0.672930 |

**Table S13****B3LYP-D3/def2-SVP**TS-Si (with C<sub>2</sub>H<sub>4</sub>)1<sup>st</sup> frequency = -167.9 cm<sup>-1</sup>

G = -2507.375045 Hartree

| Atomic<br>Number | Coordinates (Angstroms) |           |           |
|------------------|-------------------------|-----------|-----------|
|                  | X                       | Y         | Z         |
| 14               | 1.185779                | -0.054070 | 0.471346  |
| 14               | -1.114117               | -0.163912 | -0.336036 |
| 6                | -0.026858               | 2.477912  | -0.108439 |
| 6                | -0.467975               | -2.666216 | 0.029604  |
| 1                | -1.483822               | -2.855462 | 0.385847  |
| 1                | -0.246611               | -3.055702 | -0.966862 |
| 6                | 1.198667                | 1.874073  | 0.362206  |
| 6                | 2.249330                | 2.725575  | 0.701470  |
| 1                | 3.184218                | 2.280675  | 1.053689  |
| 6                | -0.062792               | 3.890291  | -0.195874 |
| 7                | 2.424480                | -0.549632 | -0.874753 |
| 7                | -2.824463               | -0.608854 | -1.135581 |
| 6                | 3.425384                | -0.717144 | 0.006035  |
| 6                | 5.918601                | -0.624945 | -0.372123 |
| 1                | 5.885668                | 0.455762  | -0.219954 |
| 6                | 5.982012                | -3.388079 | -0.798199 |
| 1                | 6.003742                | -4.468289 | -0.962135 |
| 6                | 4.771605                | -2.754358 | -0.508171 |
| 1                | 3.845816                | -3.330922 | -0.448155 |
| 6                | 4.733792                | -1.368603 | -0.288398 |
| 6                | 3.553583                | -0.518673 | 2.548231  |
| 6                | -2.609238               | -0.213231 | 2.434563  |
| 6                | -3.241609               | -1.054040 | -2.475065 |
| 6                | 2.408228                | -0.561822 | -2.353987 |
| 6                | -1.324367               | 0.456915  | 2.943986  |
| 1                | -0.457013               | -0.194127 | 2.773886  |
| 1                | -1.407403               | 0.656323  | 4.023355  |
| 1                | -1.139355               | 1.409571  | 2.426598  |
| 7                | 2.995668                | -0.313554 | 1.199735  |
| 6                | -2.306668               | 2.508658  | -0.946178 |
| 1                | -3.213655               | 1.975520  | -1.248269 |
| 7                | -2.444133               | -0.456186 | 0.986151  |
| 6                | -2.314894               | 3.931081  | -1.028298 |
| 1                | -3.208403               | 4.450219  | -1.388622 |
| 6                | 1.610829                | 0.670622  | -2.825726 |
| 1                | 0.586661                | 0.661718  | -2.430616 |
| 1                | 1.551076                | 0.683980  | -3.925300 |
| 1                | 2.089385                | 1.599637  | -2.483234 |
| 6                | -1.215994               | 1.760562  | -0.503497 |
| 6                | -1.183481               | 4.624083  | -0.648827 |
| 6                | -4.717654               | -1.362680 | 0.341832  |
| 6                | -0.851784               | 6.104666  | -0.612929 |
| 6                | 0.572850                | -2.441757 | 0.934818  |
| 1                | 1.594713                | -2.739188 | 0.677927  |
| 1                | 0.367104                | -2.421068 | 2.010406  |
| 6                | -5.863730               | -0.557203 | 0.266767  |
| 1                | -5.758270               | 0.501437  | 0.020877  |

|   |           |           |           |
|---|-----------|-----------|-----------|
| 6 | -4.853512 | -2.723708 | 0.654525  |
| 1 | -3.962291 | -3.352076 | 0.712017  |
| 6 | -3.364665 | -0.793827 | 0.068188  |
| 6 | -6.118580 | -3.270840 | 0.885995  |
| 1 | -6.214111 | -4.332912 | 1.124672  |
| 6 | -7.126659 | -1.103231 | 0.506465  |
| 1 | -8.012780 | -0.466240 | 0.450175  |
| 6 | -7.256669 | -2.461587 | 0.814766  |
| 1 | -8.245340 | -2.889128 | 0.999418  |
| 6 | 7.161700  | -2.640665 | -0.883065 |
| 1 | 8.107969  | -3.135448 | -1.115775 |
| 6 | 7.127022  | -1.258370 | -0.672270 |
| 1 | 8.044961  | -0.669847 | -0.744793 |
| 6 | -2.195921 | -0.492039 | -3.455564 |
| 1 | -2.146444 | 0.605123  | -3.386588 |
| 1 | -2.452532 | -0.769025 | -4.489388 |
| 1 | -1.196258 | -0.892735 | -3.232934 |
| 6 | 2.512029  | 0.043944  | 3.532058  |
| 1 | 2.289288  | 1.097617  | 3.305463  |
| 1 | 2.886352  | -0.021868 | 4.565045  |
| 1 | 1.573058  | -0.524505 | 3.471941  |
| 6 | 4.871391  | 0.259433  | 2.731968  |
| 1 | 5.679374  | -0.161175 | 2.119574  |
| 1 | 5.191801  | 0.212248  | 3.784877  |
| 1 | 4.739970  | 1.318557  | 2.462387  |
| 6 | 1.708051  | -1.847403 | -2.826979 |
| 1 | 2.268179  | -2.736972 | -2.499059 |
| 1 | 1.630629  | -1.869147 | -3.925793 |
| 1 | 0.697859  | -1.901983 | -2.399701 |
| 6 | 3.809097  | -0.473419 | -2.986019 |
| 1 | 4.368341  | 0.390101  | -2.596547 |
| 1 | 3.694409  | -0.340897 | -4.072722 |
| 1 | 4.409684  | -1.376806 | -2.824614 |
| 6 | -3.251584 | -2.591965 | -2.565099 |
| 1 | -2.272619 | -2.997766 | -2.271611 |
| 1 | -3.472358 | -2.915799 | -3.594984 |
| 1 | -4.017425 | -3.022781 | -1.904109 |
| 6 | -4.623816 | -0.492059 | -2.857957 |
| 1 | -5.428383 | -0.933144 | -2.255666 |
| 1 | -4.836139 | -0.715948 | -3.915328 |
| 1 | -4.648154 | 0.601057  | -2.728350 |
| 6 | 3.781264  | -2.011354 | 2.856294  |
| 1 | 2.851652  | -2.581597 | 2.714623  |
| 1 | 4.108314  | -2.136860 | 3.900932  |
| 1 | 4.556069  | -2.443811 | 2.207767  |
| 6 | -3.787789 | 0.743818  | 2.701190  |
| 1 | -3.808314 | 1.025523  | 3.765776  |
| 1 | -4.755522 | 0.283912  | 2.462310  |
| 1 | -3.673543 | 1.660144  | 2.101526  |
| 6 | -2.807881 | -1.542047 | 3.189391  |
| 1 | -1.983987 | -2.235989 | 2.962317  |
| 1 | -3.755788 | -2.025247 | 2.915933  |
| 1 | -2.822542 | -1.363816 | 4.276550  |
| 6 | 2.184175  | 4.146578  | 0.609488  |
| 1 | 3.051374  | 4.749694  | 0.895766  |
| 6 | 1.019334  | 4.730328  | 0.156536  |
| 6 | 0.613170  | 6.176325  | -0.061335 |
| 1 | 1.291332  | 6.682073  | -0.769050 |
| 1 | 0.664811  | 6.751025  | 0.878877  |
| 1 | -1.557068 | 6.658845  | 0.028995  |

1 -0.929771 6.555267 -1.616826

Table S14

B3LYP-D3/def2-SVP

TS-Ge (with C<sub>2</sub>H<sub>4</sub>)

1<sup>st</sup> frequency = -184.3 cm<sup>-1</sup>

G = -6082.110512 Hartree

| Atomic<br>Number | Coordinates (Angstroms) |           |           |
|------------------|-------------------------|-----------|-----------|
|                  | X                       | Y         | Z         |
| 32               | 1.382546                | -0.441533 | 0.995004  |
| 32               | -1.481600               | -0.238767 | 0.579182  |
| 6                | 0.182387                | 2.064877  | -0.222772 |
| 6                | -0.991062               | -0.025295 | 3.051789  |
| 1                | -1.401653               | 0.985698  | 3.025337  |
| 1                | -1.708735               | -0.811470 | 3.298022  |
| 6                | 1.292497                | 1.548197  | 0.537223  |
| 6                | 2.392050                | 2.381154  | 0.730577  |
| 1                | 3.251109                | 1.989114  | 1.280869  |
| 6                | 0.344378                | 3.351415  | -0.802215 |
| 7                | 2.664297                | -0.758710 | -0.711428 |
| 7                | -2.837166               | -1.252594 | -0.598196 |
| 6                | 3.750752                | -0.797653 | 0.038230  |
| 6                | 5.967164                | -0.033372 | -0.861936 |
| 1                | 5.631892                | 0.994432  | -0.707805 |
| 6                | 6.801399                | -2.670758 | -1.255785 |
| 1                | 7.124073                | -3.703777 | -1.408277 |
| 6                | 5.542071                | -2.410168 | -0.705830 |
| 1                | 4.881242                | -3.236185 | -0.434446 |
| 6                | 5.117413                | -1.090675 | -0.503782 |
| 6                | 4.375811                | -0.700178 | 2.489486  |
| 6                | -4.309463               | 1.291391  | 1.553919  |
| 6                | -2.738440               | -2.616063 | -1.164108 |
| 6                | 2.485051                | -0.950772 | -2.160941 |
| 6                | -3.427370               | 2.547322  | 1.708199  |
| 1                | -2.461345               | 2.315537  | 2.174302  |
| 1                | -3.940151               | 3.287566  | 2.341668  |
| 1                | -3.216747               | 3.004072  | 0.732051  |
| 7                | 3.482960                | -0.526188 | 1.324277  |
| 6                | -1.962582               | 1.989002  | -1.377122 |
| 1                | -2.900793               | 1.468641  | -1.595042 |
| 7                | -3.523898               | 0.269566  | 0.832682  |
| 6                | -1.746013               | 3.254837  | -1.989613 |
| 1                | -2.492339               | 3.665112  | -2.676494 |
| 6                | 1.203341                | -0.195345 | -2.552371 |
| 1                | 0.353445                | -0.495241 | -1.930237 |
| 1                | 0.942812                | -0.397735 | -3.602963 |
| 1                | 1.335726                | 0.888022  | -2.425532 |
| 6                | -1.061489               | 1.400990  | -0.496401 |
| 6                | -0.596090               | 3.949883  | -1.673135 |
| 6                | -5.319602               | -1.068048 | -0.280567 |
| 6                | -0.073564               | 5.306175  | -2.109017 |
| 6                | 0.365110                | -0.205227 | 3.288447  |
| 1                | 0.721226                | -1.146376 | 3.712805  |
| 1                | 0.998708                | 0.670076  | 3.442968  |

|   |           |           |           |
|---|-----------|-----------|-----------|
| 6 | -5.944259 | -0.657579 | -1.467335 |
| 1 | -5.376827 | -0.074138 | -2.195379 |
| 6 | -6.043725 | -1.821028 | 0.653812  |
| 1 | -5.559364 | -2.142560 | 1.578171  |
| 6 | -3.902184 | -0.677645 | -0.008924 |
| 6 | -7.376989 | -2.159763 | 0.404434  |
| 1 | -7.933067 | -2.750981 | 1.136249  |
| 6 | -7.278208 | -0.986230 | -1.710847 |
| 1 | -7.759596 | -0.655554 | -2.634501 |
| 6 | -7.997701 | -1.739245 | -0.775681 |
| 1 | -9.041804 | -1.998649 | -0.967782 |
| 6 | 7.642245  | -1.612951 | -1.613282 |
| 1 | 8.624780  | -1.815958 | -2.046754 |
| 6 | 7.221318  | -0.292504 | -1.414711 |
| 1 | 7.874191  | 0.538123  | -1.694537 |
| 6 | -1.312795 | -2.752113 | -1.717849 |
| 1 | -1.140752 | -2.030963 | -2.529408 |
| 1 | -1.145740 | -3.765428 | -2.113939 |
| 1 | -0.568918 | -2.567352 | -0.928670 |
| 6 | 3.667161  | -0.106130 | 3.718121  |
| 1 | 3.388600  | 0.943957  | 3.542136  |
| 1 | 4.334826  | -0.143499 | 4.592189  |
| 1 | 2.762593  | -0.670487 | 3.967701  |
| 6 | 5.722371  | 0.044584  | 2.342379  |
| 1 | 6.394022  | -0.431176 | 1.619303  |
| 1 | 6.242131  | 0.057932  | 3.313298  |
| 1 | 5.557693  | 1.087231  | 2.029241  |
| 6 | 2.315297  | -2.455481 | -2.454073 |
| 1 | 3.241584  | -3.002357 | -2.222964 |
| 1 | 2.076740  | -2.623585 | -3.517101 |
| 1 | 1.503676  | -2.878802 | -1.846127 |
| 6 | 3.624792  | -0.386067 | -3.035867 |
| 1 | 3.863873  | 0.647496  | -2.744663 |
| 1 | 3.292747  | -0.375832 | -4.086176 |
| 1 | 4.542653  | -0.984110 | -2.986742 |
| 6 | -2.950888 | -3.668552 | -0.056888 |
| 1 | -2.235073 | -3.509079 | 0.764820  |
| 1 | -2.803343 | -4.686995 | -0.451351 |
| 1 | -3.970142 | -3.610203 | 0.352436  |
| 6 | -3.725369 | -2.864943 | -2.322152 |
| 1 | -4.761756 | -2.971043 | -1.979113 |
| 1 | -3.451153 | -3.797017 | -2.841405 |
| 1 | -3.681761 | -2.040667 | -3.050154 |
| 6 | 4.637173  | -2.197386 | 2.754029  |
| 1 | 3.683241  | -2.736840 | 2.862506  |
| 1 | 5.221011  | -2.335156 | 3.679020  |
| 1 | 5.202827  | -2.653579 | 1.929450  |
| 6 | -5.592640 | 1.729703  | 0.818191  |
| 1 | -6.000796 | 2.624884  | 1.312866  |
| 1 | -6.375325 | 0.961634  | 0.827099  |
| 1 | -5.372334 | 1.990523  | -0.227867 |
| 6 | -4.676558 | 0.746844  | 2.948954  |
| 1 | -3.773607 | 0.463679  | 3.508854  |
| 1 | -5.322717 | -0.139193 | 2.861334  |
| 1 | -5.218933 | 1.508132  | 3.532488  |
| 6 | 2.494107  | 3.700780  | 0.201531  |
| 1 | 3.389454  | 4.297243  | 0.402155  |
| 6 | 1.472243  | 4.178307  | -0.590161 |
| 6 | 1.278382  | 5.483457  | -1.339196 |
| 1 | 2.118240  | 5.689923  | -2.023108 |

|   |           |          |           |
|---|-----------|----------|-----------|
| 1 | 1.233076  | 6.335498 | -0.639655 |
| 1 | -0.789779 | 6.111339 | -1.875450 |
| 1 | 0.077605  | 5.334711 | -3.201544 |

**Table S15**

**B3LYP-D3/def2-SVP**

TS-C (with Ph<sub>2</sub>CO)

1<sup>st</sup> frequency = -795.8 cm<sup>-1</sup>

G = -2502.039222 Hartree

| Atomic<br>Number | Coordinates (Angstroms) |           |           |
|------------------|-------------------------|-----------|-----------|
|                  | X                       | Y         | Z         |
| 6                | 0.297809                | 0.133402  | -0.176731 |
| 6                | -0.849118               | -1.129531 | -0.288004 |
| 8                | 0.062167                | -1.938986 | -1.719464 |
| 7                | -2.526493               | -0.000771 | 1.309435  |
| 6                | -0.519237               | -1.923452 | 0.891560  |
| 6                | 1.337700                | -0.424947 | 0.665861  |
| 7                | -2.237063               | -1.080458 | -0.703893 |
| 7                | 0.307619                | 1.419518  | -0.540204 |
| 6                | 0.750284                | -1.525349 | 1.335996  |
| 7                | 2.390892                | 2.490392  | -0.602360 |
| 6                | 1.337994                | -1.645833 | -1.885151 |
| 6                | 2.336090                | -2.485600 | -1.249851 |
| 6                | 3.733811                | -2.226082 | -1.310406 |
| 1                | 4.105888                | -1.397300 | -1.911751 |
| 6                | 1.659352                | -0.746138 | -3.024598 |
| 6                | 1.417721                | -2.217051 | 2.338844  |
| 6                | -3.066395               | -0.377878 | 0.215053  |
| 6                | 2.743027                | -1.921105 | 2.691258  |
| 6                | 2.704816                | -0.161798 | 0.981677  |
| 1                | 3.268884                | 0.586241  | 0.440936  |
| 6                | -1.135690               | -2.988108 | 1.575764  |
| 1                | -2.151812               | -3.287923 | 1.325898  |
| 6                | 3.381031                | -0.905453 | 1.977383  |
| 1                | 4.436744                | -0.679787 | 2.151105  |
| 6                | 2.570529                | 0.322666  | -2.962690 |
| 1                | 3.064019                | 0.549558  | -2.022030 |
| 6                | 0.849769                | -3.330140 | 2.976313  |
| 6                | 1.357252                | 2.292830  | 0.082282  |
| 6                | -4.449995               | 0.011447  | -0.228154 |
| 6                | -0.633914               | 2.168617  | -1.484743 |
| 6                | -0.445904               | -3.688301 | 2.603349  |
| 1                | -0.953414               | -4.528729 | 3.086678  |
| 6                | -5.587232               | -0.407513 | 0.479129  |
| 1                | -5.470328               | -1.078139 | 1.331105  |
| 6                | 4.646800                | -3.023566 | -0.623732 |
| 1                | 5.713034                | -2.785729 | -0.682262 |
| 6                | 2.120297                | 0.918961  | -5.274248 |
| 1                | 2.295951                | 1.566063  | -6.137523 |
| 6                | 1.008753                | 2.913301  | 1.409225  |
| 6                | 1.224191                | -0.154302 | -5.361784 |
| 1                | 0.701639                | -0.356882 | -6.300911 |
| 6                | 2.791574                | 1.147151  | -4.069666 |
| 1                | 3.485565                | 1.987954  | -3.985657 |
| 6                | -3.040820               | 0.726843  | 2.472228  |



|   |           |           |           |
|---|-----------|-----------|-----------|
| 6 | -4.621512 | 0.847927  | -1.340268 |
| 1 | -3.753681 | 1.163647  | -1.914213 |
| 6 | -1.792982 | 2.747653  | -0.660546 |
| 1 | -2.308620 | 1.960810  | -0.107278 |
| 1 | -2.512952 | 3.240138  | -1.330553 |
| 1 | -1.446442 | 3.490052  | 0.067087  |
| 6 | 1.000849  | -0.972016 | -4.255382 |
| 1 | 0.309711  | -1.813014 | -4.330349 |
| 6 | 1.256870  | 2.268811  | 2.631236  |
| 1 | 1.642805  | 1.252309  | 2.640121  |
| 6 | -1.810879 | 1.419207  | 3.081290  |
| 1 | -0.999308 | 0.692572  | 3.220875  |
| 1 | -2.047672 | 1.881724  | 4.052322  |
| 1 | -1.447082 | 2.208431  | 2.410659  |
| 6 | 4.216733  | -4.114105 | 0.141212  |
| 1 | 4.937651  | -4.732475 | 0.682195  |
| 6 | 3.572594  | 3.320057  | -0.309785 |
| 6 | 2.847543  | -4.418078 | 0.174662  |
| 1 | 2.490896  | -5.279965 | 0.745629  |
| 6 | 0.111064  | 3.312249  | -2.198761 |
| 1 | 0.432284  | 4.116284  | -1.525720 |
| 1 | -0.590461 | 3.752887  | -2.922423 |
| 1 | 0.987733  | 2.936409  | -2.740346 |
| 6 | -1.136397 | 1.226487  | -2.571103 |
| 1 | -0.311797 | 0.872639  | -3.196156 |
| 1 | -1.843180 | 1.771820  | -3.214468 |
| 1 | -1.651699 | 0.367985  | -2.146733 |
| 6 | 1.928394  | -3.624695 | -0.498493 |
| 1 | 0.868282  | -3.866094 | -0.446726 |
| 6 | -2.792779 | -2.179778 | -1.663374 |
| 6 | 1.909718  | -3.889884 | 3.917008  |
| 6 | 3.149916  | -2.918377 | 3.765512  |
| 6 | -7.023592 | 0.838814  | -1.019736 |
| 1 | -8.022478 | 1.157189  | -1.328235 |
| 6 | -5.897659 | 1.265157  | -1.729026 |
| 1 | -6.011184 | 1.920015  | -2.596767 |
| 6 | -2.130501 | -3.562264 | -1.436485 |
| 1 | -1.043606 | -3.517946 | -1.401453 |
| 1 | -2.416048 | -4.210203 | -2.279314 |
| 1 | -2.507159 | -4.036445 | -0.521349 |
| 6 | -6.862690 | -0.005568 | 0.085035  |
| 1 | -7.736893 | -0.353983 | 0.640757  |
| 6 | 3.325703  | 4.689806  | -0.972057 |
| 1 | 3.064677  | 4.570159  | -2.033968 |
| 1 | 4.235566  | 5.305895  | -0.902602 |
| 1 | 2.509427  | 5.228616  | -0.468955 |
| 6 | 1.038334  | 2.936316  | 3.838191  |
| 1 | 1.242126  | 2.418063  | 4.778181  |
| 6 | 3.943935  | 3.509469  | 1.175234  |
| 1 | 3.240754  | 4.155933  | 1.713261  |
| 1 | 4.939492  | 3.976109  | 1.233490  |
| 1 | 3.990032  | 2.543322  | 1.698075  |
| 6 | 4.750152  | 2.622996  | -1.022465 |
| 1 | 4.936677  | 1.625498  | -0.595511 |
| 1 | 5.670995  | 3.216142  | -0.913938 |
| 1 | 4.538178  | 2.498554  | -2.092740 |
| 6 | 0.534511  | 4.236916  | 1.429943  |
| 1 | 0.358282  | 4.766538  | 0.493000  |
| 6 | -4.117101 | 1.812831  | 2.239106  |
| 1 | -3.831110 | 2.484206  | 1.416571  |

|   |           |           |           |
|---|-----------|-----------|-----------|
| 1 | -4.209797 | 2.422313  | 3.151877  |
| 1 | -5.107906 | 1.405958  | 2.011437  |
| 6 | 0.301032  | 4.896052  | 2.638142  |
| 1 | -0.071658 | 5.923248  | 2.630523  |
| 6 | -2.601703 | -1.724946 | -3.118508 |
| 1 | -3.173531 | -0.806884 | -3.317716 |
| 1 | -2.975997 | -2.503568 | -3.801459 |
| 1 | -1.546471 | -1.546298 | -3.336441 |
| 6 | 0.556745  | 4.246817  | 3.849865  |
| 1 | 0.382640  | 4.762493  | 4.797440  |
| 6 | -3.549215 | -0.327031 | 3.478850  |
| 1 | -4.446857 | -0.840438 | 3.104993  |
| 1 | -3.806050 | 0.151891  | 4.437425  |
| 1 | -2.771813 | -1.085236 | 3.657543  |
| 6 | -4.295720 | -2.478435 | -1.468850 |
| 1 | -4.543415 | -2.703852 | -0.422907 |
| 1 | -4.508541 | -3.385598 | -2.053626 |
| 1 | -4.966088 | -1.697739 | -1.837741 |
| 1 | 4.062124  | -3.467308 | 3.483229  |
| 1 | 3.373380  | -2.409061 | 4.719474  |
| 1 | 1.561897  | -3.940918 | 4.962566  |
| 1 | 2.184550  | -4.919757 | 3.630548  |

---

**Table S16****B3LYP-D3/def2-SVP**TS-Si (with Ph<sub>2</sub>CO)1<sup>st</sup> frequency = -86.6 cm<sup>-1</sup>

G = -3004.958877 Hartree

| Atomic<br>Number | Coordinates (Angstroms) |           |           |
|------------------|-------------------------|-----------|-----------|
|                  | X                       | Y         | Z         |
| 14               | 0.758307                | 0.025218  | -0.382584 |
| 14               | -1.507351               | -0.673749 | 0.085712  |
| 8                | -0.314639               | -2.238434 | -2.361935 |
| 7                | -2.745262               | 0.338819  | 1.055626  |
| 6                | -1.079941               | -2.173345 | 1.093771  |
| 6                | 1.119707                | -0.892909 | 1.300345  |
| 7                | -3.158505               | -0.731407 | -0.772466 |
| 7                | 0.893974                | 1.866902  | -0.080504 |
| 6                | 0.237403                | -1.990466 | 1.634551  |
| 7                | 3.139795                | 1.378329  | -0.198059 |
| 6                | 0.869357                | -1.845315 | -2.428381 |
| 6                | 1.941173                | -2.661275 | -1.750976 |
| 6                | 3.308933                | -2.591879 | -2.071759 |
| 1                | 3.653938                | -1.909820 | -2.848293 |
| 6                | 1.242320                | -0.891943 | -3.547543 |
| 6                | 0.666186                | -2.943723 | 2.582839  |
| 6                | -3.686412               | 0.110275  | 0.133290  |
| 6                | 1.890009                | -2.859005 | 3.281027  |
| 6                | 2.296761                | -0.811162 | 2.051433  |
| 1                | 2.981052                | 0.010492  | 1.858005  |
| 6                | -1.825288               | -3.292052 | 1.454739  |
| 1                | -2.828523               | -3.423937 | 1.039150  |
| 6                | 2.691531                | -1.763249 | 3.035763  |
| 1                | 3.641549                | -1.621658 | 3.559897  |
| 6                | 2.245459                | 0.091935  | -3.463075 |
| 1                | 2.764586                | 0.250464  | -2.515628 |
| 6                | -0.087826               | -4.084459 | 2.935625  |
| 6                | 2.233385                | 2.179381  | 0.229358  |
| 6                | -5.015986               | 0.776422  | 0.086592  |
| 6                | 0.118296                | 2.910904  | -0.843700 |
| 6                | -1.330855               | -4.274298 | 2.358479  |
| 1                | -1.944609               | -5.146297 | 2.601173  |
| 6                | -6.125846               | 0.230819  | 0.742628  |
| 1                | -6.029780               | -0.719806 | 1.271418  |
| 6                | 4.239053                | -3.400543 | -1.413802 |
| 1                | 5.298244                | -3.322483 | -1.673566 |
| 6                | 1.806242                | 0.784377  | -5.748421 |
| 1                | 2.022626                | 1.438332  | -6.597479 |
| 6                | 2.446057                | 3.343822  | 1.160605  |
| 6                | 0.802647                | -0.182745 | -5.839913 |
| 1                | 0.230825                | -0.293421 | -6.765586 |
| 6                | 2.525590                | 0.916794  | -4.552677 |
| 1                | 3.299388                | 1.684258  | -4.460484 |
| 6                | -2.788450               | 1.000965  | 2.375768  |
| 6                | -5.138047               | 1.990118  | -0.605825 |
| 1                | -4.266930               | 2.410644  | -1.112783 |
| 6                | -0.366173               | 4.055628  | 0.073126  |
| 1                | -0.889922               | 3.648708  | 0.949449  |
| 1                | -1.064622               | 4.706652  | -0.477884 |

|   |           |           |           |
|---|-----------|-----------|-----------|
| 1 | 0.454000  | 4.684469  | 0.437116  |
| 6 | 0.524401  | -1.013159 | -4.749068 |
| 1 | -0.258704 | -1.771201 | -4.810294 |
| 6 | 1.974069  | 3.205401  | 2.475428  |
| 1 | 1.467496  | 2.281020  | 2.759880  |
| 6 | -1.329810 | 1.153254  | 2.838273  |
| 1 | -0.852456 | 0.174090  | 2.982205  |
| 1 | -1.296131 | 1.692556  | 3.796743  |
| 1 | -0.734323 | 1.706925  | 2.098748  |
| 6 | 3.823606  | -4.302066 | -0.429606 |
| 1 | 4.555130  | -4.924327 | 0.092791  |
| 6 | 4.593753  | 1.375259  | 0.027327  |
| 6 | 2.459607  | -4.411378 | -0.133089 |
| 1 | 2.115434  | -5.121747 | 0.623257  |
| 6 | 0.980086  | 3.475341  | -1.992413 |
| 1 | 1.878638  | 3.983861  | -1.617903 |
| 1 | 0.407447  | 4.209426  | -2.581777 |
| 1 | 1.303134  | 2.664925  | -2.661753 |
| 6 | -1.131370 | 2.283706  | -1.484118 |
| 1 | -0.879636 | 1.438406  | -2.140685 |
| 1 | -1.640181 | 3.041179  | -2.100315 |
| 1 | -1.840322 | 1.947784  | -0.716800 |
| 6 | 1.530739  | -3.615106 | -0.798036 |
| 1 | 0.467020  | -3.708039 | -0.583946 |
| 6 | -3.666461 | -1.280521 | -2.057862 |
| 6 | 0.705527  | -4.892658 | 3.947206  |
| 6 | 2.016809  | -4.066129 | 4.191690  |
| 6 | -7.474930 | 2.108228  | 0.018735  |
| 1 | -8.435548 | 2.628395  | -0.007082 |
| 6 | -6.365961 | 2.653042  | -0.638386 |
| 1 | -6.457774 | 3.598744  | -1.177811 |
| 6 | -3.344252 | -2.786601 | -2.053580 |
| 1 | -2.269967 | -2.963070 | -1.923004 |
| 1 | -3.644464 | -3.232969 | -3.014445 |
| 1 | -3.903931 | -3.292525 | -1.250404 |
| 6 | -7.353635 | 0.897258  | 0.707374  |
| 1 | -8.218691 | 0.467760  | 1.218205  |
| 6 | 5.234962  | 2.278094  | -1.048017 |
| 1 | 4.881060  | 1.989843  | -2.050019 |
| 1 | 6.332169  | 2.179886  | -1.026188 |
| 1 | 4.984930  | 3.335611  | -0.884688 |
| 6 | 2.162769  | 4.226829  | 3.407824  |
| 1 | 1.802534  | 4.100484  | 4.432194  |
| 6 | 5.079682  | 1.805510  | 1.429301  |
| 1 | 4.942918  | 2.876407  | 1.620331  |
| 1 | 6.154316  | 1.583342  | 1.523178  |
| 1 | 4.553757  | 1.252343  | 2.221482  |
| 6 | 5.053585  | -0.074068 | -0.230279 |
| 1 | 4.586458  | -0.776370 | 0.473753  |
| 1 | 6.148130  | -0.160123 | -0.138219 |
| 1 | 4.761691  | -0.391138 | -1.239700 |
| 6 | 3.095091  | 4.530086  | 0.792518  |
| 1 | 3.458862  | 4.656646  | -0.228075 |
| 6 | -3.445778 | 2.391493  | 2.308818  |
| 1 | -2.978371 | 3.008458  | 1.527463  |
| 1 | -3.312302 | 2.903091  | 3.274298  |
| 1 | -4.523205 | 2.335182  | 2.107385  |
| 6 | 3.267014  | 5.561651  | 1.720021  |
| 1 | 3.765431  | 6.485947  | 1.416639  |
| 6 | -2.933394 | -0.565472 | -3.206059 |

|   |           |           |           |
|---|-----------|-----------|-----------|
| 1 | -3.148974 | 0.514731  | -3.187030 |
| 1 | -3.266034 | -0.966980 | -4.176249 |
| 1 | -1.850793 | -0.729204 | -3.124636 |
| 6 | 2.805576  | 5.411639  | 3.031478  |
| 1 | 2.945430  | 6.216207  | 3.757957  |
| 6 | -3.546892 | 0.095242  | 3.364441  |
| 1 | -4.604837 | -0.003442 | 3.079083  |
| 1 | -3.508505 | 0.521336  | 4.379448  |
| 1 | -3.093458 | -0.907489 | 3.388436  |
| 6 | -5.184097 | -1.111564 | -2.227739 |
| 1 | -5.741475 | -1.548637 | -1.386721 |
| 1 | -5.482889 | -1.644578 | -3.142684 |
| 1 | -5.488845 | -0.063366 | -2.339438 |
| 1 | 2.916908  | -4.655904 | 3.950627  |
| 1 | 2.116110  | -3.767505 | 5.248901  |
| 1 | 0.134162  | -5.042476 | 4.878419  |
| 1 | 0.928670  | -5.900000 | 3.557159  |

---

**Table S17****B3LYP-D3/def2-SVP**TS-Ge (with Ph<sub>2</sub>CO)1<sup>st</sup> frequency = -83.9 cm<sup>-1</sup>

G = -6579.720784 Hartree

| Atomic<br>Number | Coordinates (Angstroms) |           |           |
|------------------|-------------------------|-----------|-----------|
|                  | X                       | Y         | Z         |
| 32               | 1.230658                | 0.116682  | 0.054928  |
| 32               | -1.580535               | -0.259621 | 0.262082  |
| 8                | -0.731549               | -1.218402 | 2.194418  |
| 7                | -3.051741               | -0.175165 | -1.243778 |
| 6                | -1.607366               | 1.748709  | 0.510360  |
| 6                | 0.695475                | 1.928261  | -0.626184 |
| 7                | -3.489729               | -0.696459 | 0.841595  |
| 7                | 2.283467                | -0.713404 | -1.465641 |
| 6                | -0.543175               | 2.472960  | -0.135084 |
| 7                | 3.292755                | 0.486061  | 0.068421  |
| 6                | 0.527451                | -1.254751 | 2.338616  |
| 6                | 1.125510                | -0.293219 | 3.323854  |
| 6                | 2.224987                | -0.605060 | 4.144283  |
| 1                | 2.715602                | -1.574317 | 4.056156  |
| 6                | 1.243671                | -2.486758 | 1.862368  |
| 6                | -0.759234               | 3.857008  | -0.361845 |
| 6                | -3.976654               | -0.621133 | -0.406905 |
| 6                | 0.123333                | 4.684228  | -1.094211 |
| 6                | 1.536269                | 2.750809  | -1.369461 |
| 1                | 2.473543                | 2.336159  | -1.751897 |
| 6                | -2.721487               | 2.460036  | 0.944057  |
| 1                | -3.549978               | 1.907108  | 1.394488  |
| 6                | 1.264691                | 4.123378  | -1.631087 |
| 1                | 1.968105                | 4.714232  | -2.225204 |
| 6                | 2.641971                | -2.583448 | 1.695852  |
| 1                | 3.271179                | -1.719123 | 1.899083  |
| 6                | -1.895317               | 4.562945  | 0.097724  |
| 6                | 3.462471                | -0.259000 | -1.016040 |
| 6                | -5.354997               | -1.035825 | -0.816468 |
| 6                | 1.974104                | -1.690461 | -2.530987 |
| 6                | -2.873572               | 3.866956  | 0.777005  |
| 1                | -3.774147               | 4.364085  | 1.150012  |
| 6                | -6.411550               | -0.115091 | -0.826136 |
| 1                | -6.221425               | 0.920869  | -0.537552 |
| 6                | 2.681024                | 0.302049  | 5.107873  |
| 1                | 3.538269                | 0.035572  | 5.732016  |
| 6                | 2.434586                | -4.851559 | 0.856870  |
| 1                | 2.896306                | -5.762675 | 0.468205  |
| 6                | 4.779966                | -0.542314 | -1.661222 |
| 6                | 1.048315                | -4.765882 | 1.003853  |
| 1                | 0.415449                | -5.613847 | 0.728587  |
| 6                | 3.226700                | -3.748889 | 1.205153  |
| 1                | 4.312276                | -3.797663 | 1.083026  |
| 6                | -3.076258               | 0.084697  | -2.689201 |
| 6                | -5.595235               | -2.365036 | -1.191175 |
| 1                | -4.772477               | -3.083664 | -1.179922 |
| 6                | 1.811719                | -0.941011 | -3.867948 |
| 1                | 1.064845                | -0.139037 | -3.772324 |
| 1                | 1.484171                | -1.629856 | -4.663363 |

|   |           |           |           |
|---|-----------|-----------|-----------|
| 1 | 2.764085  | -0.489170 | -4.181838 |
| 6 | 0.459950  | -3.598978 | 1.499438  |
| 1 | -0.621944 | -3.528177 | 1.605744  |
| 6 | 5.143007  | 0.135737  | -2.833704 |
| 1 | 4.461235  | 0.874681  | -3.259680 |
| 6 | -1.800089 | 0.885581  | -3.007501 |
| 1 | -1.814295 | 1.862102  | -2.504062 |
| 1 | -1.709510 | 1.049550  | -4.092258 |
| 1 | -0.900013 | 0.354541  | -2.668494 |
| 6 | 2.044181  | 1.531760  | 5.281380  |
| 1 | 2.406072  | 2.241327  | 6.029685  |
| 6 | 4.236686  | 1.321520  | 0.836593  |
| 6 | 0.928422  | 1.841574  | 4.490626  |
| 1 | 0.414212  | 2.797803  | 4.617343  |
| 6 | 3.029897  | -2.805503 | -2.673715 |
| 1 | 3.969357  | -2.450150 | -3.113920 |
| 1 | 2.632410  | -3.591745 | -3.334390 |
| 1 | 3.245523  | -3.259137 | -1.694902 |
| 6 | 0.643607  | -2.365048 | -2.155899 |
| 1 | 0.738620  | -2.920487 | -1.211747 |
| 1 | 0.339354  | -3.066604 | -2.947973 |
| 1 | -0.159794 | -1.629124 | -2.026396 |
| 6 | 0.471804  | 0.940526  | 3.533740  |
| 1 | -0.393331 | 1.190881  | 2.917954  |
| 6 | -4.078551 | -1.238236 | 2.087672  |
| 6 | -1.767475 | 6.019968  | -0.306903 |
| 6 | -0.444517 | 6.090473  | -1.142759 |
| 6 | -7.931878 | -1.849189 | -1.567309 |
| 1 | -8.936853 | -2.166018 | -1.857224 |
| 6 | -6.879816 | -2.770319 | -1.564840 |
| 1 | -7.059570 | -3.809255 | -1.852452 |
| 6 | -3.527962 | -0.409033 | 3.266171  |
| 1 | -2.432160 | -0.417794 | 3.279829  |
| 1 | -3.888530 | -0.830222 | 4.217919  |
| 1 | -3.877159 | 0.633059  | 3.203489  |
| 6 | -7.694342 | -0.520300 | -1.198553 |
| 1 | -8.513437 | 0.203190  | -1.200326 |
| 6 | 5.066764  | 0.459214  | 1.808254  |
| 1 | 4.409351  | -0.058132 | 2.521390  |
| 1 | 5.751817  | 1.095952  | 2.390429  |
| 1 | 5.671152  | -0.283835 | 1.270446  |
| 6 | 6.375055  | -0.117661 | -3.440901 |
| 1 | 6.652539  | 0.419630  | -4.351120 |
| 6 | 5.183113  | 2.135036  | -0.069362 |
| 1 | 5.926983  | 1.504182  | -0.572689 |
| 1 | 5.728445  | 2.872002  | 0.540733  |
| 1 | 4.613797  | 2.683660  | -0.834627 |
| 6 | 3.388480  | 2.304705  | 1.663426  |
| 1 | 2.820545  | 2.983743  | 1.012925  |
| 1 | 4.037726  | 2.906361  | 2.317447  |
| 1 | 2.677775  | 1.765762  | 2.303227  |
| 6 | 5.662143  | -1.479174 | -1.105884 |
| 1 | 5.367445  | -2.025452 | -0.208845 |
| 6 | -3.058286 | -1.241199 | -3.476330 |
| 1 | -2.188460 | -1.849588 | -3.186465 |
| 1 | -2.999111 | -1.048287 | -4.559901 |
| 1 | -3.970204 | -1.825083 | -3.285007 |
| 6 | 6.891297  | -1.736602 | -1.716824 |
| 1 | 7.569384  | -2.475084 | -1.281963 |
| 6 | -3.649407 | -2.710790 | 2.240204  |

|   |           |           |           |
|---|-----------|-----------|-----------|
| 1 | -4.018103 | -3.307571 | 1.390413  |
| 1 | -4.058795 | -3.143244 | 3.167523  |
| 1 | -2.554031 | -2.777105 | 2.278409  |
| 6 | 7.251337  | -1.055404 | -2.884437 |
| 1 | 8.214109  | -1.255927 | -3.361043 |
| 6 | -4.285856 | 0.938600  | -3.120693 |
| 1 | -5.228320 | 0.378494  | -3.078987 |
| 1 | -4.146241 | 1.279083  | -4.159094 |
| 1 | -4.374362 | 1.826623  | -2.475934 |
| 6 | -5.616407 | -1.147465 | 2.148942  |
| 1 | -5.965025 | -0.125854 | 1.937926  |
| 1 | -5.938467 | -1.410647 | 3.168284  |
| 1 | -6.118406 | -1.834457 | 1.457215  |
| 1 | 0.264122  | 6.827377  | -0.729680 |
| 1 | -0.639802 | 6.399846  | -2.183491 |
| 1 | -2.640811 | 6.358026  | -0.888904 |
| 1 | -1.717177 | 6.672148  | 0.581439  |

---



**Table S18****B3LYP-D3/def2-SVP**Prod-C (with C<sub>2</sub>H<sub>4</sub>)1<sup>st</sup> frequency = 19.3 cm<sup>-1</sup>

G = -2004.577252 Hartree

| Atomic<br>Number | Coordinates (Angstroms) |           |           |
|------------------|-------------------------|-----------|-----------|
|                  | X                       | Y         | Z         |
| 6                | 1.022278                | 0.418776  | -0.098725 |
| 6                | -0.707233               | 0.900605  | 0.110012  |
| 6                | 0.800858                | 2.774705  | -0.083127 |
| 6                | -0.587407               | 0.217975  | 1.489842  |
| 1                | -1.087053               | 0.744333  | 2.311649  |
| 1                | -0.971283               | -0.811486 | 1.461279  |
| 6                | 1.713137                | 1.747069  | -0.390078 |
| 6                | 3.022207                | 2.124118  | -0.661127 |
| 1                | 3.770474                | 1.354051  | -0.846316 |
| 6                | 1.206155                | 4.102153  | -0.013769 |
| 7                | 1.478302                | -0.829262 | -0.732614 |
| 7                | -1.871123               | 0.476079  | -0.680202 |
| 6                | 2.528119                | -1.501816 | -0.020524 |
| 6                | 3.208475                | -3.958349 | -0.074072 |
| 1                | 4.152047                | -3.674043 | -0.541623 |
| 6                | 0.774624                | -4.698110 | 1.072658  |
| 1                | -0.180338               | -4.976430 | 1.525754  |
| 6                | 1.043911                | -3.354643 | 0.798441  |
| 1                | 0.303920                | -2.592274 | 1.034958  |
| 6                | 2.266197                | -2.963787 | 0.232753  |
| 6                | 4.557604                | -1.099674 | 1.385154  |
| 6                | -4.302837               | 0.269145  | 2.178026  |
| 6                | -2.389781               | 1.207869  | -1.908895 |
| 6                | 1.418619                | -1.068171 | -2.224237 |
| 6                | -3.833864               | 1.145033  | 3.362612  |
| 1                | -2.830093               | 0.841601  | 3.696818  |
| 1                | -4.521157               | 1.049503  | 4.218321  |
| 1                | -3.785516               | 2.201963  | 3.062042  |
| 7                | 3.506924                | -0.810183 | 0.407282  |
| 6                | -1.350502               | 3.392754  | 0.759853  |
| 1                | -2.354615               | 3.118384  | 1.088194  |
| 7                | -3.393148               | 0.604695  | 1.076042  |
| 6                | -0.925834               | 4.761871  | 0.836433  |
| 1                | -1.627359               | 5.505004  | 1.226638  |
| 6                | 1.848061                | 0.186245  | -3.012763 |
| 1                | 1.291785                | 1.082156  | -2.732981 |
| 1                | 1.695978                | 0.012415  | -4.089746 |
| 1                | 2.913195                | 0.398620  | -2.846144 |
| 6                | -0.507246               | 2.402859  | 0.271677  |
| 6                | 0.351072                | 5.125581  | 0.431416  |
| 6                | -3.325916               | -1.498363 | -0.265326 |
| 6                | 1.149378                | 6.422475  | 0.396617  |
| 6                | 0.932574                | 0.223462  | 1.463998  |
| 1                | 1.399454                | -0.681647 | 1.862411  |
| 1                | 1.375755                | 1.076300  | 1.993811  |
| 6                | -4.654354               | -1.865890 | -0.532013 |
| 1                | -5.438538               | -1.108464 | -0.499516 |
| 6                | -2.330964               | -2.481435 | -0.357803 |
| 1                | -1.293229               | -2.198242 | -0.203282 |

|   |           |           |           |
|---|-----------|-----------|-----------|
| 6 | -2.936517 | -0.096272 | 0.116538  |
| 6 | -2.652734 | -3.805343 | -0.663359 |
| 1 | -1.857375 | -4.553525 | -0.714172 |
| 6 | -4.979712 | -3.182565 | -0.863088 |
| 1 | -6.017941 | -3.446197 | -1.080517 |
| 6 | -3.980647 | -4.161034 | -0.918337 |
| 1 | -4.236255 | -5.193234 | -1.171153 |
| 6 | 1.719974  | -5.679188 | 0.758473  |
| 1 | 1.508471  | -6.732542 | 0.959258  |
| 6 | 2.937343  | -5.303907 | 0.178432  |
| 1 | 3.677707  | -6.064728 | -0.081715 |
| 6 | -1.245904 | 1.748641  | -2.775924 |
| 1 | -0.566509 | 2.402355  | -2.217753 |
| 1 | -1.680546 | 2.347778  | -3.590314 |
| 1 | -0.670127 | 0.940947  | -3.233658 |
| 6 | 4.776462  | 0.240513  | 2.125105  |
| 1 | 4.994193  | 1.044385  | 1.407514  |
| 1 | 5.608290  | 0.165251  | 2.843952  |
| 1 | 3.866253  | 0.525722  | 2.674983  |
| 6 | 5.843856  | -1.454282 | 0.614802  |
| 1 | 5.744157  | -2.416946 | 0.091905  |
| 1 | 6.697268  | -1.529124 | 1.307293  |
| 1 | 6.069970  | -0.679182 | -0.133593 |
| 6 | 0.004165  | -1.527374 | -2.599085 |
| 1 | -0.166638 | -2.548837 | -2.229401 |
| 1 | -0.141245 | -1.533315 | -3.691412 |
| 1 | -0.746640 | -0.885301 | -2.135066 |
| 6 | 2.391018  | -2.178988 | -2.676641 |
| 1 | 3.430417  | -1.969462 | -2.382764 |
| 1 | 2.359193  | -2.225110 | -3.775796 |
| 1 | 2.107957  | -3.168794 | -2.301817 |
| 6 | -3.204403 | 0.223115  | -2.781575 |
| 1 | -2.680477 | -0.728838 | -2.932458 |
| 1 | -3.380800 | 0.683021  | -3.765970 |
| 1 | -4.189519 | 0.004268  | -2.350468 |
| 6 | -3.329971 | 2.391544  | -1.572596 |
| 1 | -4.089576 | 2.112579  | -0.830849 |
| 1 | -3.848697 | 2.707554  | -2.492006 |
| 1 | -2.777314 | 3.256727  | -1.190756 |
| 6 | 4.247093  | -2.179655 | 2.443954  |
| 1 | 3.259023  | -2.007174 | 2.898022  |
| 1 | 5.000793  | -2.129687 | 3.245451  |
| 1 | 4.258048  | -3.198267 | 2.039636  |
| 6 | -5.724238 | 0.717094  | 1.785174  |
| 1 | -6.404240 | 0.623002  | 2.646505  |
| 1 | -6.128570 | 0.105975  | 0.966291  |
| 1 | -5.719747 | 1.768761  | 1.459540  |
| 6 | -4.297866 | -1.201216 | 2.645318  |
| 1 | -3.265008 | -1.556801 | 2.783499  |
| 1 | -4.797360 | -1.879449 | 1.944558  |
| 1 | -4.816250 | -1.277424 | 3.614070  |
| 6 | 3.425142  | 3.503526  | -0.644967 |
| 1 | 4.469455  | 3.740544  | -0.869133 |
| 6 | 2.522138  | 4.500963  | -0.308648 |
| 6 | 2.587554  | 6.009907  | -0.112355 |
| 1 | 2.840089  | 6.527515  | -1.053129 |
| 1 | 3.367528  | 6.291772  | 0.614337  |
| 1 | 1.196572  | 6.890862  | 1.393910  |
| 1 | 0.684836  | 7.166258  | -0.272174 |

**Table S19****B3LYP-D3/def2-SVP**Prod-Si (with C<sub>2</sub>H<sub>4</sub>)1<sup>st</sup> frequency = 16.3 cm<sup>-1</sup>

G = -2507.420987 Hartree

| Atomic<br>Number | Coordinates (Angstroms) |           |           |
|------------------|-------------------------|-----------|-----------|
|                  | X                       | Y         | Z         |
| 14               | 1.248099                | 0.322668  | -0.001526 |
| 14               | -1.127632               | 0.334463  | 0.051125  |
| 6                | 0.124079                | 2.858361  | -0.249247 |
| 6                | -0.707968               | -0.388611 | 1.768163  |
| 1                | -1.284984               | -0.012600 | 2.624269  |
| 1                | -0.865896               | -1.480857 | 1.720677  |
| 6                | 1.388281                | 2.174622  | -0.341127 |
| 6                | 2.528296                | 2.925967  | -0.613206 |
| 1                | 3.489061                | 2.407619  | -0.667614 |
| 6                | 0.133007                | 4.260315  | -0.417030 |
| 7                | 2.375018                | -0.870317 | -0.749974 |
| 7                | -2.520409               | -0.466874 | -0.744477 |
| 6                | 3.541639                | -0.888780 | 0.012306  |
| 6                | 5.676521                | -2.241596 | -0.294850 |
| 1                | 6.169065                | -1.364638 | -0.718138 |
| 6                | 4.397213                | -4.501599 | 0.738470  |
| 1                | 3.894661                | -5.382612 | 1.145810  |
| 6                | 3.693693                | -3.304137 | 0.594655  |
| 1                | 2.640991                | -3.240936 | 0.879254  |
| 6                | 4.331150                | -2.160921 | 0.088245  |
| 6                | 4.630593                | 0.425220  | 1.847310  |
| 6                | -4.521532               | 0.015131  | 2.351586  |
| 6                | -2.859922               | -0.411655 | -2.205904 |
| 6                | 2.165560                | -1.442215 | -2.115491 |
| 6                | -3.969385               | 1.117585  | 3.280169  |
| 1                | -2.916423               | 0.924131  | 3.531832  |
| 1                | -4.545012               | 1.168150  | 4.218265  |
| 1                | -4.016254               | 2.096779  | 2.780724  |
| 7                | 3.712056                | 0.166560  | 0.730695  |
| 6                | -2.277979               | 3.041260  | 0.093314  |
| 1                | -3.239290               | 2.558847  | 0.291460  |
| 7                | -3.729011               | 0.116099  | 1.117324  |
| 6                | -2.235915               | 4.457325  | -0.066015 |
| 1                | -3.159701               | 5.037747  | 0.014621  |
| 6                | 1.886685                | -0.256973 | -3.063994 |
| 1                | 1.067115                | 0.374286  | -2.696175 |
| 1                | 1.617379                | -0.611335 | -4.071576 |
| 1                | 2.780252                | 0.381180  | -3.142455 |
| 6                | -1.146518               | 2.231094  | 0.008460  |
| 6                | -1.024142               | 5.066558  | -0.327855 |
| 6                | -4.201309               | -2.093010 | 0.053886  |
| 6                | -0.626506               | 6.513726  | -0.556107 |
| 6                | 0.814526                | -0.057284 | 1.834002  |
| 1                | 1.427094                | -0.865079 | 2.266912  |
| 1                | 0.999862                | 0.845213  | 2.436008  |
| 6                | -5.565953               | -2.256705 | -0.220158 |
| 1                | -6.196094               | -1.379229 | -0.371803 |

|   |           |           |           |
|---|-----------|-----------|-----------|
| 6 | -3.396445 | -3.234255 | 0.203350  |
| 1 | -2.327429 | -3.106449 | 0.386555  |
| 6 | -3.546984 | -0.745289 | 0.188487  |
| 6 | -3.951601 | -4.511147 | 0.117598  |
| 1 | -3.316334 | -5.390691 | 0.250355  |
| 6 | -6.119995 | -3.535984 | -0.327692 |
| 1 | -7.183599 | -3.649093 | -0.552670 |
| 6 | -5.316898 | -4.666308 | -0.150262 |
| 1 | -5.751461 | -5.666155 | -0.227800 |
| 6 | 5.741620  | -4.574341 | 0.357346  |
| 1 | 6.292122  | -5.512508 | 0.463217  |
| 6 | 6.376961  | -3.443058 | -0.165713 |
| 1 | 7.423150  | -3.497706 | -0.477228 |
| 6 | -1.725222 | 0.295348  | -2.961276 |
| 1 | -1.515939 | 1.295288  | -2.552632 |
| 1 | -2.007670 | 0.417895  | -4.017954 |
| 1 | -0.804843 | -0.297094 | -2.933672 |
| 6 | 3.992325  | 1.581395  | 2.645809  |
| 1 | 3.776623  | 2.431992  | 1.983170  |
| 1 | 4.662952  | 1.917036  | 3.452945  |
| 1 | 3.043575  | 1.259997  | 3.098370  |
| 6 | 5.985871  | 0.911643  | 1.294689  |
| 1 | 6.521002  | 0.105855  | 0.774283  |
| 1 | 6.628847  | 1.268227  | 2.115350  |
| 1 | 5.835848  | 1.743602  | 0.588976  |
| 6 | 0.974002  | -2.417492 | -2.066625 |
| 1 | 1.217112  | -3.273242 | -1.417731 |
| 1 | 0.735463  | -2.801004 | -3.071518 |
| 1 | 0.074676  | -1.932961 | -1.661893 |
| 6 | 3.383647  | -2.188794 | -2.684973 |
| 1 | 4.288357  | -1.564158 | -2.666434 |
| 1 | 3.170134  | -2.437254 | -3.736167 |
| 1 | 3.598999  | -3.125969 | -2.158398 |
| 6 | -3.029249 | -1.815164 | -2.824941 |
| 1 | -2.151431 | -2.440027 | -2.603588 |
| 1 | -3.126297 | -1.729692 | -3.919373 |
| 1 | -3.919491 | -2.335593 | -2.452219 |
| 6 | -4.147643 | 0.413632  | -2.395097 |
| 1 | -5.009908 | -0.062950 | -1.907375 |
| 1 | -4.386684 | 0.515809  | -3.465621 |
| 1 | -4.023977 | 1.418586  | -1.964334 |
| 6 | 4.838606  | -0.767886 | 2.802911  |
| 1 | 3.867037  | -1.181749 | 3.114940  |
| 1 | 5.370184  | -0.429623 | 3.706598  |
| 1 | 5.426355  | -1.577607 | 2.352187  |
| 6 | -5.999542 | 0.337288  | 2.052905  |
| 1 | -6.557550 | 0.472978  | 2.993062  |
| 1 | -6.482686 | -0.471572 | 1.489940  |
| 1 | -6.078580 | 1.267194  | 1.468155  |
| 6 | -4.398198 | -1.342442 | 3.071615  |
| 1 | -3.337805 | -1.608159 | 3.204375  |
| 1 | -4.889942 | -2.155977 | 2.523130  |
| 1 | -4.862379 | -1.279051 | 4.068744  |
| 6 | 2.503304  | 4.339420  | -0.799600 |
| 1 | 3.434722  | 4.872363  | -1.012046 |
| 6 | 1.299858  | 5.008638  | -0.692213 |
| 6 | 0.920517  | 6.473803  | -0.810500 |
| 1 | 1.178552  | 6.872241  | -1.806087 |
| 1 | 1.469609  | 7.090411  | -0.079485 |
| 1 | -0.877729 | 7.137784  | 0.317888  |

1      -1.169811      6.948157      -1.411835

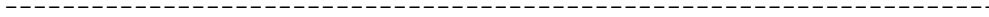

**Table S20****B3LYP-D3/def2-SVP**Prod-Ge (with C<sub>2</sub>H<sub>4</sub>)1<sup>st</sup> frequency = 10.2 cm<sup>-1</sup>

G = -6082.133102 Hartree

| Atomic<br>Number | Coordinates (Angstroms) |           |           |
|------------------|-------------------------|-----------|-----------|
|                  | X                       | Y         | Z         |
| 32               | 1.286257                | 0.148645  | 0.090016  |
| 32               | -1.196671               | 0.132974  | 0.109617  |
| 6                | 0.060070                | 2.722406  | -0.343522 |
| 6                | -0.723417               | -0.503424 | 1.952420  |
| 1                | -1.273137               | 0.018970  | 2.745603  |
| 1                | -0.982329               | -1.573336 | 2.009616  |
| 6                | 1.345589                | 2.077067  | -0.313581 |
| 6                | 2.484732                | 2.832352  | -0.567159 |
| 1                | 3.455298                | 2.331567  | -0.533973 |
| 6                | 0.052345                | 4.111181  | -0.615958 |
| 7                | 2.613561                | -0.997333 | -0.699499 |
| 7                | -2.685898               | -0.753789 | -0.712663 |
| 6                | 3.757536                | -0.868986 | 0.064950  |
| 6                | 6.076989                | -1.803395 | -0.401583 |
| 1                | 6.372225                | -0.844052 | -0.829741 |
| 6                | 5.300185                | -4.277385 | 0.640396  |
| 1                | 4.993753                | -5.242918 | 1.050951  |
| 6                | 4.381909                | -3.227863 | 0.572334  |
| 1                | 3.355859                | -3.365730 | 0.921231  |
| 6                | 4.766417                | -1.978700 | 0.060839  |
| 6                | 4.667076                | 0.507090  | 1.954514  |
| 6                | -4.495801               | 0.196358  | 2.372492  |
| 6                | -2.922655               | -0.824284 | -2.189345 |
| 6                | 2.429368                | -1.610254 | -2.044790 |
| 6                | -3.889968               | 1.386418  | 3.145049  |
| 1                | -2.824192               | 1.215501  | 3.352733  |
| 1                | -4.411090               | 1.543320  | 4.103062  |
| 1                | -3.964007               | 2.307750  | 2.547716  |
| 7                | 3.763278                | 0.155423  | 0.852340  |
| 6                | -2.364678               | 2.883855  | -0.163178 |
| 1                | -3.327872               | 2.399218  | 0.016099  |
| 7                | -3.716569               | 0.106701  | 1.128773  |
| 6                | -2.337541               | 4.284403  | -0.427313 |
| 1                | -3.274269               | 4.849056  | -0.446596 |
| 6                | 1.963463                | -0.489170 | -2.999371 |
| 1                | 1.068822                | 0.020385  | -2.619117 |
| 1                | 1.722629                | -0.893635 | -3.995120 |
| 1                | 2.754812                | 0.268302  | -3.108308 |
| 6                | -1.216550               | 2.099129  | -0.113110 |
| 6                | -1.122153               | 4.897230  | -0.656899 |
| 6                | -4.701628               | -1.938321 | 0.090747  |
| 6                | -0.738892               | 6.333961  | -0.960817 |
| 6                | 0.802514                | -0.268646 | 1.998895  |
| 1                | 1.382360                | -1.129535 | 2.366352  |
| 1                | 1.066300                | 0.601295  | 2.615502  |
| 6                | -6.044946               | -1.788734 | -0.278515 |
| 1                | -6.435087               | -0.796229 | -0.508652 |
| 6                | -4.210894               | -3.226002 | 0.363493  |
| 1                | -3.158213               | -3.344777 | 0.629403  |

|   |           |           |           |
|---|-----------|-----------|-----------|
| 6 | -3.744513 | -0.782211 | 0.200364  |
| 6 | -5.050987 | -4.337398 | 0.288928  |
| 1 | -4.658095 | -5.332489 | 0.512929  |
| 6 | -6.883815 | -2.903874 | -0.371392 |
| 1 | -7.926707 | -2.773722 | -0.671479 |
| 6 | -6.391289 | -4.179700 | -0.082993 |
| 1 | -7.048468 | -5.050285 | -0.151674 |
| 6 | 6.609099  | -4.094584 | 0.180264  |
| 1 | 7.327465  | -4.916842 | 0.228017  |
| 6 | 6.992627  | -2.857073 | -0.347007 |
| 1 | 8.009815  | -2.712126 | -0.719648 |
| 6 | -1.637110 | -0.406045 | -2.917299 |
| 1 | -1.310854 | 0.603642  | -2.624132 |
| 1 | -1.814628 | -0.393779 | -4.003430 |
| 1 | -0.822964 | -1.113366 | -2.721196 |
| 6 | 3.889922  | 1.522406  | 2.818632  |
| 1 | 3.507002  | 2.342842  | 2.193908  |
| 1 | 4.535406  | 1.942490  | 3.606390  |
| 1 | 3.030497  | 1.037536  | 3.303387  |
| 6 | 5.921721  | 1.211902  | 1.398066  |
| 1 | 6.549473  | 0.519411  | 0.821538  |
| 1 | 6.533463  | 1.614261  | 2.221556  |
| 1 | 5.633735  | 2.049402  | 0.743552  |
| 6 | 1.364685  | -2.718482 | -1.932869 |
| 1 | 1.735095  | -3.530851 | -1.288670 |
| 1 | 1.124162  | -3.140115 | -2.921939 |
| 1 | 0.436190  | -2.331596 | -1.488540 |
| 6 | 3.703573  | -2.215752 | -2.658795 |
| 1 | 4.520392  | -1.481608 | -2.703716 |
| 1 | 3.471857  | -2.523678 | -3.690290 |
| 1 | 4.061314  | -3.100140 | -2.118956 |
| 6 | -3.276810 | -2.249436 | -2.663532 |
| 1 | -2.536729 | -2.970506 | -2.284490 |
| 1 | -3.266196 | -2.287660 | -3.764796 |
| 1 | -4.270482 | -2.572708 | -2.331179 |
| 6 | -4.034803 | 0.167578  | -2.585051 |
| 1 | -4.994762 | -0.095305 | -2.120328 |
| 1 | -4.184076 | 0.167891  | -3.676759 |
| 1 | -3.766120 | 1.186857  | -2.268205 |
| 6 | 5.078275  | -0.677908 | 2.853344  |
| 1 | 4.189124  | -1.248654 | 3.164669  |
| 1 | 5.575225  | -0.300352 | 3.761325  |
| 1 | 5.771380  | -1.367810 | 2.355172  |
| 6 | -5.983144 | 0.511200  | 2.108163  |
| 1 | -6.475090 | 0.821605  | 3.043848  |
| 1 | -6.524148 | -0.361645 | 1.722575  |
| 1 | -6.078304 | 1.334869  | 1.382869  |
| 6 | -4.369144 | -1.078339 | 3.229970  |
| 1 | -3.309443 | -1.322474 | 3.401448  |
| 1 | -4.848670 | -1.941914 | 2.748458  |
| 1 | -4.849223 | -0.926036 | 4.210031  |
| 6 | 2.441996  | 4.229251  | -0.848145 |
| 1 | 3.373209  | 4.771455  | -1.036572 |
| 6 | 1.219213  | 4.869427  | -0.866440 |
| 6 | 0.821013  | 6.313524  | -1.110520 |
| 1 | 1.137581  | 6.649659  | -2.112165 |
| 1 | 1.308620  | 6.990279  | -0.389217 |
| 1 | -1.059962 | 7.010656  | -0.151310 |
| 1 | -1.232810 | 6.694194  | -1.878679 |

**Table S21****B3LYP-D3/def2-SVP**Prod-C (with Ph<sub>2</sub>CO)1<sup>st</sup> frequency = 25.8 cm<sup>-1</sup>

G = -2502.109496 Hartree

| Atomic<br>Number | Coordinates (Angstroms) |           |           |
|------------------|-------------------------|-----------|-----------|
|                  | X                       | Y         | Z         |
| 6                | 0.567652                | 0.274829  | 0.285584  |
| 6                | -0.993098               | 1.211070  | 0.120574  |
| 8                | -0.355425               | 2.199185  | 0.913285  |
| 7                | -2.500476               | -0.588061 | -1.040061 |
| 6                | -0.994451               | 1.558293  | -1.360438 |
| 6                | 1.089094                | 0.366730  | -1.159669 |
| 7                | -2.372828               | 0.996918  | 0.623657  |
| 7                | 0.781227                | -1.036526 | 0.887984  |
| 6                | 0.169314                | 1.071989  | -1.962250 |
| 7                | 3.100552                | -1.310153 | 0.886301  |
| 6                | 0.961827                | 1.669041  | 1.050044  |
| 6                | 1.963385                | 2.549657  | 0.286472  |
| 6                | 3.339392                | 2.290258  | 0.355624  |
| 1                | 3.694382                | 1.461569  | 0.961769  |
| 6                | 1.370681                | 1.699409  | 2.519850  |
| 6                | 0.429370                | 1.351272  | -3.302011 |
| 6                | -3.070416               | -0.044786 | -0.036393 |
| 6                | 1.625325                | 0.975744  | -3.935128 |
| 6                | 2.299591                | 0.050532  | -1.775093 |
| 1                | 3.105145                | -0.398103 | -1.211327 |
| 6                | -1.884720               | 2.281630  | -2.140836 |
| 1                | -2.822357               | 2.635894  | -1.714975 |
| 6                | 2.566595                | 0.331250  | -3.153932 |
| 1                | 3.542354                | 0.044236  | -3.555627 |
| 6                | 2.311687                | 0.816934  | 3.063876  |
| 1                | 2.733774                | 0.035861  | 2.429468  |
| 6                | -0.459574               | 2.081870  | -4.111303 |
| 6                | 1.970365                | -1.795284 | 0.560484  |
| 6                | -4.353415               | -0.559110 | 0.558869  |
| 6                | -0.039349               | -1.681138 | 1.989252  |
| 6                | -1.626151               | 2.544445  | -3.523391 |
| 1                | -2.360127               | 3.119914  | -4.094602 |
| 6                | -5.572866               | -0.443534 | -0.125070 |
| 1                | -5.608914               | 0.103883  | -1.068106 |
| 6                | 4.252785                | 3.062427  | -0.361028 |
| 1                | 5.319677                | 2.830909  | -0.298445 |
| 6                | 2.155682                | 1.925874  | 5.218767  |
| 1                | 2.452940                | 2.007025  | 6.267607  |
| 6                | 1.781816                | -3.119128 | -0.153841 |
| 6                | 1.240870                | 2.831801  | 4.671739  |
| 1                | 0.824653                | 3.632160  | 5.289422  |
| 6                | 2.694717                | 0.926829  | 4.404476  |
| 1                | 3.420608                | 0.218199  | 4.813828  |
| 6                | -2.916578               | -1.649493 | -1.960208 |
| 6                | -4.326084               | -1.253404 | 1.775947  |
| 1                | -3.387624               | -1.351482 | 2.317385  |
| 6                | -1.019817               | -2.696224 | 1.370127  |
| 1                | -1.662546               | -2.191398 | 0.642552  |
| 1                | -1.654684               | -3.148370 | 2.148855  |



|   |           |           |           |
|---|-----------|-----------|-----------|
| 1 | -0.496932 | -3.509111 | 0.851967  |
| 6 | 0.858477  | 2.723840  | 3.332976  |
| 1 | 0.158792  | 3.444381  | 2.908786  |
| 6 | 1.404573  | -3.117394 | -1.504084 |
| 1 | 1.195777  | -2.172165 | -1.997665 |
| 6 | -1.603069 | -2.238492 | -2.502759 |
| 1 | -0.955029 | -1.435299 | -2.883033 |
| 1 | -1.791998 | -2.964063 | -3.310348 |
| 1 | -1.068542 | -2.754743 | -1.697133 |
| 6 | 3.807091  | 4.125982  | -1.153663 |
| 1 | 4.521027  | 4.734604  | -1.714835 |
| 6 | 4.463926  | -1.839603 | 0.687291  |
| 6 | 2.440142  | 4.404668  | -1.213701 |
| 1 | 2.075099  | 5.234730  | -1.824516 |
| 6 | 0.869540  | -2.392681 | 3.015811  |
| 1 | 1.416514  | -3.242952 | 2.601618  |
| 1 | 0.237953  | -2.787187 | 3.826228  |
| 1 | 1.591984  | -1.695045 | 3.456457  |
| 6 | -0.828506 | -0.651611 | 2.793372  |
| 1 | -0.174343 | 0.034094  | 3.338417  |
| 1 | -1.444982 | -1.180460 | 3.536428  |
| 1 | -1.493394 | -0.075320 | 2.156895  |
| 6 | 1.525329  | 3.623818  | -0.499184 |
| 1 | 0.459664  | 3.838727  | -0.564896 |
| 6 | -3.056305 | 2.132369  | 1.424690  |
| 6 | 0.167356  | 2.195844  | -5.493156 |
| 6 | 1.561688  | 1.468006  | -5.372199 |
| 6 | -6.705104 | -1.690150 | 1.614551  |
| 1 | -7.618561 | -2.127443 | 2.025400  |
| 6 | -5.492802 | -1.819905 | 2.297733  |
| 1 | -5.452377 | -2.363235 | 3.245308  |
| 6 | -2.717871 | 3.543257  | 0.868263  |
| 1 | -1.650634 | 3.734146  | 0.758596  |
| 1 | -3.125180 | 4.288332  | 1.568358  |
| 1 | -3.208980 | 3.711300  | -0.099680 |
| 6 | -6.740959 | -0.995194 | 0.400049  |
| 1 | -7.684456 | -0.884019 | -0.140417 |
| 6 | 4.821323  | -2.655944 | 1.946173  |
| 1 | 4.643202  | -2.061707 | 2.855715  |
| 1 | 5.884583  | -2.942393 | 1.921047  |
| 1 | 4.222379  | -3.573888 | 2.012013  |
| 6 | 1.313493  | -4.308717 | -2.228032 |
| 1 | 1.021981  | -4.273698 | -3.280641 |
| 6 | 4.725365  | -2.676538 | -0.585443 |
| 1 | 4.275663  | -3.674368 | -0.548059 |
| 1 | 5.812079  | -2.804201 | -0.709593 |
| 1 | 4.342049  | -2.168451 | -1.482237 |
| 6 | 5.389401  | -0.604568 | 0.639326  |
| 1 | 5.168292  | 0.021919  | -0.237396 |
| 1 | 6.444397  | -0.913932 | 0.581083  |
| 1 | 5.258217  | 0.011435  | 1.541048  |
| 6 | 2.059110  | -4.357203 | 0.451527  |
| 1 | 2.372579  | -4.398455 | 1.493633  |
| 6 | -3.750549 | -2.819505 | -1.387584 |
| 1 | -3.304067 | -3.205715 | -0.460246 |
| 1 | -3.763290 | -3.640561 | -2.121883 |
| 1 | -4.791071 | -2.550670 | -1.174661 |
| 6 | 1.949399  | -5.551552 | -0.262722 |
| 1 | 2.161897  | -6.500233 | 0.236736  |
| 6 | -2.663613 | 2.034010  | 2.908719  |

|   |           |           |           |
|---|-----------|-----------|-----------|
| 1 | -3.030687 | 1.092292  | 3.341296  |
| 1 | -3.123220 | 2.862116  | 3.470789  |
| 1 | -1.581339 | 2.082461  | 3.047284  |
| 6 | 1.579077  | -5.533038 | -1.610877 |
| 1 | 1.498836  | -6.466176 | -2.174162 |
| 6 | -3.667294 | -0.980227 | -3.130783 |
| 1 | -4.628619 | -0.560035 | -2.802420 |
| 1 | -3.871724 | -1.717377 | -3.924012 |
| 1 | -3.061362 | -0.164484 | -3.552933 |
| 6 | -4.599535 | 2.103133  | 1.366150  |
| 1 | -4.976145 | 2.088575  | 0.335122  |
| 1 | -4.948311 | 3.039109  | 1.827286  |
| 1 | -5.054874 | 1.282327  | 1.925973  |
| 1 | 2.394958  | 2.154688  | -5.595635 |
| 1 | 1.645819  | 0.634697  | -6.089511 |
| 1 | -0.465563 | 1.724574  | -6.263675 |
| 1 | 0.288873  | 3.249531  | -5.794373 |

---

**Table S22****B3LYP-D3/def2-SVP**Prod-Si (with Ph<sub>2</sub>CO)1<sup>st</sup> frequency = 12.0 cm<sup>-1</sup>

G = -3005.023236 Hartree

| Atomic<br>Number | Coordinates (Angstroms) |           |           |
|------------------|-------------------------|-----------|-----------|
|                  | X                       | Y         | Z         |
| 14               | 0.723005                | 0.061254  | -0.260607 |
| 14               | -1.524949               | -0.507491 | -0.286189 |
| 8                | -0.944337               | -1.139034 | -1.838047 |
| 7                | -2.563095               | 0.729503  | 0.956414  |
| 6                | -1.269445               | -1.928489 | 0.935458  |
| 6                | 1.165979                | -1.128950 | 1.150507  |
| 7                | -3.299438               | -0.268003 | -0.820430 |
| 7                | 1.513392                | 1.648021  | -0.242389 |
| 6                | 0.061167                | -2.004562 | 1.481681  |
| 7                | 3.677909                | 0.829446  | -0.392796 |
| 6                | 0.485066                | -1.056864 | -1.897172 |
| 6                | 1.101204                | -2.447037 | -1.723223 |
| 6                | 2.492489                | -2.611388 | -1.640660 |
| 1                | 3.133909                | -1.735808 | -1.706789 |
| 6                | 0.918731                | -0.435615 | -3.219638 |
| 6                | 0.303192                | -3.019067 | 2.434465  |
| 6                | -3.619501               | 0.579694  | 0.184824  |
| 6                | 1.541570                | -3.202471 | 3.091533  |
| 6                | 2.369924                | -1.324842 | 1.818222  |
| 1                | 3.213061                | -0.683037 | 1.574519  |
| 6                | -2.214168               | -2.861154 | 1.349852  |
| 1                | -3.227176               | -2.803883 | 0.937516  |
| 6                | 2.576923                | -2.342172 | 2.793873  |
| 1                | 3.555570                | -2.434917 | 3.273413  |
| 6                | 2.162614                | 0.200729  | -3.366890 |
| 1                | 2.822569                | 0.307534  | -2.502638 |
| 6                | -0.667847               | -3.962714 | 2.841540  |
| 6                | 2.885694                | 1.685172  | 0.130268  |
| 6                | -4.934697               | 1.258400  | 0.365848  |
| 6                | 0.895121                | 2.901845  | -0.826694 |
| 6                | -1.932722               | -3.891143 | 2.293556  |
| 1                | -2.717338               | -4.599396 | 2.575115  |
| 6                | -5.984665               | 0.639022  | 1.055509  |
| 1                | -5.846647               | -0.366390 | 1.458560  |
| 6                | 3.060568                | -3.868538 | -1.437829 |
| 1                | 4.147926                | -3.963012 | -1.366260 |
| 6                | 1.703280                | 0.643755  | -5.709699 |
| 1                | 2.005736                | 1.064023  | -6.672608 |
| 6                | 3.214446                | 2.670017  | 1.221151  |
| 6                | 0.461785                | 0.014463  | -5.571164 |
| 1                | -0.210773               | -0.064403 | -6.430066 |
| 6                | 2.551425                | 0.729520  | -4.601833 |
| 1                | 3.522451                | 1.225355  | -4.691681 |
| 6                | -2.454558               | 1.285844  | 2.319317  |
| 6                | -5.116480               | 2.542343  | -0.168569 |
| 1                | -4.294641               | 3.023797  | -0.703507 |
| 6                | 0.558927                | 3.956204  | 0.249883  |
| 1                | -0.050415               | 3.514237  | 1.049752  |
| 1                | -0.020440               | 4.774954  | -0.206468 |

|   |           |           |           |
|---|-----------|-----------|-----------|
| 1 | 1.450468  | 4.397909  | 0.709172  |
| 6 | 0.075186  | -0.520848 | -4.339541 |
| 1 | -0.887619 | -1.020936 | -4.233907 |
| 6 | 2.661110  | 2.434240  | 2.489895  |
| 1 | 2.020560  | 1.562487  | 2.637758  |
| 6 | -0.972225 | 1.219398  | 2.722880  |
| 1 | -0.620960 | 0.181827  | 2.781211  |
| 1 | -0.831661 | 1.684470  | 3.710309  |
| 1 | -0.340004 | 1.751490  | 2.000753  |
| 6 | 2.244372  | -4.998529 | -1.311994 |
| 1 | 2.686094  | -5.984720 | -1.145495 |
| 6 | 5.112532  | 0.607339  | -0.126369 |
| 6 | 0.858307  | -4.848051 | -1.396080 |
| 1 | 0.205114  | -5.719419 | -1.295428 |
| 6 | 1.859010  | 3.500619  | -1.867557 |
| 1 | 2.818974  | 3.789148  | -1.418938 |
| 1 | 1.419173  | 4.407344  | -2.311789 |
| 1 | 2.056607  | 2.778448  | -2.670861 |
| 6 | -0.419364 | 2.556244  | -1.552703 |
| 1 | -0.287504 | 1.755365  | -2.294370 |
| 1 | -0.769098 | 3.449254  | -2.092763 |
| 1 | -1.207886 | 2.267847  | -0.843840 |
| 6 | 0.291806  | -3.585243 | -1.600393 |
| 1 | -0.790305 | -3.471944 | -1.645202 |
| 6 | -4.009584 | -0.566547 | -2.095780 |
| 6 | -0.044295 | -4.898272 | 3.861130  |
| 6 | 1.427553  | -4.387785 | 4.031288  |
| 6 | -7.386691 | 2.577593  | 0.674180  |
| 1 | -8.343767 | 3.091297  | 0.793637  |
| 6 | -6.339850 | 3.197958  | -0.016249 |
| 1 | -6.476465 | 4.197077  | -0.437146 |
| 6 | -3.685902 | -2.021957 | -2.484778 |
| 1 | -2.606413 | -2.165641 | -2.603195 |
| 1 | -4.187029 | -2.273212 | -3.432272 |
| 1 | -4.051994 | -2.712855 | -1.708482 |
| 6 | -7.206156 | 1.298800  | 1.210768  |
| 1 | -8.021904 | 0.809968  | 1.748915  |
| 6 | 5.903269  | 1.521309  | -1.085244 |
| 1 | 5.556293  | 1.383104  | -2.120874 |
| 1 | 6.977331  | 1.279730  | -1.043418 |
| 1 | 5.782352  | 2.580790  | -0.819658 |
| 6 | 2.935356  | 3.295787  | 3.553140  |
| 1 | 2.507785  | 3.093393  | 4.538501  |
| 6 | 5.597940  | 0.819466  | 1.324963  |
| 1 | 5.622833  | 1.874017  | 1.620333  |
| 1 | 6.619823  | 0.421464  | 1.424337  |
| 1 | 4.958912  | 0.284857  | 2.042927  |
| 6 | 5.395165  | -0.857674 | -0.518164 |
| 1 | 4.807144  | -1.553708 | 0.097276  |
| 1 | 6.462839  | -1.094352 | -0.388711 |
| 1 | 5.130111  | -1.031396 | -1.571035 |
| 6 | 4.030849  | 3.793332  | 1.032804  |
| 1 | 4.459258  | 3.996108  | 0.050349  |
| 6 | -2.913886 | 2.756094  | 2.382196  |
| 1 | -2.392652 | 3.357335  | 1.621338  |
| 1 | -2.675876 | 3.176347  | 3.371963  |
| 1 | -3.994889 | 2.862647  | 2.226397  |
| 6 | 4.290072  | 4.667167  | 2.092319  |
| 1 | 4.919756  | 5.545442  | 1.928919  |
| 6 | -3.503890 | 0.413076  | -3.171382 |

|   |           |           |           |
|---|-----------|-----------|-----------|
| 1 | -3.767076 | 1.448086  | -2.898374 |
| 1 | -3.961108 | 0.191003  | -4.148947 |
| 1 | -2.413092 | 0.342372  | -3.269200 |
| 6 | 3.746683  | 4.418890  | 3.356584  |
| 1 | 3.952969  | 5.100154  | 4.185956  |
| 6 | -3.266220 | 0.425220  | 3.308067  |
| 1 | -4.345788 | 0.508494  | 3.120605  |
| 1 | -3.079470 | 0.754946  | 4.342567  |
| 1 | -2.971055 | -0.631432 | 3.219458  |
| 6 | -5.542074 | -0.458445 | -1.986397 |
| 1 | -5.929946 | -1.067228 | -1.156771 |
| 1 | -5.979328 | -0.842987 | -2.920316 |
| 1 | -5.897964 | 0.570644  | -1.858503 |
| 1 | 2.161303  | -5.169288 | 3.773124  |
| 1 | 1.640432  | -4.094913 | 5.073044  |
| 1 | -0.596596 | -4.876952 | 4.815461  |
| 1 | -0.072514 | -5.943198 | 3.510058  |

---

**Table S23**  
**B3LYP-D3/def2-SVP**  
 Prod-Ge (with Ph<sub>2</sub>CO)  
 G = -6579.725521 Hartree

| Atomic<br>Number | Coordinates (Angstroms) |           |           |
|------------------|-------------------------|-----------|-----------|
|                  | X                       | Y         | Z         |
| 32               | 0.976343                | 0.060130  | 0.054222  |
| 32               | -1.466557               | 0.024574  | 0.539076  |
| 8                | -0.633692               | -0.306787 | 2.258019  |
| 7                | -2.800659               | -0.272694 | -1.194424 |
| 6                | -1.600354               | 1.992380  | 0.419786  |
| 6                | 0.738038                | 1.919806  | -0.633820 |
| 7                | -3.292419               | -0.646718 | 0.922996  |
| 7                | 1.864550                | -1.149208 | -1.211944 |
| 6                | -0.484453               | 2.584487  | -0.262743 |
| 7                | 3.270751                | 0.206844  | -0.150504 |
| 6                | 0.745477                | -0.407647 | 2.140979  |
| 6                | 1.426051                | 0.627520  | 3.022212  |
| 6                | 2.561397                | 0.356261  | 3.804456  |
| 1                | 2.989489                | -0.645731 | 3.815779  |
| 6                | 1.222132                | -1.841767 | 2.333931  |
| 6                | -0.632033               | 3.931409  | -0.669689 |
| 6                | -3.722876               | -0.693696 | -0.361953 |
| 6                | 0.305807                | 4.617088  | -1.474328 |
| 6                | 1.626868                | 2.594846  | -1.461339 |
| 1                | 2.538860                | 2.087121  | -1.779416 |
| 6                | -2.708108               | 2.777509  | 0.709806  |
| 1                | -3.567838               | 2.313599  | 1.204516  |
| 6                | 1.426314                | 3.935021  | -1.902703 |
| 1                | 2.168928                | 4.405052  | -2.553857 |
| 6                | 2.512939                | -2.272095 | 1.976170  |
| 1                | 3.210390                | -1.558231 | 1.542232  |
| 6                | -1.759554               | 4.726179  | -0.357104 |
| 6                | 3.149457                | -0.707436 | -1.076525 |
| 6                | -5.079876               | -1.177049 | -0.766055 |
| 6                | 1.387899                | -2.401079 | -1.875147 |
| 6                | -2.796907               | 4.155652  | 0.353043  |
| 1                | -3.692421               | 4.727541  | 0.613290  |
| 6                | -6.171708               | -0.299621 | -0.818185 |
| 1                | -6.028641               | 0.750926  | -0.557453 |
| 6                | 3.150208                | 1.351205  | 4.593398  |
| 1                | 4.034988                | 1.109415  | 5.188883  |
| 6                | 2.019498                | -4.534738 | 2.700183  |
| 1                | 2.326657                | -5.574706 | 2.837890  |
| 6                | 4.258746                | -1.178644 | -1.963240 |
| 6                | 0.734583                | -4.120494 | 3.061529  |
| 1                | 0.028425                | -4.836618 | 3.491187  |
| 6                | 2.909061                | -3.598249 | 2.162339  |
| 1                | 3.919597                | -3.904138 | 1.876306  |
| 6                | -2.870529               | 0.032538  | -2.633451 |
| 6                | -5.264670               | -2.527231 | -1.094674 |
| 1                | -4.412842               | -3.210036 | -1.060789 |
| 6                | 1.237248                | -2.184787 | -3.393427 |
| 1                | 0.588094                | -1.323026 | -3.603152 |
| 1                | 0.787724                | -3.075060 | -3.861947 |
| 1                | 2.210899                | -2.012101 | -3.871063 |

|   |           |           |           |
|---|-----------|-----------|-----------|
| 6 | 0.344641  | -2.789547 | 2.883401  |
| 1 | -0.648665 | -2.457773 | 3.180137  |
| 6 | 4.341201  | -0.686426 | -3.273546 |
| 1 | 3.574415  | 0.001716  | -3.635663 |
| 6 | -1.523389 | 0.674706  | -3.010817 |
| 1 | -1.399363 | 1.647447  | -2.518635 |
| 1 | -1.464589 | 0.827304  | -4.099425 |
| 1 | -0.680608 | 0.040911  | -2.706920 |
| 6 | 2.613882  | 2.639199  | 4.626891  |
| 1 | 3.077563  | 3.417757  | 5.238096  |
| 6 | 4.451388  | 1.014118  | 0.242364  |
| 6 | 1.463900  | 2.914832  | 3.876663  |
| 1 | 1.019129  | 3.913416  | 3.900928  |
| 6 | 2.323720  | -3.598777 | -1.611333 |
| 1 | 3.269157  | -3.525070 | -2.160500 |
| 1 | 1.827286  | -4.524541 | -1.941029 |
| 1 | 2.538020  | -3.691544 | -0.537141 |
| 6 | 0.014206  | -2.771322 | -1.286163 |
| 1 | 0.080297  | -2.937883 | -0.200310 |
| 1 | -0.339831 | -3.702298 | -1.754827 |
| 1 | -0.738635 | -1.996284 | -1.469991 |
| 6 | 0.874788  | 1.922637  | 3.094951  |
| 1 | -0.029978 | 2.147278  | 2.530698  |
| 6 | -3.902663 | -1.224682 | 2.150963  |
| 6 | -1.556137 | 6.112221  | -0.942257 |
| 6 | -0.198849 | 6.026571  | -1.721944 |
| 6 | -7.616691 | -2.118628 | -1.505268 |
| 1 | -8.605948 | -2.485299 | -1.790207 |
| 6 | -6.529262 | -2.996599 | -1.460590 |
| 1 | -6.664996 | -4.051522 | -1.711513 |
| 6 | -3.378125 | -0.428225 | 3.361243  |
| 1 | -2.284755 | -0.458179 | 3.431149  |
| 1 | -3.809828 | -0.838087 | 4.287514  |
| 1 | -3.684776 | 0.627116  | 3.278906  |
| 6 | -7.433888 | -0.768533 | -1.186357 |
| 1 | -8.280247 | -0.078077 | -1.221087 |
| 6 | 5.310947  | 0.210612  | 1.240358  |
| 1 | 4.729379  | -0.038574 | 2.138416  |
| 1 | 6.179791  | 0.808833  | 1.557691  |
| 1 | 5.686351  | -0.717913 | 0.789518  |
| 6 | 5.407742  | -1.051395 | -4.098466 |
| 1 | 5.468443  | -0.654132 | -5.114689 |
| 6 | 5.334084  | 1.474257  | -0.938036 |
| 1 | 5.928276  | 0.661228  | -1.372583 |
| 1 | 6.035680  | 2.244155  | -0.580835 |
| 1 | 4.726985  | 1.922085  | -1.739151 |
| 6 | 3.932491  | 2.270781  | 0.967312  |
| 1 | 3.411201  | 2.948812  | 0.280198  |
| 1 | 4.777685  | 2.816885  | 1.413814  |
| 1 | 3.237174  | 2.004016  | 1.769763  |
| 6 | 5.250296  | -2.051444 | -1.493560 |
| 1 | 5.176253  | -2.456062 | -0.482811 |
| 6 | -3.065169 | -1.248602 | -3.468868 |
| 1 | -2.270864 | -1.977960 | -3.248693 |
| 1 | -3.023086 | -1.010085 | -4.543718 |
| 1 | -4.036082 | -1.721084 | -3.266999 |
| 6 | 6.311836  | -2.422943 | -2.321200 |
| 1 | 7.076603  | -3.108326 | -1.947640 |
| 6 | -3.494252 | -2.706013 | 2.255334  |
| 1 | -3.928311 | -3.283734 | 1.424068  |

|   |           |           |           |
|---|-----------|-----------|-----------|
| 1 | -3.848797 | -3.147727 | 3.200574  |
| 1 | -2.401957 | -2.809157 | 2.209354  |
| 6 | 6.396027  | -1.919737 | -3.623975 |
| 1 | 7.230183  | -2.206101 | -4.269298 |
| 6 | -3.980445 | 1.055091  | -2.953509 |
| 1 | -4.983235 | 0.618163  | -2.864874 |
| 1 | -3.866766 | 1.420965  | -3.986597 |
| 1 | -3.905793 | 1.917018  | -2.272261 |
| 6 | -5.442043 | -1.119471 | 2.188897  |
| 1 | -5.774467 | -0.091450 | 1.982457  |
| 1 | -5.780122 | -1.385923 | 3.201994  |
| 1 | -5.945009 | -1.795830 | 1.488634  |
| 1 | 0.524209  | 6.780737  | -1.369631 |
| 1 | -0.338385 | 6.212404  | -2.800171 |
| 1 | -2.391504 | 6.400226  | -1.601618 |
| 1 | -1.514311 | 6.874041  | -0.145659 |

---

**Table S21-S28.** Geometrical coordinates of the reactants and products for the reaction of Rea-E (E = Sn and Pb) with C<sub>2</sub>H<sub>4</sub> and Ph<sub>2</sub>CO at B3LYP-D3/def2-SVP level of theory.



**Table S24****B3LYP-D3/def2-SVP**

Rea-Sn(Singlet)

E = -2279.60880002 Hartree

G = -2278.834171 Hartree

| Atomic<br>Number | Coordinates (Angstroms) |           |           |
|------------------|-------------------------|-----------|-----------|
|                  | X                       | Y         | Z         |
| 50               | -1.568273               | -0.786620 | -0.633930 |
| 7                | -3.223954               | -0.839602 | 0.929488  |
| 7                | -3.767489               | -0.579187 | -1.209357 |
| 6                | -4.783774               | -2.208277 | -2.776645 |
| 1                | -3.872085               | -2.822706 | -2.712166 |
| 1                | -5.215730               | -2.333775 | -3.783040 |
| 1                | -5.511842               | -2.590599 | -2.046417 |
| 6                | -0.000032               | 2.054399  | 0.000256  |
| 6                | -5.740793               | 0.120214  | -2.615591 |
| 1                | -6.559216               | -0.277351 | -2.002689 |
| 1                | -6.084225               | 0.130829  | -3.662295 |
| 1                | -5.549325               | 1.159687  | -2.307453 |
| 6                | -3.459283               | -0.222014 | -3.562584 |
| 1                | -3.200580               | 0.832392  | -3.379472 |
| 1                | -3.886306               | -0.307946 | -4.573564 |
| 1                | -2.528593               | -0.813096 | -3.541377 |
| 6                | -4.054980               | -1.828080 | 3.077382  |
| 1                | -5.129572               | -1.754382 | 2.865324  |
| 1                | -3.925289               | -1.776594 | 4.170454  |
| 1                | -3.699887               | -2.812609 | 2.734135  |
| 6                | -1.138369               | 4.283265  | -0.262393 |
| 6                | -1.789113               | -0.791744 | 2.865218  |
| 1                | -1.336031               | -1.749225 | 2.564028  |
| 1                | -1.727708               | -0.713531 | 3.961557  |
| 1                | -1.195154               | 0.030233  | 2.435398  |
| 6                | -1.257920               | 1.424102  | -0.328205 |
| 6                | -3.804187               | 0.679223  | 2.808783  |
| 1                | -3.269389               | 1.475918  | 2.269309  |
| 1                | -3.670879               | 0.836531  | 3.891392  |
| 1                | -4.876927               | 0.765925  | 2.590303  |
| 6                | -6.276231               | -2.100508 | 0.522993  |
| 1                | -5.677446               | -3.004820 | 0.394380  |
| 6                | -0.000079               | 3.482998  | 0.000432  |
| 6                | -4.209283               | -0.751142 | 0.039474  |
| 6                | -5.664633               | -0.845697 | 0.391555  |
| 6                | -4.455990               | -0.726875 | -2.501101 |
| 6                | -3.253070               | -0.701366 | 2.395612  |
| 6                | -2.363459               | 2.239996  | -0.575687 |
| 1                | -3.316080               | 1.765667  | -0.826211 |
| 6                | -8.396501               | -1.035587 | 1.011235  |
| 1                | -9.459950               | -1.109161 | 1.252206  |
| 6                | -2.333928               | 3.661235  | -0.541926 |
| 1                | -3.244614               | 4.231856  | -0.748559 |
| 6                | -7.636958               | -2.195393 | 0.826831  |
| 1                | -8.104325               | -3.178527 | 0.924045  |
| 6                | -0.761897               | 5.749062  | -0.173031 |
| 1                | -1.356985               | 6.266720  | 0.598036  |
| 1                | -0.965607               | 6.272510  | -1.122274 |
| 6                | -6.431921               | 0.313630  | 0.575482  |

|    |           |           |           |
|----|-----------|-----------|-----------|
| 1  | -5.960483 | 1.292109  | 0.462441  |
| 6  | -7.789999 | 0.218972  | 0.887977  |
| 1  | -8.378442 | 1.128667  | 1.031295  |
| 50 | 1.568322  | -0.786646 | 0.633629  |
| 7  | 3.224043  | -0.839182 | -0.929676 |
| 7  | 3.767513  | -0.579367 | 1.209265  |
| 6  | 4.783924  | -2.209221 | 2.775740  |
| 1  | 3.872310  | -2.823726 | 2.710917  |
| 1  | 5.215866  | -2.335200 | 3.782079  |
| 1  | 5.512058  | -2.591071 | 2.045331  |
| 6  | 5.740618  | 0.119505  | 2.615991  |
| 1  | 6.559133  | -0.277631 | 2.002936  |
| 1  | 6.083990  | 0.129640  | 3.662720  |
| 1  | 5.549001  | 1.159105  | 2.308370  |
| 6  | 3.459124  | -0.223568 | 3.562682  |
| 1  | 3.200092  | 0.830829  | 3.379976  |
| 1  | 3.886210  | -0.309743 | 4.573614  |
| 1  | 2.528618  | -0.814930 | 3.541281  |
| 6  | 4.054859  | -1.826826 | -3.078025 |
| 1  | 5.129473  | -1.753371 | -2.865992 |
| 1  | 3.925119  | -1.774870 | -4.171070 |
| 1  | 3.699638  | -2.811443 | -2.735167 |
| 6  | 1.138159  | 4.283273  | 0.263458  |
| 6  | 1.789179  | -0.790195 | -2.865373 |
| 1  | 1.335892  | -1.747668 | -2.564465 |
| 1  | 1.727801  | -0.711666 | -3.961691 |
| 1  | 1.195395  | 0.031791  | -2.435333 |
| 6  | 1.257898  | 1.424112  | 0.328571  |
| 6  | 3.804496  | 0.680407  | -2.808309 |
| 1  | 3.269778  | 1.476953  | -2.268534 |
| 1  | 3.671259  | 0.838187  | -3.890857 |
| 1  | 4.877239  | 0.766876  | -2.589743 |
| 6  | 6.276066  | -2.100367 | -0.523926 |
| 1  | 5.677109  | -3.004644 | -0.395864 |
| 6  | 4.209351  | -0.750968 | -0.039602 |
| 6  | 5.664698  | -0.845526 | -0.391698 |
| 6  | 4.455954  | -0.727718 | 2.500979  |
| 6  | 3.253154  | -0.700273 | -2.395743 |
| 6  | 2.363382  | 2.240012  | 0.576276  |
| 1  | 3.316028  | 1.765677  | 0.826710  |
| 6  | 8.396524  | -1.035530 | -1.011526 |
| 1  | 9.459958  | -1.109148 | -1.252552 |
| 6  | 2.333756  | 3.661257  | 0.542861  |
| 1  | 3.244399  | 4.231891  | 0.749648  |
| 6  | 7.636773  | -2.195313 | -0.827834 |
| 1  | 8.103962  | -3.178471 | -0.925658 |
| 6  | 0.761595  | 5.749068  | 0.174441  |
| 1  | 1.356651  | 6.266943  | -0.596505 |
| 1  | 0.965273  | 6.272306  | 1.123806  |
| 6  | 6.432197  | 0.313774  | -0.574908 |
| 1  | 5.960927  | 1.292266  | -0.461282 |
| 6  | 7.790255  | 0.219063  | -0.887480 |
| 1  | 8.378861  | 1.128740  | -1.030246 |

---

**Table S25****B3LYP-D3/def2-SVP**

Rea-Sn(Triplet)

E = -2279.52382610 Hartree

G = -2278.748753 Hartree

| Atomic<br>Number | Coordinates (Angstroms) |           |           |
|------------------|-------------------------|-----------|-----------|
|                  | X                       | Y         | Z         |
| 50               | -1.322359               | -0.772718 | -0.692823 |
| 7                | -2.959169               | -0.789825 | 0.907913  |
| 7                | -3.649858               | -0.837323 | -1.224291 |
| 6                | -4.618433               | -2.762159 | -2.420761 |
| 1                | -3.655593               | -3.287102 | -2.319519 |
| 1                | -5.096989               | -3.090894 | -3.357857 |
| 1                | -5.267392               | -3.063228 | -1.585300 |
| 6                | -0.000020               | 2.056869  | -0.000043 |
| 6                | -5.753341               | -0.513586 | -2.588607 |
| 1                | -6.503979               | -0.858234 | -1.866736 |
| 1                | -6.147879               | -0.705302 | -3.599211 |
| 1                | -5.632275               | 0.573764  | -2.467841 |
| 6                | -3.511710               | -0.857729 | -3.626165 |
| 1                | -3.331495               | 0.228276  | -3.650471 |
| 1                | -3.995427               | -1.151686 | -4.570589 |
| 1                | -2.534640               | -1.361596 | -3.565649 |
| 6                | -3.957580               | -1.146505 | 3.199712  |
| 1                | -5.000978               | -0.879227 | 2.995038  |
| 1                | -3.764284               | -0.930363 | 4.262371  |
| 1                | -3.838880               | -2.229803 | 3.041925  |
| 6                | -1.017608               | 4.271571  | -0.583333 |
| 6                | -1.548998               | -0.623477 | 2.873534  |
| 1                | -1.266806               | -1.679962 | 2.746733  |
| 1                | -1.501907               | -0.378699 | 3.945514  |
| 1                | -0.803437               | 0.009513  | 2.367821  |
| 6                | -1.100819               | 1.422765  | -0.680419 |
| 6                | -3.242360               | 1.155645  | 2.429737  |
| 1                | -2.549365               | 1.719993  | 1.788190  |
| 1                | -3.117088               | 1.498852  | 3.469638  |
| 1                | -4.270307               | 1.390958  | 2.121790  |
| 6                | -6.080359               | -1.981579 | 0.830832  |
| 1                | -5.523551               | -2.921032 | 0.826806  |
| 6                | -0.000034               | 3.479586  | -0.000070 |
| 6                | -3.990076               | -0.809848 | 0.055296  |
| 6                | -5.425839               | -0.789441 | 0.488059  |
| 6                | -4.398308               | -1.235972 | -2.422594 |
| 6                | -2.960680               | -0.357690 | 2.324291  |
| 6                | -2.096668               | 2.218760  | -1.244107 |
| 1                | -2.942050               | 1.733061  | -1.739686 |
| 6                | -8.134550               | -0.757763 | 1.224169  |
| 1                | -9.188809               | -0.745441 | 1.511736  |
| 6                | -2.078073               | 3.641307  | -1.200046 |
| 1                | -2.891639               | 4.209159  | -1.661427 |
| 6                | -7.429121               | -1.965625 | 1.193447  |
| 1                | -7.930535               | -2.899787 | 1.459001  |
| 6                | -0.684660               | 5.737789  | -0.379484 |
| 1                | -1.471325               | 6.247079  | 0.202451  |
| 1                | -0.619289               | 6.271388  | -1.342384 |
| 6                | -6.138906               | 0.417782  | 0.512620  |

|    |           |           |           |
|----|-----------|-----------|-----------|
| 1  | -5.636353 | 1.342983  | 0.223233  |
| 6  | -7.484842 | 0.433961  | 0.885047  |
| 1  | -8.030877 | 1.380506  | 0.903863  |
| 50 | 1.322373  | -0.772665 | 0.692849  |
| 7  | 2.959178  | -0.789788 | -0.907896 |
| 7  | 3.649873  | -0.837188 | 1.224309  |
| 6  | 4.618492  | -2.761953 | 2.420837  |
| 1  | 3.655655  | -3.286916 | 2.319657  |
| 1  | 5.097093  | -3.090643 | 3.357926  |
| 1  | 5.267419  | -3.063044 | 1.585359  |
| 6  | 5.753371  | -0.513360 | 2.588560  |
| 1  | 6.503979  | -0.857998 | 1.866651  |
| 1  | 6.147963  | -0.705063 | 3.599146  |
| 1  | 5.632280  | 0.573987  | 2.467792  |
| 6  | 3.511765  | -0.857488 | 3.626192  |
| 1  | 3.331537  | 0.228515  | 3.650457  |
| 1  | 3.995504  | -1.151400 | 4.570619  |
| 1  | 2.534699  | -1.361369 | 3.565717  |
| 6  | 3.957541  | -1.146557 | -3.199714 |
| 1  | 5.000941  | -0.879226 | -2.995124 |
| 1  | 3.764174  | -0.930499 | -4.262377 |
| 1  | 3.838890  | -2.229848 | -3.041842 |
| 6  | 1.017524  | 4.271614  | 0.583161  |
| 6  | 1.548970  | -0.623542 | -2.873488 |
| 1  | 1.266796  | -1.680027 | -2.746638 |
| 1  | 1.501846  | -0.378808 | -3.945477 |
| 1  | 0.803413  | 0.009456  | -2.367780 |
| 6  | 1.100792  | 1.422813  | 0.680356  |
| 6  | 3.242315  | 1.155621  | -2.429820 |
| 1  | 2.549332  | 1.719988  | -1.788277 |
| 1  | 3.117004  | 1.498779  | -3.469733 |
| 1  | 4.270268  | 1.390967  | -2.121918 |
| 6  | 6.080352  | -1.981644 | -0.830683 |
| 1  | 5.523515  | -2.921080 | -0.826606 |
| 6  | 3.990088  | -0.809795 | -0.055279 |
| 6  | 5.425859  | -0.789461 | -0.488019 |
| 6  | 4.398343  | -1.235771 | 2.422618  |
| 6  | 2.960663  | -0.357713 | -2.324294 |
| 6  | 2.096625  | 2.218849  | 1.244013  |
| 1  | 2.942017  | 1.733185  | 1.739611  |
| 6  | 8.134595  | -0.757922 | -1.224040 |
| 1  | 9.188864  | -0.745654 | -1.511574 |
| 6  | 2.078002  | 3.641394  | 1.199898  |
| 1  | 2.891557  | 4.209280  | 1.661257  |
| 6  | 7.429126  | -1.965759 | -1.193259 |
| 1  | 7.930518  | -2.899955 | -1.458732 |
| 6  | 0.684547  | 5.737817  | 0.379257  |
| 1  | 1.471201  | 6.247100  | -0.202698 |
| 1  | 0.619165  | 6.271452  | 1.342137  |
| 6  | 6.138970  | 0.417735  | -0.512624 |
| 1  | 5.636441  | 1.342970  | -0.223305 |
| 6  | 7.484919  | 0.433845  | -0.885010 |
| 1  | 8.030986  | 1.380370  | -0.903867 |

**Table S26****B3LYP-D3/def2-SVP**

Rea-Pb(Singlet)

E = -2236.72748575 Hartree

G = -2235.957274 Hartree

| Atomic<br>Number | Coordinates (Angstroms) |           |           |
|------------------|-------------------------|-----------|-----------|
|                  | X                       | Y         | Z         |
| 82               | -1.615263               | -0.877766 | -0.671875 |
| 7                | -3.349850               | -0.799747 | 0.974931  |
| 7                | -3.922806               | -0.555600 | -1.174255 |
| 6                | -5.166513               | -2.110748 | -2.642013 |
| 1                | -4.319954               | -2.813476 | -2.587717 |
| 1                | -5.649389               | -2.224518 | -3.626553 |
| 1                | -5.899070               | -2.392505 | -1.871723 |
| 6                | 0.000013                | 2.059296  | -0.000137 |
| 6                | -5.874591               | 0.307770  | -2.534619 |
| 1                | -6.707961               | 0.016370  | -1.883687 |
| 1                | -6.250571               | 0.319825  | -3.570101 |
| 1                | -5.568860               | 1.331231  | -2.268841 |
| 6                | -3.680967               | -0.299837 | -3.548111 |
| 1                | -3.301184               | 0.724641  | -3.410412 |
| 1                | -4.157697               | -0.365479 | -4.538233 |
| 1                | -2.820800               | -0.990587 | -3.548758 |
| 6                | -4.274708               | -1.615117 | 3.155832  |
| 1                | -5.331246               | -1.393954 | 2.956541  |
| 1                | -4.120815               | -1.560067 | 4.245647  |
| 1                | -4.068412               | -2.646815 | 2.829522  |
| 6                | -1.127532               | 4.289888  | -0.306844 |
| 6                | -1.889424               | -0.918920 | 2.881889  |
| 1                | -1.581732               | -1.932250 | 2.577277  |
| 1                | -1.794330               | -0.846883 | 3.976169  |
| 1                | -1.196246               | -0.186191 | 2.437832  |
| 6                | -1.246262               | 1.433582  | -0.372668 |
| 6                | -3.673409               | 0.825005  | 2.836520  |
| 1                | -3.052521               | 1.530333  | 2.263490  |
| 1                | -3.483633               | 0.980672  | 3.910968  |
| 1                | -4.730387               | 1.056265  | 2.649587  |
| 6                | -6.591093               | -1.588158 | 0.663653  |
| 1                | -6.164784               | -2.587541 | 0.551767  |
| 6                | 0.000026                | 3.489377  | -0.000249 |
| 6                | -4.329453               | -0.618803 | 0.096679  |
| 6                | -5.772188               | -0.464562 | 0.484961  |
| 6                | -4.678364               | -0.663285 | -2.430129 |
| 6                | -3.335604               | -0.626223 | 2.435608  |
| 6                | -2.341723               | 2.246554  | -0.664100 |
| 1                | -3.287140               | 1.773150  | -0.943406 |
| 6                | -8.481408               | -0.154473 | 1.155341  |
| 1                | -9.535997               | -0.033745 | 1.415545  |
| 6                | -2.311586               | 3.668651  | -0.632378 |
| 1                | -3.213203               | 4.239912  | -0.874806 |
| 6                | -7.940705               | -1.433911 | 0.993367  |
| 1                | -8.570971               | -2.316579 | 1.128271  |
| 6                | -0.754716               | 5.755787  | -0.202579 |
| 1                | -1.378094               | 6.272980  | 0.546182  |
| 1                | -0.922712               | 6.280066  | -1.158347 |
| 6                | -6.320714               | 0.816163  | 0.647625  |

|    |           |           |           |
|----|-----------|-----------|-----------|
| 1  | -5.686679 | 1.692466  | 0.496777  |
| 6  | -7.667040 | 0.970327  | 0.984850  |
| 1  | -8.083912 | 1.972867  | 1.109705  |
| 82 | 1.615255  | -0.877698 | 0.672033  |
| 7  | 3.349838  | -0.799985 | -0.974836 |
| 7  | 3.922800  | -0.555489 | 1.174307  |
| 6  | 5.166625  | -2.110175 | 2.642449  |
| 1  | 4.320124  | -2.812985 | 2.588310  |
| 1  | 5.649493  | -2.223669 | 3.627025  |
| 1  | 5.899218  | -2.392059 | 1.872240  |
| 6  | 5.874511  | 0.308375  | 2.534458  |
| 1  | 6.707895  | 0.016891  | 1.883581  |
| 1  | 6.250505  | 0.320703  | 3.569931  |
| 1  | 5.568692  | 1.331749  | 2.268446  |
| 6  | 3.680935  | -0.299162 | 3.548102  |
| 1  | 3.301088  | 0.725261  | 3.410172  |
| 1  | 4.157666  | -0.364549 | 4.538240  |
| 1  | 2.820813  | -0.989968 | 3.548903  |
| 6  | 4.274835  | -1.615631 | -3.155586 |
| 1  | 5.331342  | -1.394298 | -2.956323 |
| 1  | 4.120947  | -1.560783 | -4.245412 |
| 1  | 4.068674  | -2.647303 | -2.829110 |
| 6  | 1.127598  | 4.289916  | 0.306220  |
| 6  | 1.889454  | -0.919719 | -2.881782 |
| 1  | 1.581932  | -1.933064 | -2.577052 |
| 1  | 1.794345  | -0.847818 | -3.976069 |
| 1  | 1.196161  | -0.187056 | -2.437799 |
| 6  | 1.246280  | 1.433627  | 0.372495  |
| 6  | 3.673201  | 0.824462  | -2.836711 |
| 1  | 3.052223  | 1.529810  | -2.263802 |
| 1  | 3.483399  | 0.979919  | -3.911186 |
| 1  | 4.730150  | 1.055898  | -2.649822 |
| 6  | 6.591125  | -1.588278 | -0.663290 |
| 1  | 6.164849  | -2.587647 | -0.551143 |
| 6  | 4.329440  | -0.618881 | -0.096617 |
| 6  | 5.772169  | -0.464662 | -0.484922 |
| 6  | 4.678362  | -0.662803 | 2.430210  |
| 6  | 3.335589  | -0.626741 | -2.435541 |
| 6  | 2.341757  | 2.246622  | 0.663801  |
| 1  | 3.287165  | 1.773243  | 0.943181  |
| 6  | 8.481389  | -0.154649 | -1.155336 |
| 1  | 9.535978  | -0.033951 | -1.415551 |
| 6  | 2.311644  | 3.668715  | 0.631853  |
| 1  | 3.213267  | 4.240004  | 0.874189  |
| 6  | 7.940733  | -1.434067 | -0.993024 |
| 1  | 8.571039  | -2.316744 | -1.127681 |
| 6  | 0.754809  | 5.755805  | 0.201721  |
| 1  | 1.378198  | 6.272867  | -0.547122 |
| 1  | 0.922813  | 6.280233  | 1.157406  |
| 6  | 6.320644  | 0.816036  | -0.647929 |
| 1  | 5.686571  | 1.692354  | -0.497335 |
| 6  | 7.666974  | 0.970163  | -0.985169 |
| 1  | 8.083805  | 1.972686  | -1.110286 |

---

**Table S27****B3LYP-D3/def2-SVP**

Rea-Pb(Triplet)

E = -2236.64026086 Hartree

G = -2235.877014 Hartree

| Atomic<br>Number | Coordinates (Angstroms) |           |           |
|------------------|-------------------------|-----------|-----------|
|                  | X                       | Y         | Z         |
| 82               | -1.671893               | -0.751409 | -0.795894 |
| 7                | -3.483596               | -1.117131 | 0.745197  |
| 7                | -4.001028               | -0.150082 | -1.203824 |
| 6                | -5.738945               | -0.444569 | -2.975830 |
| 1                | -5.264264               | -1.402489 | -3.241635 |
| 1                | -6.140610               | 0.009160  | -3.896590 |
| 1                | -6.585864               | -0.651036 | -2.308166 |
| 6                | -0.000234               | 1.982310  | -0.002119 |
| 6                | -5.392189               | 1.814950  | -1.891629 |
| 1                | -6.250546               | 1.633941  | -1.232173 |
| 1                | -5.761626               | 2.355525  | -2.778059 |
| 1                | -4.673149               | 2.461361  | -1.365336 |
| 6                | -3.628581               | 0.841204  | -3.359443 |
| 1                | -2.875576               | 1.519584  | -2.926870 |
| 1                | -4.072415               | 1.338329  | -4.235936 |
| 1                | -3.119027               | -0.071145 | -3.710167 |
| 6                | -4.331521               | -3.034591 | 2.100464  |
| 1                | -5.398349               | -2.885577 | 1.886996  |
| 1                | -4.251628               | -3.522697 | 3.085583  |
| 1                | -3.917217               | -3.717606 | 1.341963  |
| 6                | -1.134585               | 4.204230  | 0.268492  |
| 6                | -2.104528               | -1.978972 | 2.518898  |
| 1                | -1.615103               | -2.674489 | 1.817917  |
| 1                | -2.070214               | -2.432776 | 3.521442  |
| 1                | -1.521753               | -1.044668 | 2.545072  |
| 6                | -1.278012               | 1.357410  | 0.143886  |
| 6                | -4.167955               | -0.727498 | 3.127899  |
| 1                | -3.671607               | 0.253529  | 3.064200  |
| 1                | -4.026420               | -1.120902 | 4.147459  |
| 1                | -5.244872               | -0.584394 | 2.975011  |
| 6                | -6.730919               | -1.674397 | 0.059123  |
| 1                | -6.319812               | -2.541383 | -0.462505 |
| 6                | 0.000030                | 3.419060  | -0.002994 |
| 6                | -4.441015               | -0.619746 | -0.040745 |
| 6                | -5.892286               | -0.590074 | 0.356437  |
| 6                | -4.710252               | 0.496900  | -2.315610 |
| 6                | -3.559352               | -1.698804 | 2.093501  |
| 6                | -2.407299               | 2.175012  | 0.537881  |
| 1                | -3.344508               | 1.669584  | 0.779940  |
| 6                | -8.608359               | -0.537063 | 1.084952  |
| 1                | -9.663680               | -0.516394 | 1.368229  |
| 6                | -2.360374               | 3.556690  | 0.577666  |
| 1                | -3.249994               | 4.135602  | 0.844115  |
| 6                | -8.080595               | -1.648822 | 0.420916  |
| 1                | -8.722299               | -2.500783 | 0.182307  |
| 6                | -0.749086               | 5.664440  | 0.223236  |
| 1                | -0.868669               | 6.142233  | 1.213170  |
| 1                | -1.393311               | 6.236874  | -0.466934 |
| 6                | -6.430103               | 0.521490  | 1.022187  |

|    |           |           |           |
|----|-----------|-----------|-----------|
| 1  | -5.783621 | 1.368776  | 1.259663  |
| 6  | -7.778830 | 0.548528  | 1.384626  |
| 1  | -8.183216 | 1.421083  | 1.903777  |
| 82 | 1.672319  | -0.748436 | 0.799628  |
| 7  | 3.482575  | -1.119515 | -0.742313 |
| 7  | 4.002091  | -0.146291 | 1.203097  |
| 6  | 5.741830  | -0.435697 | 2.974132  |
| 1  | 5.267372  | -1.392915 | 3.242848  |
| 1  | 6.144194  | 0.020504  | 3.893363  |
| 1  | 6.588245  | -0.643946 | 2.306380  |
| 6  | 5.394233  | 1.820617  | 1.883538  |
| 1  | 6.251803  | 1.637488  | 1.223658  |
| 1  | 5.764764  | 2.363729  | 2.767953  |
| 1  | 4.674719  | 2.465599  | 1.356147  |
| 6  | 3.632052  | 0.851546  | 3.356112  |
| 1  | 2.878506  | 1.528450  | 2.922162  |
| 1  | 4.076820  | 1.351588  | 4.230478  |
| 1  | 3.122950  | -0.059675 | 3.710397  |
| 6  | 4.326562  | -3.043133 | -2.090922 |
| 1  | 5.393637  | -2.895376 | -1.877790 |
| 1  | 4.245885  | -3.534498 | -3.074355 |
| 1  | 3.910821  | -3.722679 | -1.330099 |
| 6  | 1.134966  | 4.203617  | -0.275463 |
| 6  | 2.101642  | -1.984509 | -2.512999 |
| 1  | 1.610879  | -2.676532 | -1.809504 |
| 1  | 2.066328  | -2.441822 | -3.513913 |
| 1  | 1.520764  | -1.049125 | -2.542379 |
| 6  | 1.277691  | 1.357030  | -0.147092 |
| 6  | 4.167553  | -0.739443 | -3.126594 |
| 1  | 3.673671  | 0.243024  | -3.065925 |
| 1  | 4.024470  | -1.135891 | -4.144755 |
| 1  | 5.244900  | -0.598457 | -2.974805 |
| 6  | 6.730385  | -1.675383 | -0.058199 |
| 1  | 6.319640  | -2.540795 | 0.466316  |
| 6  | 4.440837  | -0.619812 | 0.041108  |
| 6  | 5.891731  | -0.591652 | -0.357585 |
| 6  | 4.712572  | 0.503953  | 2.312177  |
| 6  | 3.557046  | -1.705802 | -2.088686 |
| 6  | 2.406937  | 2.173759  | -0.543533 |
| 1  | 3.343667  | 1.667616  | -0.785981 |
| 6  | 8.607032  | -0.541380 | -1.089180 |
| 1  | 9.662050  | -0.521782 | -1.373657 |
| 6  | 2.360450  | 3.555336  | -0.584689 |
| 1  | 3.250035  | 4.133702  | -0.852439 |
| 6  | 8.079682  | -1.651165 | -0.421526 |
| 1  | 8.721419  | -2.502636 | -0.181260 |
| 6  | 0.749910  | 5.663966  | -0.231740 |
| 1  | 0.869666  | 6.140687  | -1.222179 |
| 1  | 1.394305  | 6.236947  | 0.457826  |
| 6  | 6.429145  | 0.517943  | -1.026944 |
| 1  | 5.782606  | 1.364697  | -1.266145 |
| 6  | 7.777477  | 0.543627  | -1.390909 |
| 1  | 8.181533  | 1.414641  | -1.912897 |

---



**Table S28**  
**B3LYP-D3/def2-SVP**  
 Prod-Sn (with C<sub>2</sub>H<sub>4</sub>)  
 G = -2357.328199 Hartree

| Atomic<br>Number | Coordinates (Angstroms) |           |           |
|------------------|-------------------------|-----------|-----------|
|                  | X                       | Y         | Z         |
| 50               | 1.595745                | -0.844433 | 1.119173  |
| 50               | -1.852803               | -0.120309 | 1.359037  |
| 6                | 0.274383                | 1.670297  | -0.392102 |
| 6                | -1.316482               | 4.576834  | 1.213315  |
| 1                | -1.484630               | 4.031234  | 0.280684  |
| 1                | -2.106882               | 5.263784  | 1.534111  |
| 6                | 1.423440                | 1.277966  | 0.384937  |
| 6                | 2.559643                | 2.085046  | 0.343083  |
| 1                | 3.438424                | 1.785543  | 0.919975  |
| 6                | 0.462590                | 2.779724  | -1.265810 |
| 7                | 2.989027                | -1.202698 | -0.658270 |
| 7                | -3.101307               | -1.534345 | 0.059779  |
| 6                | 4.089187                | -0.958156 | 0.042528  |
| 6                | 6.025350                | 0.246569  | -0.999462 |
| 1                | 5.440251                | 1.166165  | -0.929155 |
| 6                | 7.519761                | -2.111700 | -1.139620 |
| 1                | 8.100986                | -3.035628 | -1.194134 |
| 6                | 6.224800                | -2.135872 | -0.614556 |
| 1                | 5.788869                | -3.076604 | -0.271312 |
| 6                | 5.471233                | -0.956657 | -0.538792 |
| 6                | 4.731593                | -0.627737 | 2.492971  |
| 6                | -4.993788               | 1.323396  | 1.320608  |
| 6                | -2.795106               | -2.704318 | -0.776959 |
| 6                | 2.769265                | -1.275311 | -2.112987 |
| 6                | -4.168900               | 2.572815  | 1.680666  |
| 1                | -3.387931               | 2.337391  | 2.421700  |
| 1                | -4.810533               | 3.357170  | 2.110967  |
| 1                | -3.670727               | 2.975741  | 0.787440  |
| 7                | 3.838652                | -0.666338 | 1.325107  |
| 6                | -1.960609               | 1.517773  | -1.339921 |
| 1                | -2.959493               | 1.074150  | -1.353344 |
| 7                | -4.026804               | 0.342899  | 0.806638  |
| 6                | -1.712676               | 2.575092  | -2.261199 |
| 1                | -2.490998               | 2.874141  | -2.969841 |
| 6                | 1.293507                | -1.676290 | -2.295636 |
| 1                | 1.092452                | -2.651998 | -1.827198 |
| 1                | 1.037767                | -1.749213 | -3.363642 |
| 1                | 0.623430                | -0.926084 | -1.846308 |
| 6                | -1.035729               | 1.061277  | -0.400286 |
| 6                | -0.502823               | 3.231033  | -2.197413 |
| 6                | -5.525060               | -1.210108 | -0.443637 |
| 6                | 0.055515                | 4.414661  | -2.962849 |
| 6                | -0.202868               | 4.402790  | 1.927079  |
| 1                | -0.031447               | 4.943585  | 2.864246  |
| 1                | 0.579585                | 3.710544  | 1.603032  |
| 6                | -5.855610               | -0.846473 | -1.756493 |
| 1                | -5.152256               | -0.250552 | -2.342015 |
| 6                | -6.436767               | -1.959605 | 0.312495  |
| 1                | -6.174755               | -2.257363 | 1.330072  |
| 6                | -4.208861               | -0.798969 | 0.144740  |

|   |           |           |           |
|---|-----------|-----------|-----------|
| 6 | -7.664122 | -2.338517 | -0.236443 |
| 1 | -8.368568 | -2.923716 | 0.360065  |
| 6 | -7.081227 | -1.228781 | -2.306852 |
| 1 | -7.330497 | -0.939731 | -3.330920 |
| 6 | -7.988828 | -1.974947 | -1.547687 |
| 1 | -8.948554 | -2.272655 | -1.977424 |
| 6 | 8.068295  | -0.909611 | -1.598331 |
| 1 | 9.080548  | -0.891176 | -2.009951 |
| 6 | 7.317197  | 0.268805  | -1.529552 |
| 1 | 7.741387  | 1.210649  | -1.886487 |
| 6 | -1.520243 | -3.330135 | -0.184563 |
| 1 | -0.695699 | -2.602631 | -0.169675 |
| 1 | -1.192007 | -4.193445 | -0.783588 |
| 1 | -1.695645 | -3.667393 | 0.848877  |
| 6 | 3.898121  | -0.021060 | 3.637921  |
| 1 | 3.573462  | 1.000545  | 3.384810  |
| 1 | 4.483076  | 0.022230  | 4.569284  |
| 1 | 3.000270  | -0.629987 | 3.836688  |
| 6 | 5.981604  | 0.255335  | 2.293399  |
| 1 | 6.704748  | -0.194830 | 1.601987  |
| 1 | 6.489777  | 0.398087  | 3.260355  |
| 1 | 5.702446  | 1.246247  | 1.903799  |
| 6 | 3.650710  | -2.341826 | -2.793407 |
| 1 | 4.709451  | -2.053360 | -2.811945 |
| 1 | 3.325462  | -2.484499 | -3.836315 |
| 1 | 3.562483  | -3.306755 | -2.269757 |
| 6 | 2.988726  | 0.099179  | -2.777397 |
| 1 | 2.377667  | 0.869336  | -2.286374 |
| 1 | 2.709059  | 0.055828  | -3.842449 |
| 1 | 4.042335  | 0.404212  | -2.719407 |
| 6 | -3.893358 | -3.788529 | -0.780916 |
| 1 | -4.198903 | -4.036916 | 0.247074  |
| 1 | -3.501696 | -4.703158 | -1.253791 |
| 1 | -4.785547 | -3.483292 | -1.341330 |
| 6 | -2.506806 | -2.242818 | -2.220708 |
| 1 | -3.416033 | -1.835927 | -2.686982 |
| 1 | -2.154058 | -3.083530 | -2.840213 |
| 1 | -1.738448 | -1.456244 | -2.222919 |
| 6 | 5.161773  | -2.056556 | 2.881990  |
| 1 | 4.277645  | -2.695132 | 3.035486  |
| 1 | 5.752476  | -2.051482 | 3.812617  |
| 1 | 5.780062  | -2.506194 | 2.091311  |
| 6 | -6.062903 | 1.745210  | 0.290414  |
| 1 | -6.606370 | 2.626216  | 0.667043  |
| 1 | -6.801181 | 0.956132  | 0.100787  |
| 1 | -5.592313 | 2.016636  | -0.666964 |
| 6 | -5.678946 | 0.781794  | 2.591366  |
| 1 | -4.924449 | 0.490040  | 3.338764  |
| 1 | -6.295294 | -0.099159 | 2.359560  |
| 1 | -6.334498 | 1.545797  | 3.040612  |
| 6 | 2.674160  | 3.255834  | -0.458261 |
| 1 | 3.590459  | 3.853219  | -0.425609 |
| 6 | 1.629416  | 3.580147  | -1.295830 |
| 6 | 1.435885  | 4.708583  | -2.289240 |
| 1 | 2.256965  | 4.759890  | -3.022718 |
| 1 | 1.422379  | 5.678950  | -1.764534 |
| 1 | -0.620546 | 5.284025  | -2.920911 |
| 1 | 0.175271  | 4.164592  | -4.031030 |

**Table S29****B3LYP-D3/def2-SVP**Prod-Sn (with Ph<sub>2</sub>CO)

G = -2854.920458 Hartree

| Atomic<br>Number | Coordinates (Angstroms) |           |           |
|------------------|-------------------------|-----------|-----------|
|                  | X                       | Y         | Z         |
| 50               | -1.652608               | 0.111032  | -0.560248 |
| 50               | 1.835467                | 0.355079  | -1.082194 |
| 8                | 0.824190                | 3.173197  | -0.013350 |
| 7                | 3.421983                | -1.321439 | -1.057580 |
| 6                | 1.627125                | -0.086542 | 1.128815  |
| 6                | -0.691652               | -1.233397 | 0.985420  |
| 7                | 4.048638                | 0.804867  | -0.851017 |
| 7                | -2.975564               | -1.538194 | -1.400131 |
| 6                | 0.561191                | -0.917364 | 1.631018  |
| 7                | -3.757299               | -0.294881 | 0.260240  |
| 6                | -0.299137               | 3.583273  | 0.251538  |
| 6                | -0.805299               | 3.516695  | 1.660933  |
| 6                | -1.755065               | 4.413254  | 2.183443  |
| 1                | -2.161264               | 5.208445  | 1.555940  |
| 6                | -1.163023               | 4.132307  | -0.845352 |
| 6                | 0.776829                | -1.511590 | 2.908909  |
| 6                | 4.431863                | -0.479263 | -0.896198 |
| 6                | -0.091241               | -2.459193 | 3.502402  |
| 6                | -1.514192               | -2.188966 | 1.581195  |
| 1                | -2.458090               | -2.449098 | 1.093926  |
| 6                | 2.703866                | 0.185211  | 1.971948  |
| 1                | 3.516334                | 0.813284  | 1.598094  |
| 6                | -1.228028               | -2.831550 | 2.818561  |
| 1                | -1.922147               | -3.575948 | 3.220968  |
| 6                | -2.565205               | 4.032806  | -0.832501 |
| 1                | -3.070605               | 3.573747  | 0.017416  |
| 6                | 1.889139                | -1.231902 | 3.738939  |
| 6                | -4.035857               | -1.222089 | -0.650607 |
| 6                | 5.858057                | -0.909416 | -0.715443 |
| 6                | -2.856615               | -2.426099 | -2.566699 |
| 6                | 2.843422                | -0.347672 | 3.284818  |
| 1                | 3.714929                | -0.081855 | 3.891370  |
| 6                | 6.363866                | -1.085591 | 0.580837  |
| 1                | 5.710503                | -0.904698 | 1.437225  |
| 6                | -2.164416               | 4.305906  | 3.514588  |
| 1                | -2.896759               | 5.011099  | 3.915629  |
| 6                | -2.674001               | 5.031074  | -3.035412 |
| 1                | -3.261854               | 5.381719  | -3.887758 |
| 6                | -5.394277               | -1.839741 | -0.808818 |
| 6                | -1.277294               | 5.127916  | -3.059869 |
| 1                | -0.773580               | 5.554044  | -3.931138 |
| 6                | -3.315260               | 4.475387  | -1.923928 |
| 1                | -4.403608               | 4.376425  | -1.908817 |
| 6                | 3.352717                | -2.782299 | -0.894354 |
| 6                | 6.698043                | -1.127554 | -1.815778 |
| 1                | 6.302301                | -1.009452 | -2.826770 |
| 6                | -3.145644               | -3.897342 | -2.202656 |
| 1                | -2.553859               | -4.192687 | -1.322299 |
| 1                | -2.871587               | -4.557095 | -3.041576 |
| 1                | -4.207909               | -4.064395 | -1.983065 |

|   |           |           |           |
|---|-----------|-----------|-----------|
| 6 | -0.527068 | 4.669774  | -1.977552 |
| 1 | 0.563695  | 4.712265  | -1.990774 |
| 6 | -5.692548 | -3.061836 | -0.188700 |
| 1 | -4.920345 | -3.569163 | 0.393285  |
| 6 | 1.922220  | -3.181038 | -1.302981 |
| 1 | 1.178513  | -2.700816 | -0.647392 |
| 1 | 1.781992  | -4.269917 | -1.221848 |
| 1 | 1.720367  | -2.883254 | -2.343767 |
| 6 | -1.640547 | 3.298252  | 4.331768  |
| 1 | -1.976248 | 3.207145  | 5.368168  |
| 6 | -4.577982 | 0.331996  | 1.303730  |
| 6 | -0.684071 | 2.412157  | 3.822905  |
| 1 | -0.268248 | 1.621131  | 4.451554  |
| 6 | -3.762718 | -1.975159 | -3.729715 |
| 1 | -4.826443 | -2.090715 | -3.480683 |
| 1 | -3.561425 | -2.576225 | -4.631445 |
| 1 | -3.573915 | -0.917228 | -3.971674 |
| 6 | -1.387174 | -2.330495 | -3.017335 |
| 1 | -1.129218 | -1.299099 | -3.308703 |
| 1 | -1.199124 | -2.981356 | -3.884885 |
| 1 | -0.715123 | -2.639489 | -2.203682 |
| 6 | -0.256823 | 2.531613  | 2.501828  |
| 1 | 0.492866  | 1.852323  | 2.097177  |
| 6 | 4.847336  | 2.034248  | -1.000291 |
| 6 | 1.764893  | -2.022120 | 5.027789  |
| 6 | 0.476252  | -2.889359 | 4.841665  |
| 6 | 8.528701  | -1.682071 | -0.328762 |
| 1 | 9.568962  | -1.981644 | -0.178223 |
| 6 | 8.028910  | -1.508618 | -1.623405 |
| 1 | 8.676539  | -1.674743 | -2.488026 |
| 6 | 3.891415  | 3.205073  | -0.710349 |
| 1 | 3.038936  | 3.208458  | -1.406286 |
| 1 | 4.417659  | 4.166904  | -0.812943 |
| 1 | 3.477003  | 3.139464  | 0.306297  |
| 6 | 7.691881  | -1.472990 | 0.772810  |
| 1 | 8.076861  | -1.607546 | 1.786834  |
| 6 | -5.460401 | 1.441068  | 0.694705  |
| 1 | -4.842550 | 2.134870  | 0.103868  |
| 1 | -5.973670 | 2.014727  | 1.483731  |
| 1 | -6.226898 | 1.015393  | 0.031076  |
| 6 | -6.968107 | -3.618918 | -0.300534 |
| 1 | -7.190193 | -4.569293 | 0.191231  |
| 6 | -5.456503 | -0.666526 | 2.084824  |
| 1 | -6.301144 | -1.037986 | 1.491192  |
| 1 | -5.869482 | -0.172589 | 2.978653  |
| 1 | -4.856222 | -1.527899 | 2.415818  |
| 6 | -3.582567 | 0.963505  | 2.295023  |
| 1 | -2.935932 | 0.192317  | 2.739447  |
| 1 | -4.110047 | 1.490692  | 3.103971  |
| 1 | -2.932656 | 1.697414  | 1.794777  |
| 6 | -6.391420 | -1.185959 | -1.546421 |
| 1 | -6.160835 | -0.238708 | -2.038756 |
| 6 | 4.344251  | -3.530076 | -1.808931 |
| 1 | 4.256504  | -3.170984 | -2.846571 |
| 1 | 4.123361  | -4.609539 | -1.797640 |
| 1 | 5.384717  | -3.400688 | -1.484680 |
| 6 | -7.667667 | -1.744574 | -1.661264 |
| 1 | -8.436312 | -1.227568 | -2.241261 |
| 6 | 5.369877  | 2.162933  | -2.445560 |
| 1 | 6.085649  | 1.362271  | -2.681023 |

|   |           |           |           |
|---|-----------|-----------|-----------|
| 1 | 5.883346  | 3.127474  | -2.591853 |
| 1 | 4.534428  | 2.103015  | -3.160711 |
| 6 | -7.959479 | -2.961064 | -1.036500 |
| 1 | -8.958020 | -3.396689 | -1.123478 |
| 6 | 3.572603  | -3.196334 | 0.576096  |
| 1 | 4.601907  | -2.988887 | 0.898788  |
| 1 | 3.394290  | -4.277300 | 0.697482  |
| 1 | 2.884372  | -2.652741 | 1.238548  |
| 6 | 6.027741  | 2.129663  | -0.009497 |
| 1 | 5.688700  | 1.931642  | 1.018966  |
| 1 | 6.451199  | 3.146205  | -0.039641 |
| 1 | 6.836035  | 1.427444  | -0.247564 |
| 1 | -0.247819 | -2.735818 | 5.659066  |
| 1 | 0.713306  | -3.966935 | 4.838162  |
| 1 | 2.657525  | -2.642461 | 5.211838  |
| 1 | 1.674030  | -1.347381 | 5.896203  |

---

**Table S30****B3LYP-D3/def2-SVP**Prod-Pb (with C<sub>2</sub>H<sub>4</sub>)1<sup>st</sup> frequency = 5.8 cm<sup>-1</sup>

G = -2314.453718 Hartree

| Atomic<br>Number | Coordinates (Angstroms) |           |           |
|------------------|-------------------------|-----------|-----------|
|                  | X                       | Y         | Z         |
| 82               | -1.651210               | -0.865103 | -1.082610 |
| 82               | 1.904886                | -0.034256 | -1.322894 |
| 6                | -0.318054               | 1.768062  | 0.471822  |
| 6                | 1.392914                | 4.309000  | -1.421250 |
| 1                | 1.489037                | 3.918779  | -0.403941 |
| 1                | 2.238965                | 4.884452  | -1.811604 |
| 6                | -1.456770               | 1.354096  | -0.306516 |
| 6                | -2.607529               | 2.138887  | -0.274473 |
| 1                | -3.480097               | 1.818277  | -0.849461 |
| 6                | -0.520062               | 2.894878  | 1.321283  |
| 7                | -3.063191               | -1.185791 | 0.827769  |
| 7                | 3.174731                | -1.510210 | 0.099728  |
| 6                | -4.182157               | -0.891411 | 0.178607  |
| 6                | -5.975516               | 0.473101  | 1.283523  |
| 1                | -5.342033               | 1.350642  | 1.136170  |
| 6                | -7.594460               | -1.780306 | 1.621741  |
| 1                | -8.224415               | -2.663740 | 1.753081  |
| 6                | -6.337291               | -1.906282 | 1.023671  |
| 1                | -5.979551               | -2.885987 | 0.699417  |
| 6                | -5.521525               | -0.780636 | 0.847389  |
| 6                | -4.993779               | -0.598297 | -2.222200 |
| 6                | 5.190094                | 1.301093  | -1.093482 |
| 6                | 2.808479                | -2.638926 | 0.967629  |
| 6                | -2.772845               | -1.221711 | 2.271497  |
| 6                | 4.432408                | 2.560930  | -1.552315 |
| 1                | 3.701282                | 2.323156  | -2.342428 |
| 1                | 5.125190                | 3.314331  | -1.958215 |
| 1                | 3.881747                | 3.004677  | -0.710318 |
| 7                | -4.015785               | -0.648299 | -1.126430 |
| 6                | 1.924308                | 1.669683  | 1.418281  |
| 1                | 2.930796                | 1.242408  | 1.432959  |
| 7                | 4.159654                | 0.374896  | -0.602820 |
| 6                | 1.664529                | 2.749693  | 2.310862  |
| 1                | 2.441196                | 3.080718  | 3.007147  |
| 6                | -1.289647               | -1.621413 | 2.387097  |
| 1                | -1.110409               | -2.599652 | 1.914230  |
| 1                | -0.980294               | -1.690152 | 3.441135  |
| 1                | -0.644098               | -0.870122 | 1.904174  |
| 6                | 0.998257                | 1.177912  | 0.499536  |
| 6                | 0.443668                | 3.383618  | 2.236376  |
| 6                | 5.534950                | -1.147110 | 0.802351  |
| 6                | -0.128206               | 4.577511  | 2.976224  |
| 6                | 0.298056                | 4.087605  | -2.151426 |
| 1                | 0.201259                | 4.475152  | -3.171605 |
| 1                | -0.543665               | 3.511439  | -1.756243 |
| 6                | 5.762666                | -0.699801 | 2.111498  |
| 1                | 5.021581                | -0.061053 | 2.596715  |
| 6                | 6.497346                | -1.949494 | 0.174379  |
| 1                | 6.315340                | -2.312842 | -0.839343 |

|   |           |           |           |
|---|-----------|-----------|-----------|
| 6 | 4.273598  | -0.761440 | 0.085968  |
| 6 | 7.673034  | -2.296852 | 0.844446  |
| 1 | 8.417856  | -2.922472 | 0.346014  |
| 6 | 6.934939  | -1.052195 | 2.784201  |
| 1 | 7.103002  | -0.698380 | 3.804518  |
| 6 | 7.894049  | -1.850357 | 2.151633  |
| 1 | 8.812776  | -2.123928 | 2.676530  |
| 6 | -8.042190 | -0.528517 | 2.055533  |
| 1 | -9.024295 | -0.430102 | 2.524906  |
| 6 | -7.228185 | 0.597242  | 1.887965  |
| 1 | -7.573182 | 1.577805  | 2.225624  |
| 6 | 1.549717  | -3.261768 | 0.336482  |
| 1 | 0.737388  | -2.521876 | 0.277587  |
| 1 | 1.181483  | -4.106694 | 0.938272  |
| 1 | 1.763398  | -3.623176 | -0.681719 |
| 6 | -4.221862 | -0.068792 | -3.446823 |
| 1 | -3.823242 | 0.938852  | -3.248642 |
| 1 | -4.873821 | -0.014583 | -4.332154 |
| 1 | -3.377778 | -0.733375 | -3.697447 |
| 6 | -6.185164 | 0.351807  | -1.970158 |
| 1 | -6.884213 | -0.042618 | -1.222568 |
| 1 | -6.747086 | 0.495140  | -2.906911 |
| 1 | -5.833882 | 1.336738  | -1.626945 |
| 6 | -3.619534 | -2.275359 | 3.013922  |
| 1 | -4.678327 | -1.990559 | 3.065027  |
| 1 | -3.254493 | -2.391555 | 4.047061  |
| 1 | -3.546475 | -3.252145 | 2.509961  |
| 6 | -2.950416 | 0.164003  | 2.925850  |
| 1 | -2.382763 | 0.927014  | 2.374872  |
| 1 | -2.587598 | 0.142034  | 3.966237  |
| 1 | -4.006455 | 0.463914  | 2.947235  |
| 6 | 3.880803  | -3.745534 | 1.061739  |
| 1 | 4.227742  | -4.037178 | 0.058321  |
| 1 | 3.449917  | -4.634729 | 1.549162  |
| 1 | 4.752573  | -3.435971 | 1.650932  |
| 6 | 2.458380  | -2.123858 | 2.379184  |
| 1 | 3.354467  | -1.735491 | 2.884111  |
| 1 | 2.041280  | -2.932020 | 3.002197  |
| 1 | 1.720437  | -1.311174 | 2.316195  |
| 6 | -5.518564 | -2.014730 | -2.533431 |
| 1 | -4.679237 | -2.699806 | -2.732255 |
| 1 | -6.178562 | -2.007620 | -3.416480 |
| 1 | -6.093785 | -2.411859 | -1.684504 |
| 6 | 6.216122  | 1.737308  | -0.024871 |
| 1 | 6.806304  | 2.585006  | -0.407831 |
| 1 | 6.918276  | 0.936421  | 0.236887  |
| 1 | 5.704451  | 2.062696  | 0.893596  |
| 6 | 5.927943  | 0.683315  | -2.298577 |
| 1 | 5.207270  | 0.380001  | -3.074587 |
| 1 | 6.499491  | -0.205242 | -1.992277 |
| 1 | 6.633277  | 1.404299  | -2.743811 |
| 6 | -2.743806 | 3.315772  | 0.515940  |
| 1 | -3.672930 | 3.893205  | 0.480318  |
| 6 | -1.702533 | 3.672631  | 1.344578  |
| 6 | -1.535119 | 4.810197  | 2.333176  |
| 1 | -2.339196 | 4.816246  | 3.087400  |
| 1 | -1.584494 | 5.784176  | 1.817607  |
| 1 | 0.521275  | 5.463001  | 2.879764  |
| 1 | -0.208252 | 4.367482  | 4.056376  |

**Table S31****B3LYP-D3/def2-SVP**Prod-Pb (with Ph<sub>2</sub>CO)

G = -2812.043821 Hartree

| Atomic<br>Number | Coordinates (Angstroms) |           |           |
|------------------|-------------------------|-----------|-----------|
|                  | X                       | Y         | Z         |
| 82               | 1.695178                | 0.266284  | 0.445780  |
| 82               | -1.819932               | 0.513200  | 0.967983  |
| 8                | -0.821581               | 3.276424  | -0.214129 |
| 7                | -3.431438               | -1.283165 | 1.127300  |
| 6                | -1.624966               | -0.210506 | -1.283468 |
| 6                | 0.753798                | -1.225702 | -1.132023 |
| 7                | -4.155748               | 0.788191  | 0.673134  |
| 7                | 3.010140                | -1.445755 | 1.466196  |
| 6                | -0.538565               | -1.036330 | -1.744896 |
| 7                | 3.918814                | -0.309577 | -0.230665 |
| 6                | 0.305552                | 3.658374  | -0.507833 |
| 6                | 0.850368                | 3.411856  | -1.880883 |
| 6                | 1.820952                | 4.232012  | -2.485394 |
| 1                | 2.204194                | 5.107150  | -1.957814 |
| 6                | 1.149684                | 4.333670  | 0.533046  |
| 6                | -0.767976               | -1.751345 | -2.958670 |
| 6                | -4.463135               | -0.505128 | 0.835719  |
| 6                | 0.144642                | -2.675092 | -3.523158 |
| 6                | 1.631566                | -2.142512 | -1.707439 |
| 1                | 2.618770                | -2.284714 | -1.259754 |
| 6                | -2.750458               | -0.080102 | -2.093808 |
| 1                | -3.578263               | 0.542970  | -1.745459 |
| 6                | 1.344705                | -2.892668 | -2.883561 |
| 1                | 2.083047                | -3.600455 | -3.273321 |
| 6                | 2.550684                | 4.214486  | 0.570221  |
| 1                | 3.072892                | 3.652251  | -0.204701 |
| 6                | -1.932564               | -1.619406 | -3.753535 |
| 6                | 4.082448                | -1.244082 | 0.704158  |
| 6                | -5.859524               | -1.020993 | 0.635339  |
| 6                | 2.684489                | -2.524913 | 2.406919  |
| 6                | -2.919258               | -0.752808 | -3.337749 |
| 1                | -3.831329               | -0.597520 | -3.922857 |
| 6                | -6.300428               | -1.335101 | -0.658837 |
| 1                | -5.617780               | -1.203681 | -1.501325 |
| 6                | 2.280341                | 3.942666  | -3.771934 |
| 1                | 3.028309                | 4.588167  | -4.238951 |
| 6                | 2.619840                | 5.476243  | 2.635676  |
| 1                | 3.191801                | 5.921487  | 3.453892  |
| 6                | 5.363366                | -2.006424 | 0.877639  |
| 6                | 1.224886                | 5.597044  | 2.608534  |
| 1                | 0.706985                | 6.137790  | 3.404626  |
| 6                | 3.279601                | 4.777228  | 1.620190  |
| 1                | 4.365991                | 4.661635  | 1.647311  |
| 6                | -3.293155               | -2.747320 | 1.089687  |
| 6                | -6.738169               | -1.176373 | 1.715878  |
| 1                | -6.392418               | -0.948800 | 2.726664  |
| 6                | 2.270235                | -3.791267 | 1.628584  |
| 1                | 1.460408                | -3.558074 | 0.921379  |
| 1                | 1.923701                | -4.579971 | 2.316420  |
| 1                | 3.120428                | -4.190297 | 1.056481  |



|   |           |           |           |
|---|-----------|-----------|-----------|
| 6 | 0.494491  | 5.017831  | 1.571758  |
| 1 | -0.595292 | 5.079346  | 1.548315  |
| 6 | 5.572559  | -3.206866 | 0.184451  |
| 1 | 4.800596  | -3.576928 | -0.493737 |
| 6 | -1.853199 | -3.039613 | 1.556539  |
| 1 | -1.119766 | -2.585368 | 0.870283  |
| 1 | -1.656170 | -4.122689 | 1.577161  |
| 1 | -1.685681 | -2.642096 | 2.570076  |
| 6 | 1.790731  | 2.825655  | -4.458626 |
| 1 | 2.170305  | 2.590066  | -5.456288 |
| 6 | 4.877173  | 0.357421  | -1.117151 |
| 6 | 0.813926  | 2.014648  | -3.870013 |
| 1 | 0.424855  | 1.138482  | -4.394042 |
| 6 | 3.813820  | -2.863691 | 3.402754  |
| 1 | 4.651424  | -3.386150 | 2.924066  |
| 1 | 3.421622  | -3.520174 | 4.195866  |
| 1 | 4.202901  | -1.947939 | 3.874110  |
| 6 | 1.472938  | -2.023506 | 3.216876  |
| 1 | 1.732301  | -1.114203 | 3.781839  |
| 1 | 1.128907  | -2.789630 | 3.928655  |
| 1 | 0.627017  | -1.792378 | 2.550447  |
| 6 | 0.331473  | 2.319161  | -2.598457 |
| 1 | -0.442936 | 1.703162  | -2.140675 |
| 6 | -5.013537 | 1.982115  | 0.665755  |
| 6 | -1.814688 | -2.515279 | -4.971947 |
| 6 | -0.448559 | -3.255970 | -4.792733 |
| 6 | -8.477769 | -1.942640 | 0.213489  |
| 1 | -9.497552 | -2.299953 | 0.049184  |
| 6 | -8.043199 | -1.631027 | 1.505738  |
| 1 | -8.721650 | -1.746280 | 2.354943  |
| 6 | -4.105634 | 3.153089  | 0.242439  |
| 1 | -3.259607 | 3.277335  | 0.936326  |
| 1 | -4.669610 | 4.098828  | 0.228036  |
| 1 | -3.684494 | 2.983534  | -0.760221 |
| 6 | -7.601642 | -1.797171 | -0.867773 |
| 1 | -7.935450 | -2.040037 | -1.879832 |
| 6 | 5.657520  | 1.434744  | -0.334860 |
| 1 | 4.958302  | 2.116519  | 0.175429  |
| 1 | 6.297694  | 2.029770  | -1.006918 |
| 1 | 6.300643  | 0.973245  | 0.429085  |
| 6 | 6.764858  | -3.916535 | 0.345836  |
| 1 | 6.918538  | -4.851123 | -0.199527 |
| 6 | 5.867363  | -0.597950 | -1.816204 |
| 1 | 6.617204  | -1.004571 | -1.126387 |
| 1 | 6.404123  | -0.055647 | -2.611039 |
| 1 | 5.328388  | -1.439597 | -2.276917 |
| 6 | 4.030728  | 1.037317  | -2.211515 |
| 1 | 3.451692  | 0.289300  | -2.773352 |
| 1 | 4.666658  | 1.593561  | -2.917130 |
| 1 | 3.314070  | 1.755547  | -1.781585 |
| 6 | 6.364451  | -1.523753 | 1.731970  |
| 1 | 6.197769  | -0.596359 | 2.284504  |
| 6 | -4.266408 | -3.460522 | 2.050888  |
| 1 | -4.203233 | -3.019157 | 3.058255  |
| 1 | -4.008358 | -4.529371 | 2.125273  |
| 1 | -5.306923 | -3.392491 | 1.708103  |
| 6 | 7.558833  | -2.230874 | 1.890159  |
| 1 | 8.333047  | -1.847393 | 2.559669  |
| 6 | -5.555805 | 2.255414  | 2.083786  |
| 1 | -6.227860 | 1.447921  | 2.409454  |

|   |           |           |           |
|---|-----------|-----------|-----------|
| 1 | -6.121816 | 3.201103  | 2.116008  |
| 1 | -4.724692 | 2.324430  | 2.803458  |
| 6 | 7.761514  | -3.429790 | 1.198327  |
| 1 | 8.695010  | -3.984162 | 1.323500  |
| 6 | -3.457392 | -3.301647 | -0.340928 |
| 1 | -4.490127 | -3.187574 | -0.696195 |
| 1 | -3.211398 | -4.375942 | -0.364177 |
| 1 | -2.790216 | -2.774938 | -1.037704 |
| 6 | -6.189060 | 1.912112  | -0.333713 |
| 1 | -5.835138 | 1.605055  | -1.329679 |
| 1 | -6.652794 | 2.907177  | -0.427245 |
| 1 | -6.969845 | 1.210460  | -0.015590 |
| 1 | 0.218648  | -3.107439 | -5.658171 |
| 1 | -0.590264 | -4.345913 | -4.696774 |
| 1 | -2.659609 | -3.220661 | -5.037761 |
| 1 | -1.834462 | -1.922660 | -5.902456 |

---
